# Supplementary material for: Room-Temperature Direct C4-Hydroxyalkylation of Pyridines via Paired Electrolysis
Source: Research Square preprint supplement (doi:10.21203/rs.3.rs-8259255/v1), 2025-12-08
Supplement: Supplementary file 1 [file 015a522e26213b80263eb838.docx]

**Supporting Information**

**Room-Temperature Direct C4-Hydroxyalkylation of Pyridines *via* Paired Electrolysis**

Chengqian Zhang1, Maorui Wang2*, Pierre. H. Dixneuf3, Min Zhang1*

1Key Lab of Functional Molecular Engineering of Guangdong Province, School of Chemistry and Chemical Engineering, South China University of Technology, Guangzhou 510641, China.

2Key Laboratory for Chemistry and Molecular Engineering of Medicinal Resources (Ministry of Education of China), Guangxi Key Laboratory of Chemistry and Molecular Engineering of Medicinal Resources, School of Chemistry and Pharmaceutical Sciences, Guangxi Normal University, Guilin 541004, People's Republic of China.

3University of Rennes, ISCR UMR CNRS 6226, 35000 Rennes, France.

**Corresponding Authors**

*Email: mrwang@gxnu.edu.cn, [minzhang@scut.edu.cn](mailto:minzhang@scut.edu.cn)

**Table of Contents**

| 1. General information | S2 |
| --- | --- |
| 2. Substrates scope  3. Substrate preparation | S3  S4-S5 |
| 4. Optimization of reaction conditions | S6 |
| 5. General Procedure for the hydroxyalkylation of pyridines  6. Mechanistic studies  7. Crystallographic data  8. DFT calculations | S6-S7  S7-S13  S13-S17  S17-S34 |
| 9. Amplified experiment | S34 |
| 10. Product derivatizations | S35-S37 |
| 11. Characterization of products | S37-S57 |
| 12. NMR spectra of products | S57-S138 |

**1. General information**

All the reagents that are commercially available were used directly without further purification unless otherwise noted. All electric cell and stir bar were heated to 110 ℃ in an oven for 3 hours. All electrodes were sequentially washed with 95% ethanol, oven-dried and polished with sandpaper (P400, P1500) prior to use. The electrochemical experiments were carried out with IKA ElectraSyn 2.0 under air condition unless otherwise noted. All materials of IKA ElectraSyn 2.0 including electrodes and vials were purchased from IKA company. All anhydrous solvents were purchased from Energy Chemical and used without further purification. All supporting electrolytes were used as received unless otherwise noted.

1H NMR, 13C NMR and 19F NMR spectra were obtained on Bruker Advance 400 (400 MHz) or Bruker Advance 500 (500 MHz) spectrometer. Chemical shifts were reported in parts per million (ppm, δ) downfield from tetramethylsilane. Proton coupling patterns are described as singlet (s), doublet (d), triplet (t), double-doublet (dd), double-triplet (dt), multiplet (m). The residual solvent signals were used as references for 1H NMR and 13C NMR spectra (δH = 7.26 ppm, δC = 77.00 ppm).

GC-MS data were obtained by Thermo Scientific Trace 1300-ISQ 7000. TLC analyses were performed using commercially prepared 600 mesh silica gel plates (GF254), and visualization was effected at 254 nm. Silica gel column chromatography was performed using silica gel (200–300 mesh). Preparative TLC was using silica gel plates prepared by 600 mesh silica gel (GF254). High-resolution mass spectra (HRMS) were recorded on a JEOL JMS-600 spectrometer with TOF. Cyclic voltammetry (CV) analysis was performed on Ingsens IGS-1030 electrochemical workstation (Ingsens Instruments (Guangzhou) Co., Ltd., China) with a conventional three electrode cell, using a glassy carbon electrode (GCE，item number GC130) (d = 3 mm) as working electrode, a Pt wire (item number Pt015) as counter electrode and saturated calomel electrode (SCE, item number R0232) as a reference electrode. Electrodes (GC130, Pt015, R0232) were purchased from Tianjin Aida Hengsheng Technology Development Co., Ltd.

**2. List of full substrates**

**Scheme S1.** Substrates employed for the functionalization of pyridines.

**3. Substrate preparation**

**General Synthetic procedure of pyridines**

A mixture of arylboronic acid (6.5 mmol, 1.3 equiv.) and Pd(PPh₃)₄ (0.15 mmol, 3 mol%) was placed in a 100 mL Schlenk tube. The vessel was sealed, purged with nitrogen (three cycles), and charged sequentially with toluene (9 mL), H₂O (9 mL), ethanol (9 mL), Na₂CO₃ (37.5 mmol, 7.5 equiv.), and 2-bromopyridine (5.0 mmol, 1 equiv.). The resulting mixture was heated to 95 °C and stirred overnight, with reaction progress monitored by TLC. Upon complete consumption of the starting material, the mixture was cooled to room temperature, transferred to a separatory funnel, and diluted with saturated aqueous NH₄Cl solution (50 mL). The aqueous layer was extracted with ethyl acetate (3 × 30 mL), and the combined organic extracts were dried over anhydrous Na₂SO₄. After filtration, the solvent was removed under reduced pressure. The residue was purified by silica gel column chromatography to afford the desired product.

**Synthetic procedure of A1-d6**

**2-(phenyl-d5)pyridine (A1-d5)**: **A1-d5** was Prepared from 2-bromopyridine and phenyl-d5-boronic acid following the general procedure of pyridines.

**Triphenyl(2-(phenyl-d5)pyridin-4-yl)phosphonium trifluoromethanesulfonate (S1)**: Compound **S1** was prepared according to a literature procedure. An oven-dried round-bottom flask equipped with a stir bar was charged with **A1-d5** (2.89 g, 18.0 mmol) and PPh3 (5.19 g, 19.8 mmol) under a nitrogen atmosphere. Dichloromethane (DCM, 180 mL) was added, and the solution was cooled to –78 °C. Triflic anhydride (Tf2O, 3.1 mL, 18.0 mmol) was added dropwise over 5 min. After stirring for 1 h at –78 °C, triethylamine (Et3N, 2.5 mL, 18.0 mmol) was added dropwise via syringe. The cooling bath was removed, and the reaction mixture was allowed to warm to room temperature over 30 min. The reaction was quenched by adding H2O (180 mL), and the mixture was transferred to a separatory funnel. The mixture was diluted with additional DCM, and the organic layer was washed with H2O (3 × 180 mL). The combined organic phase was dried over Na2SO4, filtered, and concentrated *in vacuo* to approximately 10 mL. An excess of chilled diethyl ether (Et2O, 0 °C) was added, and the solution was stored at –20 °C overnight. The resulting suspension was filtered through a fritted funnel, and the collected solid was washed with chilled Et2O (0 °C) and dried *in vacuo* to afford pure phosphonium salt **S1** (7.75 g, 76%) as a white solid.

**2-(phenyl-d5)pyridine-4-d (A1-d6)**: The preparation of A1-d6 was performed according to the literature procedure. An oven-dried round bottom flask equipped with a stir bar was charged with S1 (4.28 g, 7.5 mmol), K2CO3 (1.56 g, 11.25 mmol), and placed under a nitrogen atmosphere. A mixture of anhydrous DMF (22.5 mL)/D2O (2.5 mL) was added at room temperature and the reaction was stirred for 15 hours. The reaction mixture was diluted with H2O and the aqueous layer was separated and extracted with EtOAc. The combined organic extracts were washed with a saturated aqueous solution of NH4Cl, dried over Na2SO4, filtered, and concentrated in vacuo. The residue was purified by flash column chromatography to afford the desired product A1-d6 (855 mg, 73% yield) as colorless oil.

**Synthetic procedure of A28**

An oven-dried round bottom flask equipped with a stir bar was charged with (L)-Myrtenol (288 uL, 1.8 mmol) and pyridine (25 uL, 0.306 mmol), then placed under a nitrogen atmosphere and cooled to -15 °C. Anhydrous Et2O (2 mL) was added, followed by dropwise addition of PBr3 (57 uL, 0.6 mmol). The reaction mixture was maintained at -15 °C for 2 hours, then warmed to room temperature and stirred for an additional 15 hours. After the reaction completion, the mixture was diluted with Et2O (5 mL) and ice-water (3 mL), then extracted with Et2O. The combined organic extracts were washed successively with saturated aqueous NaHCO3 solution and brine (twice each), dried over anhydrous sodium sulfate, and filtered. The solvent was removed by rotary evaporation. The residue was purified by silica gel column chromatography to afford product **S2** (349 mg, 90% yield). Subsequently, under a nitrogen atmosphere, 2-(4-hydroxyphenyl)pyridine (172 mg, 1 mmol) was dissolved in DMF (5 mL). In a glovebox, sodium hydride (30 mg, 1.25 mmol), DMF (4 mL), and the solution of 2-(4-hydroxyphenyl)pyridine were sequentially charged into a oven-dried round bottom flask. The mixture was stirred at 0 °C for 30 minutes. A solution of **S2** (1.3 mmol in DMF, 4 mL) was then added slowly. The resulting mixture was stirred at room temperature for 12 hours. After the reaction completion, the mixture was poured into ice-water and extracted with EtOAc (25 mL × 3). The combined organic phases were dried over anhydrous Na2SO4, filtered, and concentrated under reduced pressure. The resultant residue was purified by silica gel column chromatography to afford **A28** (254 mg, 83% yield).

**Synthetic procedure of B34**

The compound was prepared by following the literature procedure. An oven-dried round bottom flask equipped with a stir bar was charged with (L)-Menthol (0.47 g, 3.0 mmol), 4-hydroxyacetophone (0.41 g, 3.0 mmol), PPh3 (0.94 g, 3.6 mmol) and dry THF (20 mL), then placed under a nitrogen atmosphere and cooled to 0 °C. Diisopropyl azodiformate (DIAD, 0.73 g, 3.6 mmol) was added dropwise with for a period of 5 min. The mixture was then placed at room temperature and reacted for 24 h. After the reaction completion, the solvent was removed under reduced pressure, and the resultant residue was purified by silica gel column chromatography to afford product **B34**.

**4. Optimization of Reaction Conditions**

**Table S1.** **Optimization of Reaction Conditions**

| Entry | Variation | **C1**, yield*b* (%) |
| --- | --- | --- |
| **1** | **none** | **81 (C1/C1' > 20:1)** |
| 2 | w/o electricity | N.R. |
| 3 | w/o AcOH | N.R. |
| 4 | w/o TEMPO | 37 |
| 5 | 15 mA, 15 h | Trace |
| 6 | 30 mA, 7.5 h | 68 |
| 7 | AcOH (3 equiv.) | 55 |
| 8 | TEMPO (0.25 equiv.) | 64 |
| 9 | HCOOH instead of AcOH | 45 |
| 10 | Fc instead of TEMPO | Trace |
| 11 | *n*-Bu4NI instead of *n*-Bu4NBF4 | N.R. |
| 12 | NMP or Acetone instead of DMF | 10, 21 |
| 13 | argon instead of air | 81 |
| 14 | GF (-) or Ni (-) instead of Zn (-) | 53*c*, 71 |
| 15 | Zn (+) or Pt (+) instead of GF (+) | 15, 19 |
| 16 | 11 h | 73 |
| 17 | 8 h | 76 |
| 18 | H2O (10 equiv.) | 74 |
| 19 | With B1 (1.5 equiv.) | 41 |
| 20 | With A1 (0.6 mmol), B1 (0.2 mmol) | 57 |
| 21 | B(C6F5)3 (30 mol%) or Sc(OTf)3 (30 mol%) instead of AcOH | trace |

*a*Conditions: undivided cell, graphite plate (GF) as anode, zinc plate (Zn) as cathode, unless otherwise stated, all the reactions were performed in DMF (10 mL) with **A1** (0.2 mmol), **B1** (0.6 mmol), TEMPO (0.5 equiv.), AcOH (5 equiv.), *n*-Bu4NBF4 (0.1 M, 1 mmol), current (25 mA) at 25 oC for 9 h, air atmosphere, room temperature. *b*Isolated yield of **C1'** is given, the ratio between **C1** and **C1'** was determined by GC-MS. *c*For 4.5 h. AcOH = Acetic acid; TEMPO = 2,2,6,6-tetramethyl-1-piperinedinyloxy; NMP = *N*-Methyl-2-pyrrolidone; Fc = Ferrocene; Ni = nickel plate; Pt = platinum plate; N.R. = no reaction

**5. General procedure for the hydroxyalkylation of pyridines**

**Standard method:**

An undivided electrolytic cell equipped with a magnetic stir bar was subsequently charged withTEMPO (0.1 mmol, 0.5 equiv.), **A** (0.2 mmol, 1 equiv.), carbonyl substrate **B** (0.6 mmol, 3 equiv.), *n*-Bu4NBF4 (0.1 M), DMF (10 mL) and AcOH (1 mmol, 5 equiv.) under air condition. After fully stirring and dissolution, a graphite plate anode and a zinc plate cathode were installed. Then the cell was electrolyzed at room temperature under a constant current of 25 mA for 9 hours. Upon the completion of electrolysis, the resulting mixture was poured into saturated NH4Cl solution (50 mL) and the electrodes and cell were rinsed with EtOAc, then extracted the mixture with EtOAc (35 mL × 3). The combined organic layers were dried over anhydrous Na2SO4, filtered, and concentrated under reduced pressure. The resultant residue was purified by preparative TLC on silica to afford hydroxyalkylated pyridines **C**.

(Note: Both the dimensions of graphite and zinc electrodes are approximately 5.25 cm × 0.8 cm × 0.2 cm. The effective immersion areas of graphite anode and zinc cathode are approximately 2.56 cm2.)


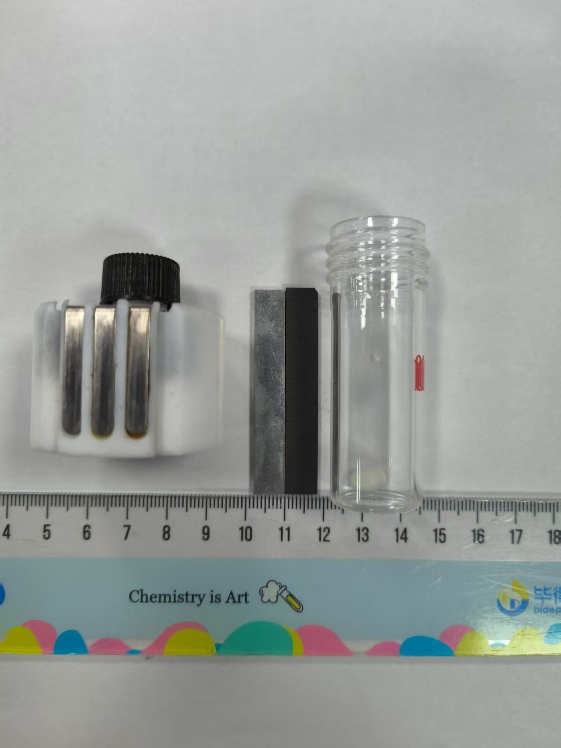

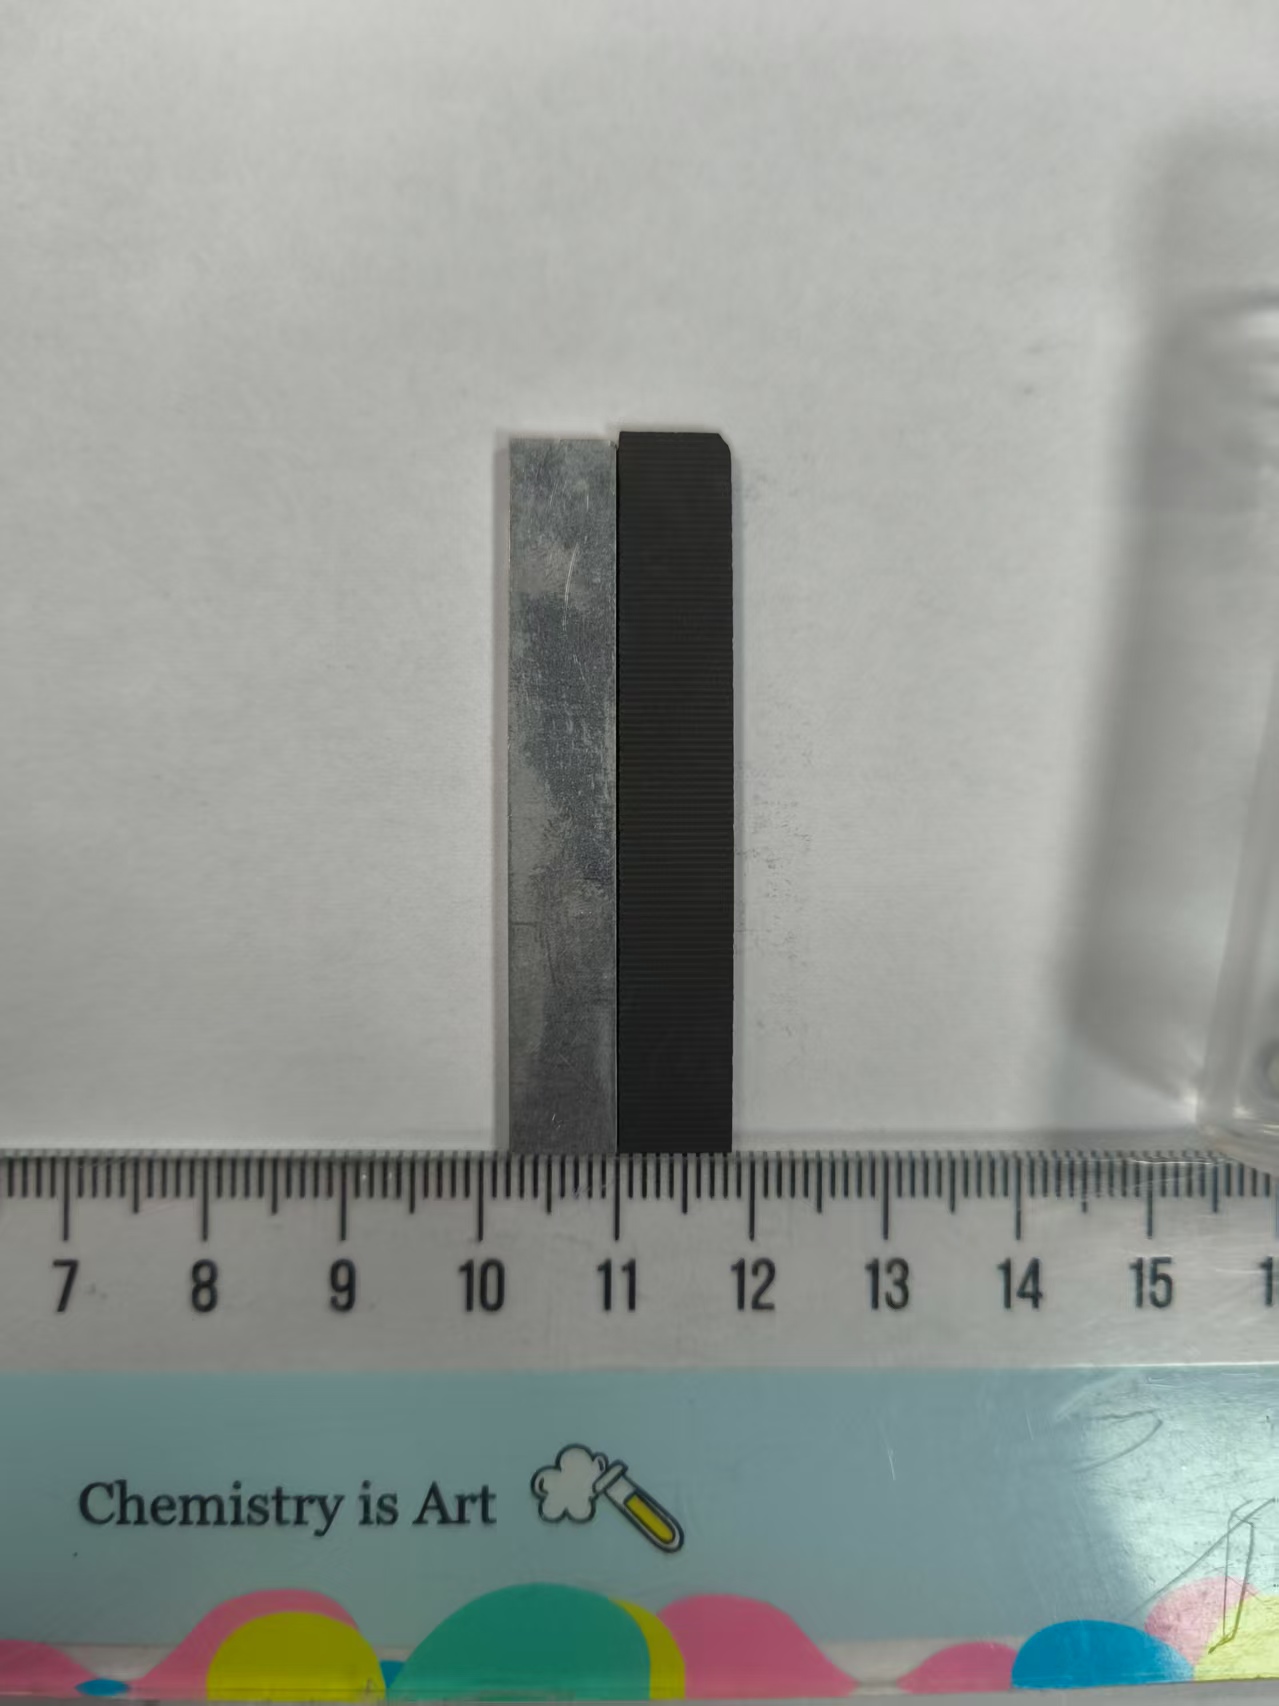


**FigureS1**. The employed electrodes and electrochemical apparatus

**Procedure for the aminoalkylation of pyridines**

An undivided electrolytic cell equipped with a magnetic stir bar,TEMPO (0.1 mmol, 0.5 equiv.), **A1** (0.2 mmol, 1equiv.), aldehyde (0.6 mmol, 3 equiv.), amine (0.6 mmol, 3 equiv.), *n*-Bu4NBF4 (330 mg, 0.1 M) was dissolved in DMF (10 mL) and stirred for 20 minutes. Subsequently, AcOH (1 mmol, 5 equiv.) was added and a graphite plate anode and a zinc plate cathode (or a graphite plate cathode) were installed. Then the cell was electrolyzed at room temperature under a constant current of 25 mA. Upon the completion of electrolysis, the resulting mixture was poured into saturated NH4Cl solution (50 mL) and the electrodes and cell were rinsed with EtOAc, then extracted the mixture with EtOAc (35 mL × 3). The combined organic layers were dried over anhydrous Na2SO4, filtered, and concentrated under reduced pressure. The resultant residue was purified by preparative TLC on silica to afford desired aminoalkylated pyridines **C**.

**6. Mechanistic Studies**

**Control Experiments With 2-phenylpyridine**

**2,2'-diphenyl-4,4'-bipyridine** (**D1**)

White solid; (8.4 mg, 27% yield); 1H NMR (400 MHz, Chloroform-*d*) δ 8.84 (d, *J* = 5.1 Hz, 2H), 8.10 – 8.04 (m, 4H), 7.99 (s, 2H), 7.55 – 7.49 (m, 6H), 7.49 – 7.44 (m, 2H). 13C NMR (126 MHz, Chloroform-*d*) δ 158.6, 150.5, 146.9, 139.0, 129.4, 128.9, 127.1, 120.0, 118.6.**Control Experiments With 4-methoxyacetophenone**

**2,3-bis(4-methoxyphenyl)butane-2,3-diol** (**D2**)

Colorless solid; (30.5 mg, 33% yield, mixture of diastereoisomer); 1H NMR (500 MHz, Chloroform-*d*) δ 7.12 (dd, *J* = 17.6, 8.9 Hz, 4H), 6.80 – 6.73 (m, 4H), 3.80 (d, *J* = 7.3 Hz, 6H), 2.58 (s, 2H), 1.55 (s, 2H), 1.47 (s, 3H). 13C NMR (126 MHz, Chloroform-*d*) δ 158.5, 158.4, 136.0, 135.7, 128.5, 128.1, 112.5, 112.4, 78.7, 78.5, 55.2, 25.1, 25.0.

**Free radical trapping experiments**


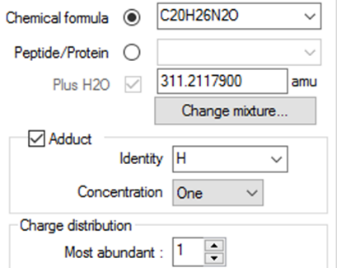

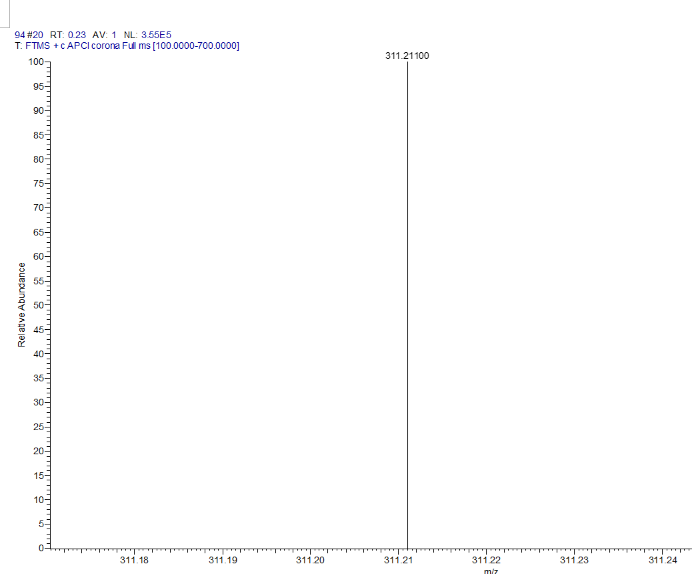


**Figure S2.** HPLC of [TEMPO**-B1+**H]**+** (calculated 311.2118, detected 311.2110)**.**

**Radical clock experiment**

**
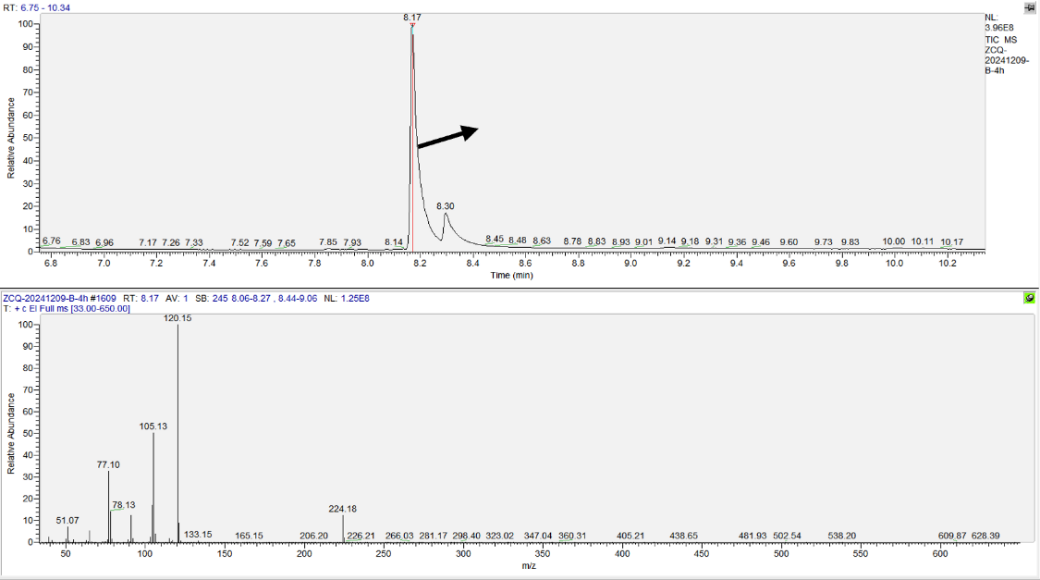
**

**Figure S3.** GC-MS analyses for the radical clock experiment.

**Kinetic isotope effect (KIE) experiment**

An undivided electrolytic cell equipped with a magnetic stir bar was subsequently charged withTEMPO (15.7 mg, 0.1 mmol), **A1** 15.6 mg, 0.1 mmol), **A1-d6** (16.2 mg, 0.1 mmol), carbonyl substrate **B** (91 mg, 0.6 mmol), *n*-Bu4NBF4 (330 mg, 0.1 M), DMF (10 mL) and AcOH (58 uL, 1 mmol) under air condition. After fully stirring and dissolution, a graphite plate anode and a zinc plate cathode were installed. Then the cell was electrolyzed at room temperature under a constant current of 25 mA for 3 hours. Upon the completion of electrolysis, the resulting mixture was poured into saturated NH4Cl solution (50 mL) and the electrodes and cell were rinsed with EtOAc, then extracted the mixture with EtOAc (35 mL × 3). The combined organic layers were dried over anhydrous Na2SO4, filtered, and concentrated under reduced pressure. The resultant residue was purified by preparative TLC on silica to afford desired product **C1** and **C1-d5**, which submitted to 1H NMR analysis to obtain KIE values.


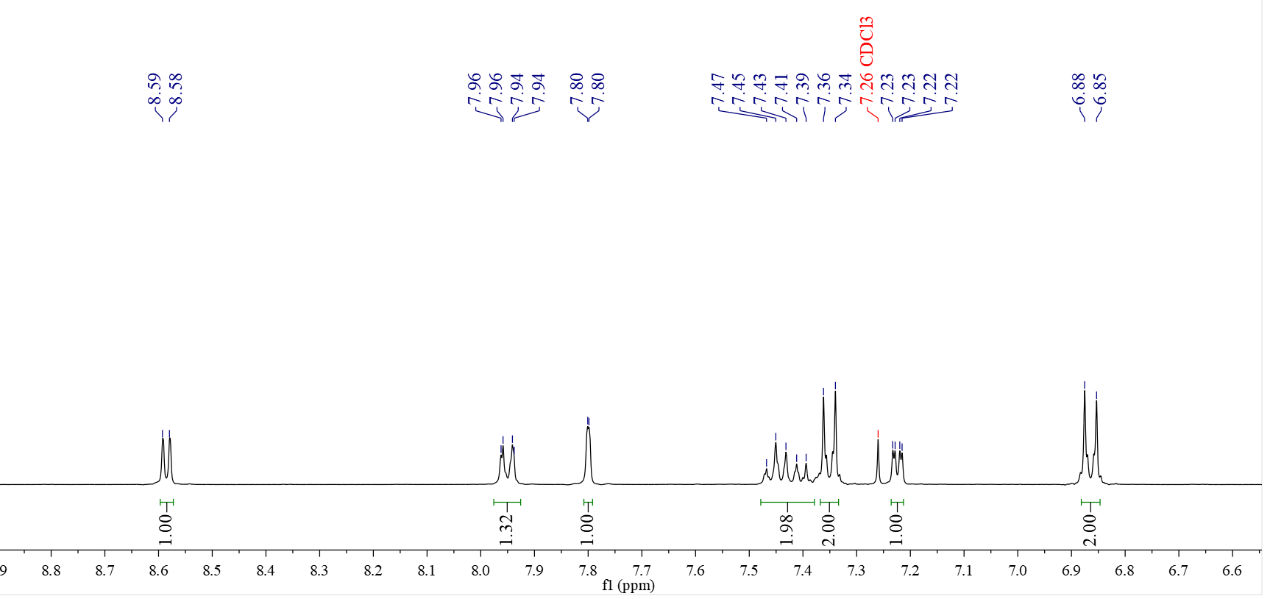


**KIE** = 1.32/(2-1.32) = 1.98/(3-1.98) = 1.94

H2/H3

H1


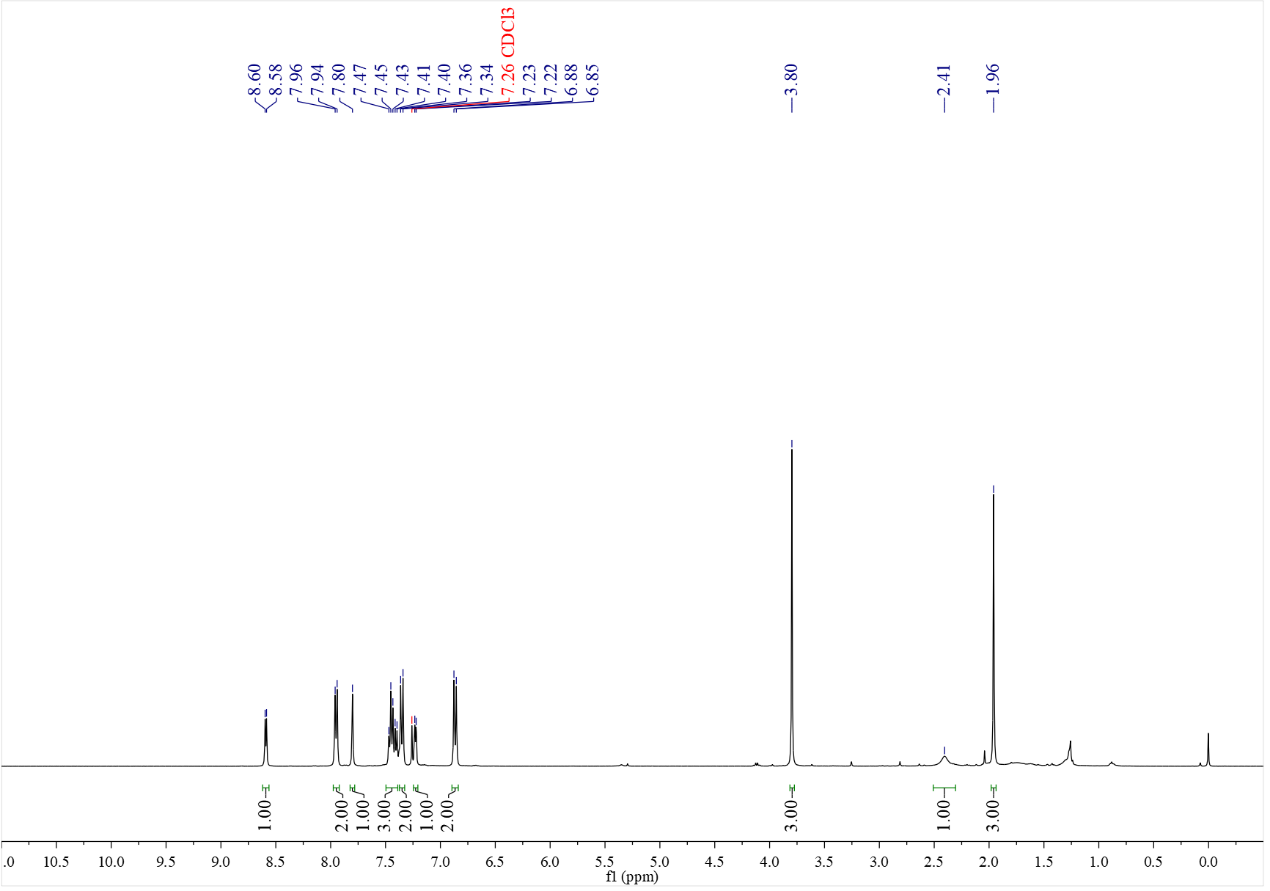


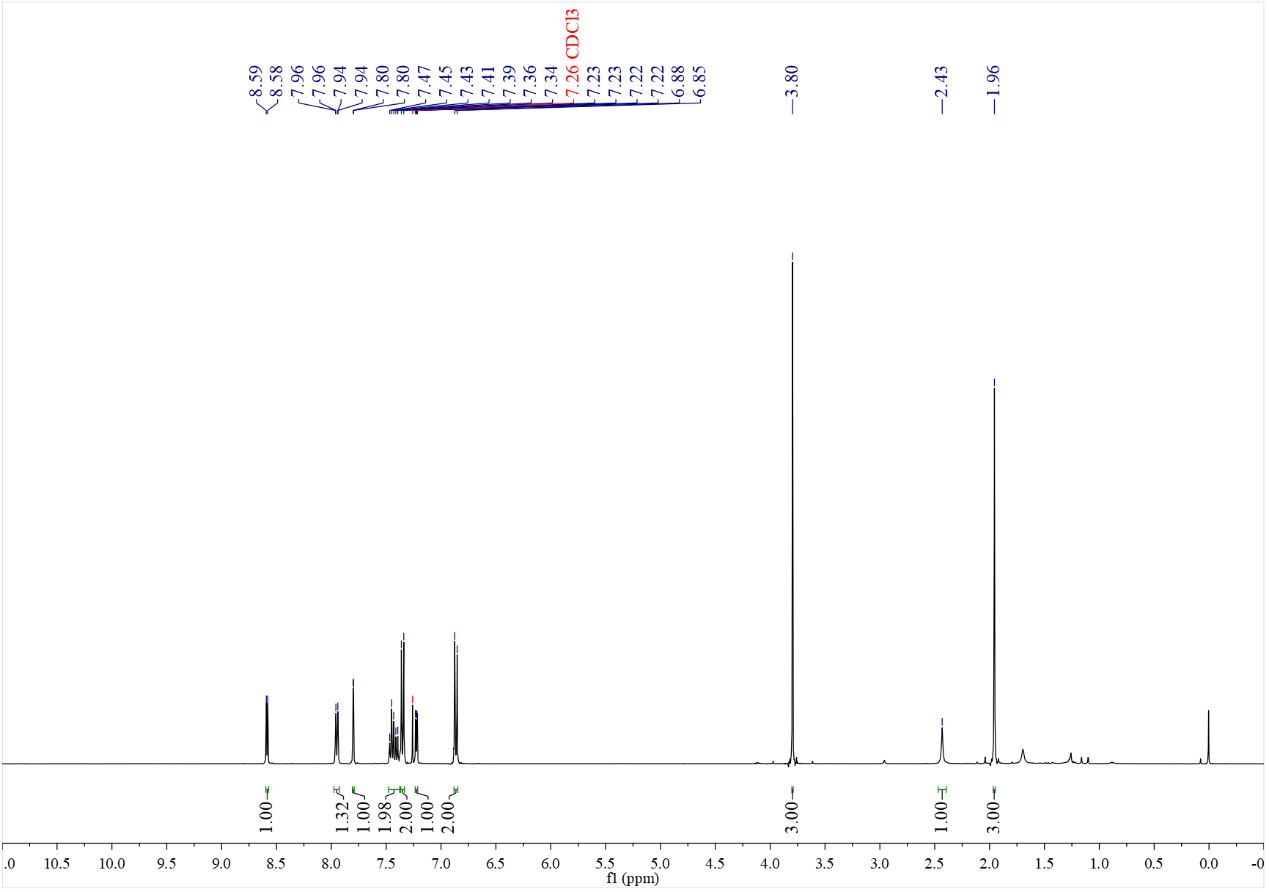


**Figure S4**. Intermolecular competition KIE results and 1H NMR spectra of **C1** and **C1-d5**

**Discussion**: The presence of a significant primary KIE in the C4-hydroxyalkylation of **A1** and **A1-d6**, which suggests that the pyridyl C-H bond cleavage is involved in the rate determining step (Figure S10).

**Cyclic Voltammetry (CV) and Open Circuit Voltage (OCV) Experiments**

**The general procedure for cyclic voltammetry experiments**: Cyclic voltammograms were recorded with Ingsens IGS-1030 electrochemical workstation (Ingsens Instruments (Guangzhou) Co., Ltd., China) at room temperature. All cyclic voltammograms followed IUPAC convention. All cyclic voltammetry (CV) experiments were conducted in a 20 mL glass vial equipped with a magnetic stir bar, fitted with a glassy carbon as working electrode (**WE**, 2 mm in diameter), a saturated calomel electrode (**SCE**) as reference electrode, and a platinum wire as counter electrode (**CE**). All measurements were carried out in 20 mL anhydrous DMF with an electrolyte (*n*-Bu4NBF4, 0.1 M) under N2, using a scan rate of 100 mV/s.

**The general procedure for** **open circuit voltage experiments**: Open circuit voltage was recorded with Ingsens IGS-1030 electrochemical workstation (Ingsens Instruments (Guangzhou) Co., Ltd., China) at room temperature. The open circuit voltage (OCV) experiments were conducted with standard reaction which was equipped a saturated calomel electrode (SCE) as reference electrode.

**
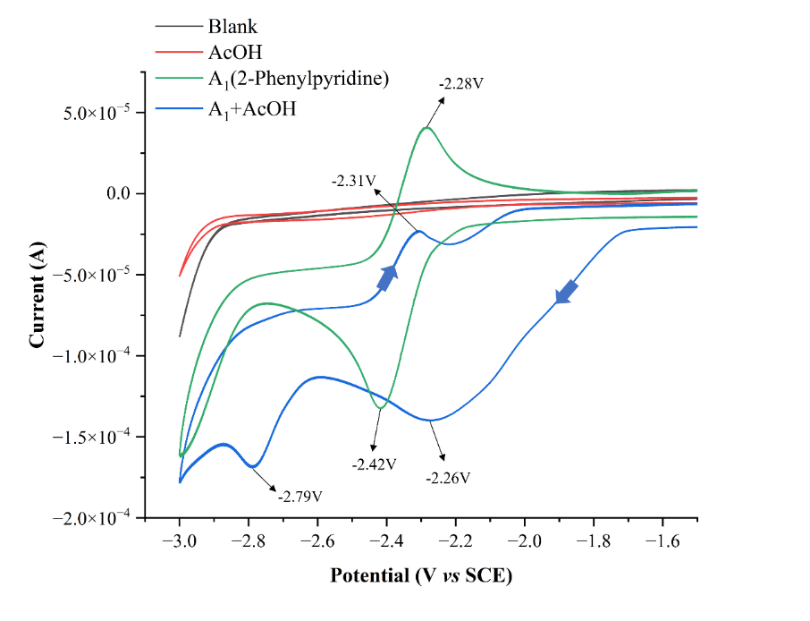
**

**Figure S5**. Cyclic voltammetruy of Blank: (none); AcOH: acetic acid (5 mM); **A1:** 2-phenylpyridine (5 mM); **A1** + AcOH: 2-phenylpyridine (5 mM) + acetic acid (15 mM).

**
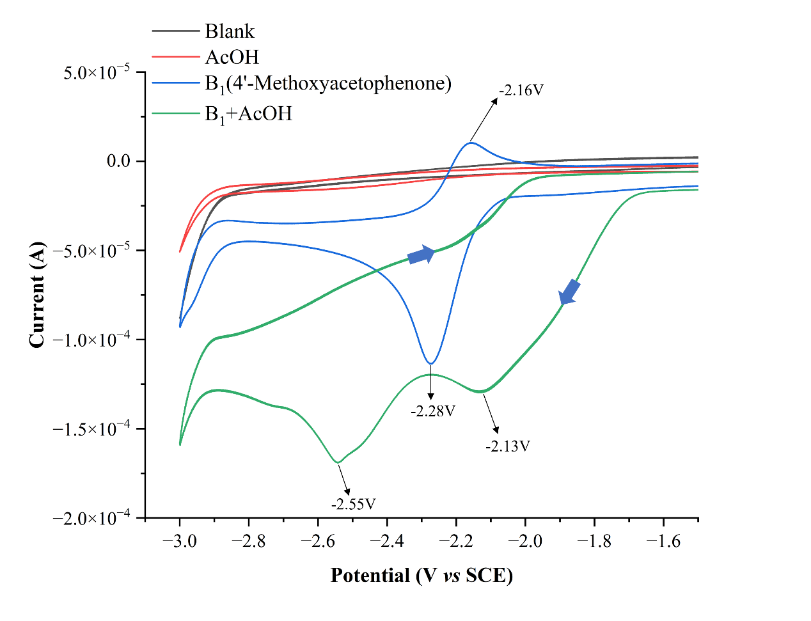
**

**Figure S6**. Cyclic voltammetruy of Blank: (none); AcOH: acetic acid (5 mM); **B1:** 4-methoxyacetophenone (5 mM); **B1** + AcOH: 4-methoxyacetophenone (5 mM) + acetic acid (15 mM).

**
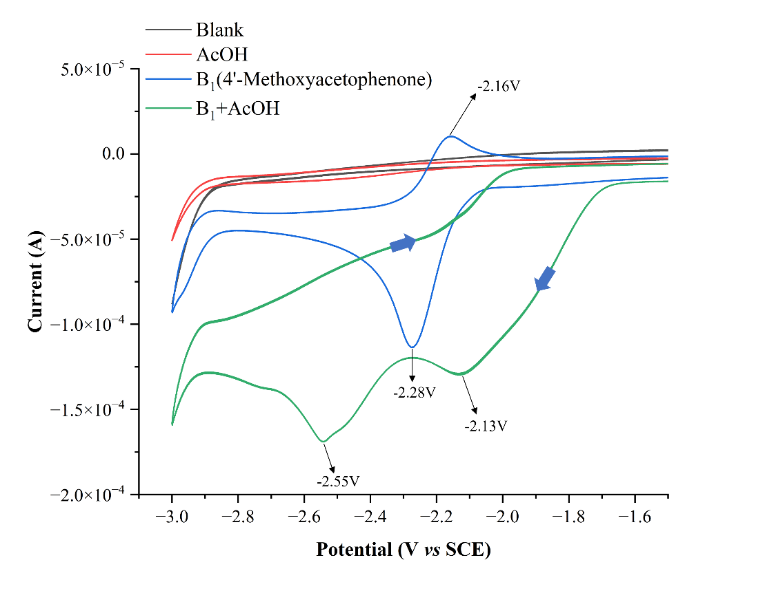
**

**Figure S7**. Cyclic voltammetruy of Blank: (none); **A1** + AcOH: 2-phenylpyridine (5 mM) + acetic acid (15 mM); **B1** + AcOH: 4-methoxyacetophenone (5 mM) + acetic acid (15 mM); **A1** + **B1** + AcOH: 2-phenylpyridine (5 mM) + 4-methoxyacetophenone (5 mM) + acetic acid (15 mM).

**
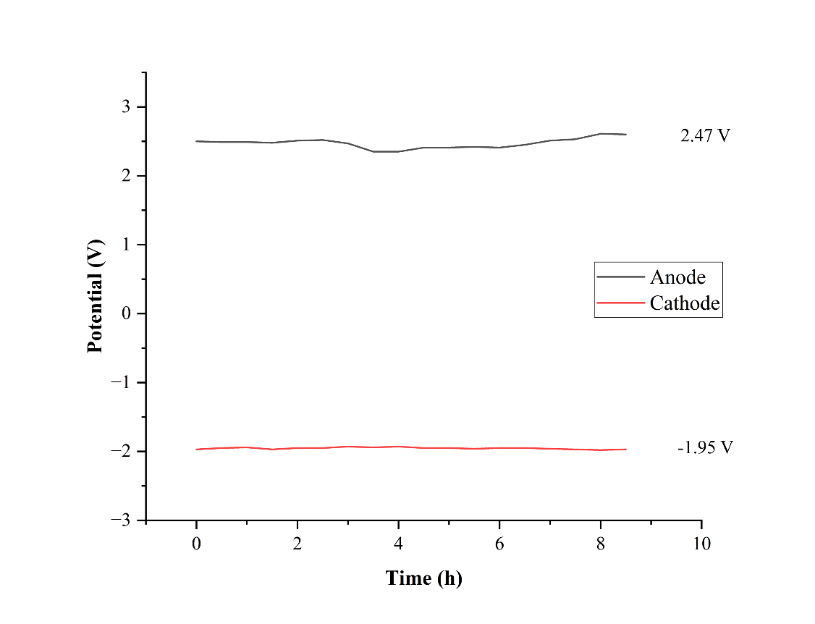
**

**Figure S8**. Open circuit voltage experiment of standard reaction.

**Proposed Mechanism**

**Figure S9.** Proposed mechanism for regioselective hydroxyalkylation of pyridine.

**7. Crystallographic data of compound C21**


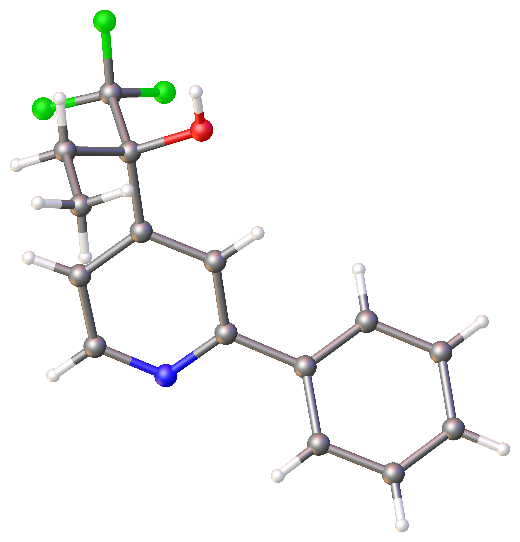


| **Table S2-a Crystal data and structure refinement for exp_14587_auto.** | |
| --- | --- |
| Identification code | exp_14587_auto |
| Empirical formula | C15H14F3NO |
| Formula weight | 281.27 |
| Temperature/K | 293(2) |
| Crystal system | monoclinic |
| Space group | P21/c |
| a/Å | 15.2542(19) |
| b/Å | 6.5561(6) |
| c/Å | 15.3426(18) |
| α/° | 90 |
| β/° | 115.534(15) |
| γ/° | 90 |
| Volume/Å3 | 1384.5(3) |
| Z | 4 |
| ρcalcg/cm3 | 1.349 |
| μ/mm‑1 | 0.112 |
| F(000) | 584.0 |
| Crystal size/mm3 | 0.25 × 0.2 × 0.12 |
| Radiation | Mo Kα (λ = 0.71073) |
| 2Θ range for data collection/° | 5.328 to 52.998 |
| Index ranges | -17 ≤ h ≤ 19, -8 ≤ k ≤ 8, -19 ≤ l ≤ 17 |
| Reflections collected | 9971 |
| Independent reflections | 2817 [Rint = 0.0282, Rsigma = 0.0300] |
| Data/restraints/parameters | 2817/0/183 |
| Goodness-of-fit on F2 | 1.054 |
| Final R indexes [I>=2σ (I)] | R1 = 0.0666, wR2 = 0.1715 |
| Final R indexes [all data] | R1 = 0.0823, wR2 = 0.1823 |
| Largest diff. peak/hole / e Å-3 | 0.49/-0.23 |

| **Table S2-b Fractional Atomic Coordinates (×104) and Equivalent Isotropic Displacement Parameters (Å2×103) for exp_14587_auto. Ueq is defined as 1/3 of the trace of the orthogonalised UIJ tensor.** | | | | |
| --- | --- | --- | --- | --- |
| **Atom** | ***x*** | ***y*** | ***z*** | **U(eq)** |
| F1 | 9319.6(15) | 5486(3) | 8397.1(15) | 85.8(6) |
| F2 | 9517.0(13) | 7256(3) | 9643.5(12) | 83.7(6) |
| F3 | 9994.4(12) | 8409(4) | 8617.8(14) | 85.1(6) |
| O1 | 7582.8(12) | 7144(3) | 8269.8(10) | 42.6(4) |
| N1 | 7580.8(14) | 8055(3) | 5091.5(13) | 44.2(5) |
| C1 | 8030.8(15) | 8302(3) | 7058.6(14) | 34.9(5) |
| C2 | 8470.6(18) | 9580(4) | 6646.7(17) | 46.8(6) |
| C3 | 8223(2) | 9396(4) | 5670.5(17) | 52.4(7) |
| C4 | 7145.2(15) | 6813(3) | 5484.9(14) | 34.7(5) |
| C5 | 7361.9(15) | 6905(3) | 6463.5(14) | 34.1(5) |
| C6 | 8269.4(16) | 8386(4) | 8136.1(15) | 38.5(5) |
| C7 | 8289(2) | 10540(4) | 8509.0(18) | 51.6(7) |
| C8 | 7323(2) | 11611(4) | 8008(2) | 64.6(8) |
| C9 | 9281(2) | 7372(5) | 8701.4(19) | 57.6(7) |
| C10 | 6400.0(16) | 5366(4) | 4836.5(14) | 37.1(5) |
| C11 | 6366(2) | 3388(4) | 5125.5(18) | 51.3(6) |
| C12 | 5657(2) | 2050(5) | 4528(2) | 65.2(8) |
| C13 | 4963(2) | 2715(5) | 3644(2) | 62.4(8) |
| C14 | 4988.9(19) | 4659(5) | 3354.2(19) | 59.8(8) |
| C15 | 5703.7(18) | 5997(4) | 3935.9(16) | 47.2(6) |

| **Table S2-c Anisotropic Displacement Parameters (Å2×103) for exp_14587_auto. The Anisotropic displacement factor exponent takes the form: -2π2[h2a*2U11+2hka*b*U12+…].** | | | | | | |
| --- | --- | --- | --- | --- | --- | --- |
| **Atom** | **U11** | **U22** | **U33** | **U23** | **U13** | **U12** |
| F1 | 80.9(13) | 79.7(13) | 88.7(14) | 5.4(10) | 28.9(11) | 31.6(10) |
| F2 | 70.9(12) | 121.7(16) | 38.9(9) | 18.8(9) | 5.0(8) | 10.8(11) |
| F3 | 42.8(9) | 126.6(17) | 77.5(13) | 13.0(11) | 18.1(9) | -1.0(10) |
| O1 | 54.5(10) | 54.2(10) | 23.0(7) | -6.9(7) | 20.4(7) | -14.5(7) |
| N1 | 52.8(12) | 59.0(12) | 26.5(9) | -2.9(8) | 22.6(9) | -10.5(10) |
| C1 | 37.4(11) | 44.6(12) | 24.9(10) | -2.1(8) | 15.5(9) | -2.3(9) |
| C2 | 50.5(14) | 60.3(15) | 33.4(12) | -9.2(10) | 21.7(11) | -18.6(11) |
| C3 | 65.3(17) | 64.6(16) | 37.0(13) | -2.2(11) | 31.1(12) | -21.9(13) |
| C4 | 38.6(11) | 45.4(12) | 22.9(10) | -0.2(8) | 15.9(8) | 1.4(9) |
| C5 | 38.5(11) | 41.7(11) | 25.3(10) | -1.2(8) | 16.9(9) | -4.5(9) |
| C6 | 41.3(12) | 51.1(13) | 23.7(10) | -4.9(9) | 14.4(9) | -9.6(10) |
| C7 | 67.4(17) | 52.3(15) | 38.3(13) | -10.5(11) | 25.6(12) | -11.7(12) |
| C8 | 94(2) | 48.6(15) | 65.9(18) | 3.7(13) | 48.7(17) | 3.0(15) |
| C9 | 48.1(15) | 78(2) | 40.2(14) | 2.9(13) | 13.0(12) | -0.1(13) |
| C10 | 41.1(12) | 49.0(13) | 24.7(10) | -7.0(9) | 17.5(9) | -2.5(9) |
| C11 | 62.7(16) | 51.9(15) | 37.2(13) | -3.2(11) | 19.6(12) | -4.7(12) |
| C12 | 81(2) | 54.9(17) | 67.5(19) | -14.7(14) | 39.6(17) | -18.8(15) |
| C13 | 51.7(16) | 80(2) | 57.6(17) | -32.6(15) | 25.2(14) | -21.8(14) |
| C14 | 45.4(15) | 90(2) | 37.6(13) | -18.5(13) | 11.3(11) | -1.3(14) |
| C15 | 47.6(14) | 59.5(15) | 30.4(11) | -4.7(10) | 13.1(10) | 1.2(11) |

| **Table S2-d Bond Lengths for exp_14587_auto.** | | | | | | |
| --- | --- | --- | --- | --- | --- | --- |
| **Atom** | **Atom** | **Length/Å** |  | **Atom** | **Atom** | **Length/Å** |
| F1 | C9 | 1.332(4) |  | C4 | C10 | 1.486(3) |
| F2 | C9 | 1.333(3) |  | C6 | C7 | 1.519(3) |
| F3 | C9 | 1.335(3) |  | C6 | C9 | 1.556(4) |
| O1 | C6 | 1.409(3) |  | C7 | C8 | 1.510(4) |
| N1 | C3 | 1.332(3) |  | C10 | C11 | 1.379(4) |
| N1 | C4 | 1.347(3) |  | C10 | C15 | 1.394(3) |
| C1 | C2 | 1.384(3) |  | C11 | C12 | 1.388(4) |
| C1 | C5 | 1.382(3) |  | C12 | C13 | 1.383(5) |
| C1 | C6 | 1.533(3) |  | C13 | C14 | 1.356(5) |
| C2 | C3 | 1.383(3) |  | C14 | C15 | 1.384(4) |
| C4 | C5 | 1.393(3) |  |  |  |  |

| **Table S2-e Bond Angles for exp_14587_auto.** | | | | | | | | |
| --- | --- | --- | --- | --- | --- | --- | --- | --- |
| **Atom** | **Atom** | **Atom** | **Angle/˚** |  | **Atom** | **Atom** | **Atom** | **Angle/˚** |
| C3 | N1 | C4 | 117.64(18) |  | C8 | C7 | C6 | 112.6(2) |
| C2 | C1 | C6 | 122.29(19) |  | F1 | C9 | F2 | 107.1(2) |
| C5 | C1 | C2 | 117.68(19) |  | F1 | C9 | F3 | 106.2(3) |
| C5 | C1 | C6 | 120.03(18) |  | F1 | C9 | C6 | 112.6(2) |
| C3 | C2 | C1 | 118.8(2) |  | F2 | C9 | F3 | 106.5(2) |
| N1 | C3 | C2 | 124.0(2) |  | F2 | C9 | C6 | 111.6(2) |
| N1 | C4 | C5 | 121.6(2) |  | F3 | C9 | C6 | 112.5(2) |
| N1 | C4 | C10 | 117.96(18) |  | C11 | C10 | C4 | 120.6(2) |
| C5 | C4 | C10 | 120.46(19) |  | C11 | C10 | C15 | 118.7(2) |
| C1 | C5 | C4 | 120.35(19) |  | C15 | C10 | C4 | 120.7(2) |
| O1 | C6 | C1 | 106.89(16) |  | C10 | C11 | C12 | 120.6(3) |
| O1 | C6 | C7 | 112.18(19) |  | C13 | C12 | C11 | 119.9(3) |
| O1 | C6 | C9 | 107.0(2) |  | C14 | C13 | C12 | 120.0(3) |
| C1 | C6 | C9 | 107.64(19) |  | C13 | C14 | C15 | 120.7(3) |
| C7 | C6 | C1 | 113.35(19) |  | C14 | C15 | C10 | 120.2(3) |
| C7 | C6 | C9 | 109.4(2) |  |  |  |  |  |

| **Table S2-f Torsion Angles for exp_14587_auto.** | | | | | | | | | | |
| --- | --- | --- | --- | --- | --- | --- | --- | --- | --- | --- |
| **A** | **B** | **C** | **D** | **Angle/˚** |  | **A** | **B** | **C** | **D** | **Angle/˚** |
| O1 | C6 | C7 | C8 | -60.1(3) |  | C4 | C10 | C15 | C14 | -177.4(2) |
| O1 | C6 | C9 | F1 | 59.4(3) |  | C5 | C1 | C2 | C3 | -0.1(4) |
| O1 | C6 | C9 | F2 | -61.2(3) |  | C5 | C1 | C6 | O1 | -10.3(3) |
| O1 | C6 | C9 | F3 | 179.3(2) |  | C5 | C1 | C6 | C7 | -134.4(2) |
| N1 | C4 | C5 | C1 | 0.6(3) |  | C5 | C1 | C6 | C9 | 104.5(2) |
| N1 | C4 | C10 | C11 | 138.3(2) |  | C5 | C4 | C10 | C11 | -43.3(3) |
| N1 | C4 | C10 | C15 | -43.6(3) |  | C5 | C4 | C10 | C15 | 134.8(2) |
| C1 | C2 | C3 | N1 | 0.1(4) |  | C6 | C1 | C2 | C3 | 179.3(2) |
| C1 | C6 | C7 | C8 | 61.0(3) |  | C6 | C1 | C5 | C4 | -179.7(2) |
| C1 | C6 | C9 | F1 | -55.3(3) |  | C7 | C6 | C9 | F1 | -178.8(2) |
| C1 | C6 | C9 | F2 | -175.8(2) |  | C7 | C6 | C9 | F2 | 60.6(3) |
| C1 | C6 | C9 | F3 | 64.7(3) |  | C7 | C6 | C9 | F3 | -58.9(3) |
| C2 | C1 | C5 | C4 | -0.2(3) |  | C9 | C6 | C7 | C8 | -178.8(2) |
| C2 | C1 | C6 | O1 | 170.3(2) |  | C10 | C4 | C5 | C1 | -177.7(2) |
| C2 | C1 | C6 | C7 | 46.2(3) |  | C10 | C11 | C12 | C13 | -1.6(4) |
| C2 | C1 | C6 | C9 | -75.0(3) |  | C11 | C10 | C15 | C14 | 0.8(4) |
| C3 | N1 | C4 | C5 | -0.6(3) |  | C11 | C12 | C13 | C14 | 1.4(4) |
| C3 | N1 | C4 | C10 | 177.7(2) |  | C12 | C13 | C14 | C15 | -0.2(4) |
| C4 | N1 | C3 | C2 | 0.3(4) |  | C13 | C14 | C15 | C10 | -0.9(4) |
| C4 | C10 | C11 | C12 | 178.6(2) |  | C15 | C10 | C11 | C12 | 0.5(4) |

| **Table S2-g Hydrogen Atom Coordinates (Å×104) and Isotropic Displacement Parameters (Å2×103) for exp_14587_auto.** | | | | |
| --- | --- | --- | --- | --- |
| **Atom** | ***x*** | ***y*** | ***z*** | **U(eq)** |
| H1 | 7621 | 7325 | 8814 | 64 |
| H2 | 8924 | 10545 | 7020 | 56 |
| H3 | 8524 | 10262 | 5402 | 63 |
| H5 | 7055 | 6022 | 6718 | 41 |
| H7A | 8469 | 10487 | 9197 | 62 |
| H7B | 8782 | 11322 | 8415 | 62 |
| H8A | 7145 | 11683 | 7328 | 97 |
| H8B | 7374 | 12966 | 8263 | 97 |
| H8C | 6837 | 10867 | 8115 | 97 |
| H11 | 6823 | 2947 | 5726 | 62 |
| H12 | 5649 | 709 | 4722 | 78 |
| H13 | 4478 | 1829 | 3249 | 75 |
| H14 | 4522 | 5097 | 2758 | 72 |
| H15 | 5719 | 7321 | 3725 | 57 |

**8. Density Functional theory (DFT) Calculations**

**Computational details**

All Density Functional theory (DFT) Calculations were performed using the Gaussian 16 software Package1 on our lab’s supercomputer. The geometries of the reactants, transition states, and products were optimized using the M06-2X functional2 and Grimme’s D3 dispersion correction3 with def2-SVPbasis set4 in PCM solvation model5 (EtOAc). Vibrational frequency calculations were performed for all the stationary points to confirm each optimized structure is a local minimum or a transition state structure. Intrinsic Reaction Coordinate (IRC) was used to check whether the transition state connected the reactant and product correctly. Single-point energy calculations were performed at the M06-2X functional and Grimme’s D3 dispersion correction with def2-TZVPP basis set6 using the SMD continuum solvation model7 (DMF). Spin density analysis was carried out using Multiwfn8 and visualized with VMD9. CYLview was used to generate high-quality molecular structure images10.

**(A)**

**(B)**

**(C)**


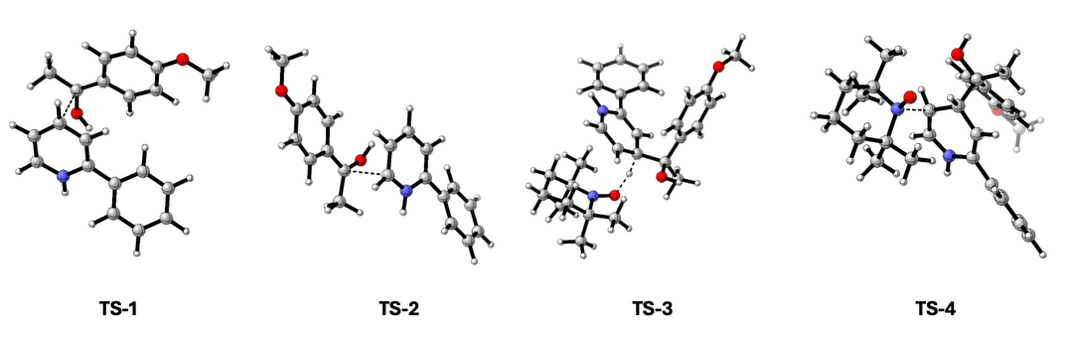


**(D)**

**Figure S10.** (**A**) The chemoselectivity of the reaction between **INT-1** and radical **B1**. (**B**) The reaction pathways between INT-2 and TEMPO+. (**C**) Optimized key transition states. All energies are calculated at M06-2X-D3/def2-TZVPP/SMD(DMF)//M06-2X-D3/def2-SVP/PCM(DMF) level of theory. Gibbs free energies are shown in the brackets. (**D**) The overall pathways of the hydroxyalkyaltion of pyridine.

**Results and discussion**

The N–N bond distance (red bond) in INT6 was scanned from 2.4 Å to 1.4 Å with a step size of 0.0250 Å. The results showed a continuous increase in energy as the N–N bond shortened. Attempts to locate the transition state for the proposed nucleophilic addition were unsuccessful. This suggests that the nitrogen atom is unlikely to attack the TEMPO⁺ species, potentially due to the steric hindrance imposed by the tetramethyl group.


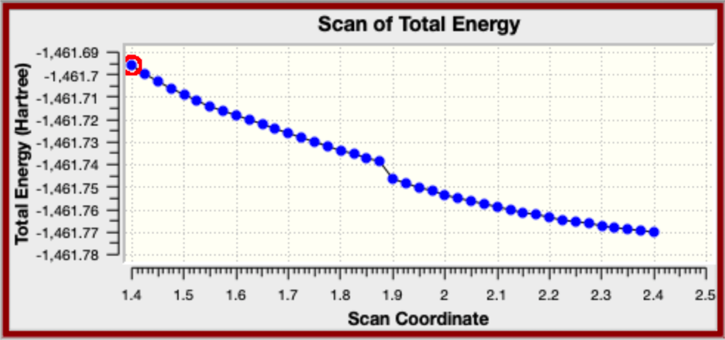


**Figure S11.** Scan coordinate of INT-6.

**Table S3. Thermal data and coordination**

| Name | Gcorr / Hartree | E / Hartree | G / Hartree |
| --- | --- | --- | --- |
| AcO− | 0.0216130 | -228.6161346 | -228.5945216 |
| AcOH | 0.0351780 | -229.1009757 | -229.0657977 |
| radical B1 | 0.1440760 | -499.9743803 | -499.8303043 |
| INT-1 | 0.1453850 | -479.8907421 | -479.7453571 |
| INT-2 | 0.3196190 | -979.9375667 | -979.6179477 |
| INT-4 | 0.3107440 | -979.2113780 | -978.9006340 |
| INT-5 | 0.5814730 | -1463.4562817 | -1462.8748087 |
| Product | 0.2974000 | -978.7549996 | -978.4575996 |
| TEMPO+ | 0.2285080 | -483.5136838 | -483.2851758 |
| TEMPOH | 0.2397260 | -484.3012119 | -484.0614859 |
| TS1 | 0.3131890 | -979.8733559 | -979.5601669 |
| TS2 | 0.3128250 | -979.8693091 | -979.5564841 |
| TS3 | 0.5687760 | -1463.4466028 | -1462.8778268 |
| TS4 | 0.5760280 | -1463.4454543 | -1462.8694263 |

**Coordinations**

AcO−

C 0.20061600 -0.00009600 -0.00581000

O 0.79962200 -1.09524000 0.00132100

O 0.70894700 1.14157400 0.00115000

C -1.34704400 -0.04457300 -0.00211900

H -1.71735200 0.34153500 0.96045400

H -1.74413600 0.61917300 -0.78409600

H -1.72849700 -1.06337100 -0.14854900

AcOH

C -0.09236100 0.12010600 -0.00073200

O -0.63145500 1.19623400 0.00009000

O -0.78204500 -1.02685700 0.00023800

H -1.72809500 -0.80734900 0.00066200

C 1.39000700 -0.11682700 0.00006200

H 1.66642500 -0.70447100 0.88536600

H 1.66734800 -0.70420000 -0.88512800

H 1.91644600 0.84133600 0.00049200

radical B1

C -1.16723600 -0.97294500 -0.00522000

C 0.21642000 -1.10880500 -0.00728300

C 1.08222500 0.01862800 -0.00626200

C 0.45984900 1.30174700 0.00185700

C -0.91437200 1.43324600 0.00377400

C -1.75110300 0.30137200 -0.00027700

H -1.78527700 -1.87036900 -0.00717000

H 0.65350700 -2.10676100 -0.01123300

H 1.06816500 2.20643200 0.01092100

H -1.38112100 2.41946900 0.01068300

O -3.08603000 0.53549700 0.00271600

C -3.95283900 -0.57281000 0.00144100

H -4.97375400 -0.17625200 0.00486400

H -3.80979900 -1.19471600 -0.89702700

H -3.80578800 -1.19989900 0.89565400

C 2.48965500 -0.15452700 -0.01115800

C 3.52179600 0.91881600 -0.00303500

H 4.06447900 0.94539400 0.95828700

H 4.27113800 0.73663700 -0.79170400

H 3.09216400 1.91051700 -0.17494700

O 2.93592800 -1.43659300 0.01753200

H 3.90071400 -1.45000600 -0.00333600

INT-1

C 0.71262700 0.08565100 0.01773400

C 1.48596400 1.23966100 -0.16562600

C 2.87029200 1.20366100 -0.19049400

C 3.53284000 -0.05936400 -0.01707900

C 2.78519500 -1.17773300 0.17151900

N 1.41111000 -1.12016300 0.17959500

H 3.44508200 2.11452400 -0.35092100

H 0.96952200 2.18641900 -0.32425000

H 4.61892300 -0.13818900 -0.03561300

H 3.21742400 -2.16658600 0.32193000

C -0.73861500 0.04473300 0.00373000

C -1.51242400 1.21661300 0.18611300

C -1.43843000 -1.16963700 -0.18730900

C -2.89913800 1.17136800 0.17254700

H -1.01716600 2.17147500 0.36591900

C -2.83089000 -1.20622200 -0.19360700

H -0.89513400 -2.09745500 -0.37383500

C -3.57566900 -0.04075200 -0.01454600

H -3.46419200 2.09323000 0.32219000

H -3.33782000 -2.16008900 -0.35094500

H -4.66571300 -0.07212300 -0.01859200

H 0.90078900 -1.93793500 0.48906200

INT-2

C 2.03523000 0.05321600 1.08615200

C 1.84257300 -0.97907200 0.17028800

C 2.62570000 -0.97097500 -0.99651800

C 3.55239300 0.03310800 -1.23574500

C 3.72816100 1.07167000 -0.30755700

C 2.96383800 1.07636700 0.86147300

H 1.45264300 0.06275400 2.00758200

H 2.51306100 -1.76433000 -1.73911000

H 4.15955900 0.03875400 -2.14191400

H 3.07850400 1.86320000 1.60572100

O 4.64886400 2.01093400 -0.62235300

C 4.85231300 3.07122200 0.28181700

H 5.62482600 3.71339400 -0.15409100

H 3.93134800 3.65868100 0.42510700

H 5.19773000 2.70306500 1.26105500

C 0.79827700 -2.07031300 0.41331100

C 1.46500600 -3.43873600 0.49808800

H 2.21085800 -3.43540500 1.30525500

H 0.71260200 -4.20763900 0.71994400

H 1.96850900 -3.69218500 -0.44502500

O 0.14527300 -1.87215200 1.64882200

H -0.45049100 -1.11580900 1.53918100

C -0.26714400 -2.02194300 -0.74102400

C -0.94554300 -0.67209800 -0.75230800

C -1.31738300 -3.09901000 -0.60157900

C -2.17405000 -0.47075400 -0.22031500

H -0.41462000 0.18345000 -1.17159900

C -2.53219200 -2.83445000 -0.09445600

H -1.08112000 -4.12463300 -0.88646200

H -3.27991900 -3.61058000 0.07353300

H 0.29170600 -2.16534800 -1.68051400

N -2.93922900 -1.54556800 0.19864000

H -3.82072700 -1.38476500 0.66552100

C -2.79830800 0.87285100 -0.11753400

C -2.01236400 1.99596800 0.17824800

C -4.17513300 1.04466400 -0.31982200

C -2.58765200 3.26220200 0.25542500

H -0.94482100 1.86610100 0.36692300

C -4.75030800 2.31206100 -0.23739300

H -4.80085900 0.18501900 -0.56802300

C -3.95877600 3.42448900 0.04863200

H -1.96364300 4.12586500 0.48995700

H -5.82184200 2.43061000 -0.40483200

H -4.40965000 4.41570700 0.11445700

INT-4

C -2.47130100 -0.76364000 -1.00621000

C -2.01914400 -0.88470600 0.31863000

C -2.36332400 0.11043100 1.23018300

C -3.13618000 1.21152400 0.84581000

C -3.57678900 1.32132300 -0.47612200

C -3.23831700 0.31859200 -1.40161500

H -2.21781700 -1.54170000 -1.72895600

H -2.03721200 0.05032100 2.26913900

H -3.38682500 1.96767500 1.58784500

H -3.59426100 0.41805300 -2.42760600

O -4.32292600 2.34016400 -0.94506000

C -4.68689700 3.37080600 -0.05389700

H -5.27912500 4.08881100 -0.63019300

H -5.29518400 2.98272200 0.77803900

H -3.79846000 3.87743600 0.35457100

C -1.15061500 -2.09124600 0.67642600

C -0.97778800 -2.29380800 2.18598600

H -0.39726100 -3.21029700 2.35344000

H -0.45353900 -1.45571700 2.66266100

H -1.96509200 -2.40390500 2.65725100

O -1.67864000 -3.26209900 0.09203400

H -2.57615000 -3.38616300 0.42764100

C 0.23095800 -1.90385100 0.05911900

C 0.94276900 -0.72315500 0.28355700

C 0.81841300 -2.91878400 -0.70760400

C 2.21462500 -0.55150200 -0.24920000

H 0.51328300 0.07656100 0.88782200

C 2.08047500 -2.71567300 -1.22552500

H 0.28819100 -3.84841500 -0.89837500

H 2.60223100 -3.44644900 -1.84133000

N 2.72647300 -1.56178400 -0.98892200

C 3.03024900 0.66198700 -0.05416700

C 4.42527300 0.57520900 0.05749200

C 2.40229500 1.91288300 0.02752700

C 5.18175800 1.72928200 0.24299200

H 4.92763800 -0.39409100 0.03586300

C 3.16479300 3.06264300 0.21045900

H 1.31923300 1.99054800 -0.07872200

C 4.55351200 2.97277500 0.31797800

H 6.26514700 1.65430200 0.33899600

H 2.67227200 4.03393600 0.26256500

H 5.14837900 3.87538000 0.46274600

H 3.64318100 -1.42757700 -1.41764800

INT-5

C 2.41786300 1.50125500 0.87453100

C 1.09722300 1.90886900 1.13615800

C 0.65774300 3.09437800 0.54656400

C 1.47652100 3.84555200 -0.30291100

C 2.77605200 3.40937200 -0.57367700

C 3.24234300 2.23122300 0.03167700

H 2.82394200 0.60139700 1.33882400

H -0.34739900 3.44809200 0.77393600

H 1.08855600 4.76533800 -0.73805000

H 4.26484600 1.91152700 -0.17223400

O 3.64272400 4.05191000 -1.38376800

C 3.21609600 5.24189600 -2.00732000

H 4.05412100 5.59491000 -2.61706200

H 2.34465000 5.06260000 -2.65673300

H 2.95802300 6.01271500 -1.26419100

C 0.15862500 1.08651800 2.02086900

C 0.78670400 0.80854900 3.38718700

H 0.89233200 1.76485500 3.91648300

H 0.12748800 0.15390000 3.97613800

H 1.77883100 0.34328800 3.31588200

O -1.04188700 1.78978900 2.19698900

H -1.81040800 1.17447200 2.03584800

C -0.22337100 -0.26603100 1.31309100

C 0.90220800 -1.23231500 1.18970400

C -0.97602900 0.03222200 -0.00103000

C 1.40278400 -1.65724300 0.02189100

H 1.32247500 -1.64127000 2.10996600

C -0.30302300 -0.48368600 -1.21924600

H -0.93955000 1.12228300 -0.15855600

H -0.64247500 -0.19941000 -2.21538800

H -0.95286700 -0.70700500 2.00625500

N 0.78503500 -1.17075700 -1.16475100

C 2.52561500 -2.59681500 -0.17076400

C 2.51923700 -3.51902600 -1.22682400

C 3.60562700 -2.58188600 0.72292600

C 3.57938400 -4.40911100 -1.38689400

H 1.67350400 -3.57318200 -1.91665700

C 4.65853700 -3.47838500 0.56323500

H 3.62917900 -1.85542800 1.53728400

C 4.64953100 -4.39106700 -0.49302300

H 3.56180700 -5.12549000 -2.20878200

H 5.49608400 -3.45586100 1.26121700

H 5.47866400 -5.08819300 -0.61969600

C -3.32699300 0.86170200 -0.72110200

C -2.94681100 -1.71875800 -0.15151200

C -4.82226500 0.57053700 -0.51720600

C -4.45736600 -1.80348900 0.09570900

C -5.25563400 -0.85877500 -0.78811900

H -5.36968600 1.27596200 -1.15862200

H -5.06306000 0.82148900 0.52497900

H -4.74926600 -2.84949500 -0.07728800

H -4.64657400 -1.57377000 1.15268000

H -6.32702100 -0.96051900 -0.56580900

H -5.13824900 -1.11212300 -1.85316800

N -2.53040800 -0.21173100 0.13420700

O -2.83917800 0.03101000 1.42134400

C -2.22640900 -2.60426900 0.86156500

H -2.63965600 -3.61677200 0.76487700

H -1.14731900 -2.68070800 0.66493300

H -2.40016200 -2.25507600 1.88425100

C -2.64204500 -2.25875400 -1.55154300

H -1.58915000 -2.20880500 -1.85080700

H -2.87467400 -3.33186700 -1.51216500

H -3.25997200 -1.83763900 -2.34725300

C -2.92603200 0.90340500 -2.19714400

H -2.95086200 -0.05422200 -2.72162700

H -3.64253200 1.56324000 -2.70446600

H -1.94101700 1.37075900 -2.33596800

C -3.07739700 2.25682600 -0.14322900

H -3.31260100 2.30002800 0.92368400

H -2.05929800 2.63032800 -0.31098800

H -3.75242300 2.93911500 -0.67773700

H 1.25373800 -1.38988700 -2.04807700

Product

C -2.75850300 0.20930300 1.16166400

C -1.95809600 0.85224000 0.22182100

C -1.98912800 0.39334900 -1.10461500

C -2.79022200 -0.67641200 -1.47143600

C -3.58809100 -1.32432500 -0.51347700

C -3.56943200 -0.87571600 0.80956200

H -2.75577400 0.55896000 2.19466000

H -1.36810100 0.87814300 -1.86241200

H -2.81564200 -1.03959000 -2.49950200

H -4.17704500 -1.35573900 1.57517200

O -4.33159900 -2.36153600 -0.95570600

C -5.14322300 -3.04387400 -0.02787700

H -5.65274300 -3.83959200 -0.58116400

H -4.54050600 -3.49129800 0.77837100

H -5.89515300 -2.37268500 0.41658300

C -1.10713000 2.06375800 0.60998300

C -1.80581900 3.34066800 0.15370700

H -2.80442300 3.37324600 0.60855800

H -1.24184600 4.22366500 0.48372600

H -1.91514300 3.36299100 -0.93859000

O -0.99721100 2.18072200 2.01825000

H -0.52065500 1.41189100 2.35867600

C 0.30534500 1.91876600 0.02544000

C 1.00824300 0.73171000 0.24926900

C 0.95923800 2.93044000 -0.67529800

C 2.31918500 0.59052500 -0.21917700

H 0.53016400 -0.08617800 0.79185200

C 2.27321800 2.70826000 -1.09526700

H 0.47891500 3.88204000 -0.89857100

H 2.80654100 3.49309900 -1.64026900

N 2.93813700 1.58091200 -0.87714300

C 3.09250400 -0.66604500 -0.00676700

C 2.45617400 -1.88544700 0.26509600

C 4.49207900 -0.63851800 -0.08741000

C 3.20253100 -3.04601400 0.46267100

H 1.36737100 -1.94319000 0.30122100

C 5.23729000 -1.79754800 0.11489300

H 4.98268200 0.30902000 -0.30951200

C 4.59530900 -3.00578300 0.39225100

H 2.69125800 -3.98805900 0.66598100

H 6.32614800 -1.75817900 0.05623800

H 5.17863200 -3.91444500 0.54843700

TEMPO+

C -1.34488900 -0.07555300 0.02299300

C 1.34488900 -0.07555200 0.02299300

C -1.24453200 1.30251300 -0.64952500

C 1.24453100 1.30251400 -0.64952500

C -0.00000100 2.08744100 -0.26328400

H -2.16274900 1.84163600 -0.37638200

H -1.26626400 1.15961000 -1.74091900

H 2.16274800 1.84163800 -0.37638300

H 1.26626300 1.15961000 -1.74091900

H -0.00000200 3.04721300 -0.79612400

H 0.00000000 2.33135300 0.80920200

N 0.00000000 -0.78099500 -0.13291000

O 0.00000100 -1.93094200 -0.36386600

C 2.39351900 -0.95214700 -0.64628900

H 2.53693800 -1.89850300 -0.11152700

H 2.13035900 -1.16055700 -1.69157600

H 3.33783200 -0.39360200 -0.62932500

C 1.62190600 0.02549100 1.53322600

H 1.47733600 -0.94243500 2.03056900

H 2.67925500 0.30491900 1.62846200

H 1.02286000 0.79275300 2.03223500

C -1.62190500 0.02549100 1.53322600

H -1.47733400 -0.94243500 2.03056900

H -1.02286200 0.79275400 2.03223400

H -2.67925600 0.30491600 1.62846200

C -2.39351900 -0.95214800 -0.64628900

H -2.13035700 -1.16056300 -1.69157500

H -2.53694100 -1.89850300 -0.11152400

H -3.33783100 -0.39360200 -0.62932900

TEMPOH

C 1.27249500 0.06121300 0.19453600

C -1.27247600 0.06107700 0.19458500

C 1.25590000 -0.88141400 -1.02237000

C -1.25579300 -0.88161700 -1.02227700

C 0.00012400 -1.75147000 -1.07052200

H 2.16567700 -1.50268100 -1.01121500

H 1.29649600 -0.26210700 -1.93306600

H -2.16547000 -1.50303100 -1.01104100

H -1.29655600 -0.26235100 -1.93299300

H 0.00014000 -2.35608200 -1.98977900

H 0.00021600 -2.47001300 -0.23472700

N -0.00004400 0.84075600 0.27555800

O -0.00024200 1.69616200 -0.86202600

H -0.00036600 2.58310600 -0.48333000

C -2.42147500 1.06631400 0.06212700

H -2.40985800 1.76568200 0.91246500

H -2.35144700 1.63997500 -0.86827600

H -3.37992600 0.52825800 0.07057200

C -1.51763800 -0.71391200 1.49731000

H -1.26301900 -0.09092200 2.36601000

H -2.58511800 -0.96852700 1.55753100

H -0.96140600 -1.65371300 1.56490000

C 1.51766500 -0.71388600 1.49718800

H 1.26292700 -0.09101500 2.36593700

H 0.96153100 -1.65375600 1.56464400

H 2.58517100 -0.96839100 1.55744200

C 2.42151100 1.06646500 0.06224700

H 2.35177000 1.63996300 -0.86827000

H 2.40963000 1.76597200 0.91246900

H 3.37996900 0.52842400 0.07108000

TS1

C 1.41742600 0.09953800 1.19698500

C 1.77514300 -1.18253500 0.71587300

C 2.95587000 -1.25746400 -0.07667900

C 3.68774100 -0.12982600 -0.38699700

C 3.29445000 1.14130800 0.07918100

C 2.15753300 1.24201700 0.88387800

H 0.55518600 0.21558000 1.85639100

H 3.28579100 -2.21947000 -0.47121900

H 4.58480300 -0.19682900 -1.00455300

H 1.83650400 2.20354600 1.28440600

O 4.07364800 2.18741800 -0.28944100

C 3.69765600 3.47234700 0.14223200

H 4.43103000 4.17314000 -0.27074100

H 2.69326900 3.74108700 -0.22439000

H 3.70617100 3.54653100 1.24177900

C 0.93100100 -2.31335800 0.94781700

C 1.33441300 -3.74172800 0.84718900

H 1.61626300 -4.14552500 1.83658200

H 0.48334300 -4.33970100 0.48607600

H 2.18361600 -3.88845900 0.17007600

O -0.23531200 -2.13578400 1.62158800

H -0.64950300 -1.30810000 1.32401900

C -0.30617700 -2.13831500 -1.42331600

C -0.67052900 -0.80203000 -1.18928200

C -1.29602200 -3.15080600 -1.19638900

C -1.89303800 -0.46215600 -0.63412700

H 0.03038900 -0.00133100 -1.42740600

C -2.49871600 -2.80795700 -0.66440900

H -1.09738200 -4.19734100 -1.42606900

H -3.28175200 -3.53197000 -0.44233700

H 0.63798200 -2.37378400 -1.91198600

N -2.80805300 -1.49179300 -0.39583500

H -3.63609200 -1.29274800 0.15106700

C -2.33248100 0.91500900 -0.37666300

C -1.39696900 1.95894600 -0.22328400

C -3.69965500 1.23694900 -0.28081500

C -1.81384700 3.26321500 0.01093100

H -0.32967500 1.73720600 -0.26249700

C -4.11227800 2.54675800 -0.03763200

H -4.46041100 0.46907300 -0.43039300

C -3.17573500 3.56805200 0.11012100

H -1.06702300 4.05030500 0.12961400

H -5.17886700 2.76818800 0.02694700

H -3.49996200 4.59160500 0.30187700

TS2

C -4.41569000 -0.08279500 -0.47325400

C -3.70700300 -0.84666800 -1.42981000

C -4.47389800 -1.73860900 -2.22896000

C -5.83861800 -1.86530600 -2.05971800

C -6.52043200 -1.10820500 -1.08751600

C -5.79514600 -0.21118600 -0.29918300

H -3.88356600 0.65066800 0.13412400

H -3.98226300 -2.35372900 -2.98411100

H -6.41771600 -2.55657800 -2.67411900

H -6.29189600 0.40542400 0.44929400

O -7.85911300 -1.30712100 -0.99683300

C -8.57138600 -0.56822600 -0.03520500

H -8.20805400 -0.77836300 0.98397300

H -8.49607600 0.51526800 -0.22271900

H -9.62026600 -0.87392800 -0.11307700

C -2.27519200 -0.78301600 -1.50089600

C -1.45285200 -1.17958600 -2.67603900

H -1.21944900 -0.30464900 -3.30943900

H -0.48526700 -1.58413400 -2.33621100

H -1.95003100 -1.92748700 -3.30437700

O -1.61741900 0.04970200 -0.64800600

H -1.93123000 -0.11095500 0.26257900

C -1.92602400 -1.65152600 1.95626700

C -0.50125600 -1.52832000 2.03035300

C -2.47611600 -2.41692500 0.92334700

C 0.29742700 -2.06478800 1.05763200

H -0.03554900 -1.03277500 2.88163900

C -1.67532700 -2.88914800 -0.09965100

H -3.55197400 -2.58298700 0.85858400

H -2.04148400 -3.52871600 -0.90111900

H -2.55475500 -1.24659900 2.74809600

N -0.29931500 -2.74231400 -0.00076900

H 0.27754300 -3.01362500 -0.78789100

C 1.77012700 -2.01443600 1.07669900

C 2.44300100 -0.94311600 1.68966800

C 2.53433100 -3.03171200 0.48045500

C 3.83311700 -0.89981300 1.71651800

H 1.86798000 -0.12567000 2.12718200

C 3.92736900 -2.98206600 0.50439200

H 2.04168500 -3.89057600 0.02040400

C 4.58325900 -1.91826000 1.12251100

H 4.33622400 -0.05699900 2.19289200

H 4.50210900 -3.78621100 0.04244300

H 5.67321500 -1.87902600 1.13879000

TS3

C -4.14623300 -1.39696900 0.02358100

C -3.66800000 1.17562700 -0.24312100

C -4.02523200 1.33240500 1.24001900

C -4.99814800 0.27659300 1.75123600

C -4.44890300 -1.12363700 1.50152900

H -3.09194100 1.27868300 1.82303900

H -4.43443100 2.34425300 1.37549700

H -5.98330900 0.39560200 1.27500500

H -3.51828800 -1.26131200 2.07589300

H -5.15854200 -1.89161300 1.84227300

N -3.31039000 -0.26151300 -0.50268200

O -2.51943900 -0.50194900 -1.42478700

C -3.37902800 -2.69980200 -0.15533600

H -3.95023700 -3.49298300 0.34525200

H -3.28221100 -2.95992300 -1.21762100

H -2.37395000 -2.66607800 0.27300000

C -5.43684500 -1.49699000 -0.81394700

H -5.20284700 -1.43663300 -1.88576000

H -5.88453100 -2.48005600 -0.61473300

H -6.18134400 -0.73572400 -0.56334600

C -2.47018000 2.04511600 -0.59928300

H -2.22665700 1.98384000 -1.66716300

H -2.71785300 3.08564200 -0.35194800

H -1.59402900 1.75255500 -0.01510500

C -4.83830200 1.57472100 -1.16361800

H -4.89691800 2.67125800 -1.17431500

H -4.65335800 1.22819000 -2.18966700

H -5.80505000 1.19294700 -0.82170900

H -1.17596600 -0.62868000 -0.97522200

H -5.16029100 0.42119900 2.82814100

C -0.15351300 -0.68626700 -0.30020700

C 0.62984900 0.52326500 -0.59350400

C -0.67420100 -0.71400900 1.06931400

C 0.82356500 1.51767600 0.31314900

H 1.08306200 0.63871600 -1.57881400

C -0.46424200 0.32567500 1.93033400

H -1.16349800 -1.60773900 1.45024400

H -0.82528400 0.31227300 2.95892400

H 0.46192900 2.12680300 2.25897200

N 0.25788700 1.41202100 1.56750500

C 1.60953900 2.74022200 0.03197900

C 2.78460800 2.66037800 -0.72742000

C 1.18154700 3.98626200 0.51044300

C 3.51642300 3.81158200 -1.00738700

H 3.13536200 1.68751700 -1.07763000

C 1.91779300 5.13560500 0.22848800

H 0.25436200 4.06775100 1.08257700

C 3.08519200 5.05070400 -0.53028900

H 4.43382400 3.73920000 -1.59283400

H 1.57226600 6.10200800 0.59749600

H 3.66117900 5.95080300 -0.74905500

C 0.49260800 -2.00622500 -0.84186700

C 0.33247100 -2.08403400 -2.35805300

H -0.73669600 -2.17383200 -2.59298200

H 0.72383200 -1.19392100 -2.86821900

H 0.86112700 -2.96334800 -2.75294100

O -0.22732300 -3.05594400 -0.23128100

H 0.14250900 -3.89508100 -0.53688200

C 1.95063900 -2.04380200 -0.38717900

C 3.00634400 -1.64625600 -1.20673900

C 2.24428600 -2.42567100 0.93142400

C 4.32405900 -1.61695600 -0.73946100

H 2.82304000 -1.34550600 -2.23944500

C 3.54522000 -2.40475600 1.41017000

H 1.43237300 -2.74910700 1.58471100

C 4.59945900 -1.99419700 0.57860200

H 5.11931300 -1.30221100 -1.41336400

H 3.77785200 -2.70306700 2.43312600

O 5.83279500 -1.99828200 1.12554800

C 6.91983400 -1.58989600 0.32661900

H 7.81473400 -1.66206400 0.95322500

H 7.03851000 -2.24341900 -0.55195800

H 6.79756900 -0.54928400 -0.01311000

TS4

C -2.88033300 -1.06204700 0.83700200

C -1.69493300 -1.78729100 1.04375400

C -1.56474500 -3.02184700 0.40871200

C -2.57209400 -3.53130300 -0.41698500

C -3.74086100 -2.79279300 -0.62095400

C -3.88637400 -1.55095300 0.01712300

H -3.02998500 -0.09561100 1.32194600

H -0.65855000 -3.60628800 0.56564700

H -2.42944700 -4.50164100 -0.89030500

H -4.80615300 -0.98780700 -0.14438000

O -4.76856300 -3.19154700 -1.40040800

C -4.66474100 -4.43383700 -2.05751300

H -5.58928500 -4.56536500 -2.62911100

H -3.80626400 -4.45117000 -2.74754400

H -4.56317900 -5.26075400 -1.33701200

C -0.56639000 -1.21743700 1.89381000

C -1.05430000 -0.78699700 3.27667500

H -1.38566000 -1.68135800 3.82054500

H -0.23184200 -0.31739600 3.83763600

H -1.89306400 -0.08078400 3.23109400

O 0.41295200 -2.22150300 2.03136200

H 1.24353400 -1.80352400 2.30496200

C 0.11562900 -0.02148800 1.14120300

C -0.66535200 1.24019400 1.10888400

C 0.66348800 -0.42989700 -0.18769700

C -0.97291100 1.89047500 -0.03134500

H -0.97442600 1.68776500 2.05442100

C 0.16324700 0.22945200 -1.33447000

H 0.79065800 -1.50029700 -0.33758500

H 0.31484800 -0.16626800 -2.34048400

H 1.03876000 0.16060400 1.77322800

N -0.56257000 1.32339900 -1.24930200

C -1.70908600 3.17000600 -0.11979200

C -1.34363400 4.13566500 -1.06803700

C -2.76926500 3.43485100 0.75755700

C -2.03022500 5.34661000 -1.13720300

H -0.50125200 3.95923200 -1.74117400

C -3.44907600 4.64797200 0.68822300

H -3.07381500 2.67953800 1.48421700

C -3.08301500 5.60508400 -0.25996500

H -1.73401100 6.09319200 -1.87488000

H -4.27674200 4.84226100 1.37133400

H -3.62047200 6.55256800 -0.31558300

C 3.33523500 -1.54542900 -0.46695000

C 3.24019700 1.09913000 -0.30548200

C 4.84695700 -1.41758700 -0.17209700

C 4.73980400 1.07324800 0.04915400

C 5.47964100 -0.09714900 -0.58435600

H 5.34236600 -2.26245800 -0.67210300

H 4.97731900 -1.55705400 0.91220800

H 5.16652200 2.03339000 -0.27627400

H 4.82776400 1.02452800 1.14528500

H 6.52929700 -0.08546100 -0.25885100

H 5.50273300 -0.00221000 -1.68034100

N 2.69811900 -0.28081900 0.17521300

O 2.70479700 -0.34810200 1.42909200

C 2.54382600 2.18384100 0.50662600

H 3.06371600 3.13124200 0.31260200

H 1.49962700 2.31456600 0.19588900

H 2.58339000 1.97963500 1.58198200

C 3.06163600 1.39498300 -1.79535800

H 2.11331100 1.04007300 -2.20809500

H 3.07567300 2.48650500 -1.91529300

H 3.86903800 0.99544700 -2.41520900

C 3.04686100 -1.67686600 -1.95806000

H 3.54835000 -0.93125700 -2.57901300

H 3.41838600 -2.66143900 -2.27244600

H 1.97048700 -1.66290700 -2.17561700

C 2.84707700 -2.80153200 0.25133700

H 2.99609700 -2.72980200 1.33376100

H 1.79920800 -3.05047400 0.04709100

H 3.46054400 -3.63373100 -0.11901400

H -0.91739100 1.74332100 -2.10803900

**References:**

1. Frisch, M. J.; Trucks, G. W.; Schlegel, H. B.; Scuseria, G. E.; Robb, M. A.; Cheeseman, J. R.; Scalmani, G.; Barone, V.; Petersson, G. A.; Nakatsuji, H.; Li, X.; Caricato, M.; Marenich, A. V.; Bloino, J.; Janesko, B. G.; Gomperts, R.; Mennucci, B.; Hratchian, H. P.; Ortiz, J. V.; Izmaylov, A. F.; Sonnenberg, J. L.; Williams-Young, D.; Ding, F.; Lipparini, F.; Egidi, F.; Goings, J.; Peng, B.; Petrone, A.; Henderson, T.; Ranasinghe, D.; Zakrzewski, V. G.; Gao, J.; Rega, N.; Zheng, G.; Liang, W.; Hada, M.; Ehara, M.; Toyota, K.; Fukuda, R.; Hasegawa, J.; Ishida, M.; Nakajima, T.; Honda, Y.; Kitao, O.; Nakai, H.; Vreven, T.; Throssell, K.; Montgomery Jr., J. A.; Peralta, J. E.; Ogliaro, F.; Bearpark, M. J.; Heyd, J. J.; Brothers, E. N.; Kudin, K. N.; Staroverov, V. N.; Keith, T. A.; Kobayashi, R.; Normand, J.; Raghavachari, K.; Rendell, A. P.; Burant, J. C.; Iyengar, S. S.; Tomasi, J.; Cossi, M.; Millam, J. M.; Klene, M.; Adamo, C.; Cammi, R.; Ochterski, J. W.; Martin, R. L.; Morokuma, K.; Farkas, O.; Foresman, J. B.; Fox, D. J. Gaussian 16, Rev. B.01: Wallingford, CT, 2016.

2. Zhao Y.; Truhlar D G.; The M06 suite of density functionals for main group thermochemistry, thermochemical kinetics, noncovalent interactions, excited states, and transition elements: two new functionals and systematic testing of four M06-class functionals and 12 other functionals. *Theor. Chem. Acc.* 2008, 120: 215-241.

3. (a) Grimme, S.; Antony, J.; Ehrlich, S.; Krieg, H. A consistent and accurate ab initio parametrization of density functional dispersion correction (DFT-D) for the 94 elements H-Pu. *J. Chem. Phys.* 2010, 132, 154104; b) Grimme, S.; Ehrlich, S.; Goerigk, L. Effect of the damping function in dispersion corrected density functional theory. *J. Comput. Chem*. 2011, 32, 1456-1465.

4. F. Weigend and R. Ahlrichs. "Balanced basis sets of split valence, triple zeta valence and quadruple zeta valence quality for H to Rn: Design and assessment of accuracy". Phys. Chem. Chem. Phys. 2005, 7: 3297.

5. Cances E, Mennucci B, Tomasi J. A new integral equation formalism for the polarizable continuum model: Theoretical background and applications to isotropic and anisotropic dielectrics[J]. The Journal of chemical physics, 1997, 107(8): 3032-3041.

6. (a) Weigend F.; Ahlrichs R. Balanced basis sets of split valence, triple zeta valence and quadruple zeta valence quality for H to Rn: Design and assessment of accuracy. *Phys. Chem. Chem.* *Phys*. 2005, 7, 3297-3305. b) WeigendF. Accurate Coulomb-fitting basis sets for H to Rn. *Phys. Chem. Chem.* *Phys*. 2006, 8, 1057-1065.

7. Marenich, A. V.; Cramer, C. J.; Truhlar, D. G. Universal solvation model based on solute electron density and on a continuum model of the solvent defined by the bulk dielectric constant and atomic surface tensions. *J. Phys. Chem*. B. **2009**, *113*, 6378-6396.

8 Lu, T.; Chen, F. Multiwfn: A multifunctional wavefunction analyzer. *J. Comput. Chem*, **2012**, *33*, 580-592.

9. Humphrey, W.; Dalke, A. and Schulten, K. VMD - Visual Molecular Dynamics. *J. Molec. Graphics*, **1996**, *14*, 33-38.

10. Legault, C. Y. CYLview20. http://www.cylview.org (accessed May 31).

**9. Amplified experiment**

A 40 mL equipped with a magnetic stir bar was subsequently charged withTEMPO (10 mol%), **A1** (466 mg, 3.0 mmol, 1 equiv.), carbonyl substrates **B1** (1.35 g, 9.0 mmol, 3 equiv.), *n*-Bu4NBF4 (988 mg, 0.1 M), DMF (30 mL) and AcOH (172 uL, 3.0 mmol, 1 equiv.) under air condition. After fully stirring and dissolution, a graphite plate anode and a zinc plate cathode were installed. Then the cell was electrolyzed at room temperature under a constant current of 40 mA for 80 hours. Upon the completion of electrolysis, the resulting mixture was poured into saturated NH4Cl solution (100 mL) and the electrodes and cell were rinsed with EtOAc, then extracted the mixture with EtOAc (80 mL × 3). The combined organic layers were dried over anhydrous Na2SO4, filtered, and concentrated under reduced pressure. The resultant residue was purified by preparative TLC on silica to afford desired product **C1**.

(Note: The electrodes employed in the scaled-up experiment maintain identical specifications to those utilized in the standard conditions. The effective immersion areas of graphite anode and zinc cathode are approximately 2.8 cm2.)

**10. Product Derivatizations**

**Figure S12. Product derivatizations.**

We have carried out product derivatization to showcase the synthetic utility of these new protocols (Figure S12). Several functionalization products could be synthesized via dehydration (**D3**), acylation (**D6**), esterification (**D7**). In addition, alkene product **D3** underwent hydroboration-oxidation reaction to form *β*-pyridyl alcohol species **D4**, and product **D5** can be afforded through the oxidation of **D3** with m-chloroperoxybenzoic acid (m-CPBA).

**4-(1-(4-methoxyphenyl)vinyl)-2-phenylpyridine (D3)**: To a 10 mL round bottom flask equipped with a magnetic stir bar was charged with **C1** (61.2 mg, 0.2 mmol) and Toluene (2 mL). Then HCl (50 ul, 0.6 mmol, 12 mol/L) was added dropwise to the solution under vigorous stirring and further reacted at room temperature for 20 hours. After the reaction completion, Na2CO3 (106 mg, 1 mmol) was slowly added to the mixture (**Caution: Care should be exercised as the reaction is exothermic and accompanied by gas evolution.**). After cooling the reaction to room temperature, the mixture was stirred for an additional 3 hours. Finally, the resulting mixture was poured into saturated NH4Cl solution (10 mL) and extracted with EtOAc (15 mL × 3). The combined organic layers were dried over anhydrous Na2SO4, filtered, and concentrated under reduced pressure. The resultant residue was purified by silica gel chromatography to give the desired product **D3** (49.1 mg, 85% yield).

**2-(4-methoxyphenyl)-2-(2-phenylpyridin-4-yl)ethan-1-ol (D4)**: To a 10 mL round bottom flask equipped with a magnetic stir bar was charged with **D3** (57.5 mg, 0.2 mmol) and dry THF (2 mL). Then BH3**·**THF (1.0 ml, 1.0 mmol, 1.0 mol/L in THF) was added dropwise to the solution under vigorous stirring and further reacted at room temperature for 20 hours. After the reaction completion, KOH (33.7 mg, 0.6 mmol) and H2O2 (86 uL, 1 mmol, 35% wt in H2O) was added to the mixture. The mixture was stirred for an additional 6 hours. Finally, the resulting mixture was poured into saturated NH4Cl solution (10 mL) and extracted with EtOAc (15 mL × 3). The combined organic layers were dried over anhydrous Na2SO4, filtered, and concentrated under reduced pressure. The resultant residue was purified by silica gel chromatography to give the desired product **D4** (53.7 mg, 88% yield).

**4-(1-((3-chlorobenzoyl)oxy)-2-hydroxy-1-(4-methoxyphenyl)ethyl)-2-phenylpyridine 1-oxide (D5)**: To a 10 mL round bottom flask equipped with a magnetic stir bar was subsequently charged with **D3** (57.5 mg, 0.2 mmol), m-CPBA (86.5 mg, 0.5 mmol) and THF (2 mL). After fully stirring and dissolution, the mixture was further reacted under room temperature for 20 hours. Then Na2SO3 (75.6 mg, 0.6 mmol) and H2O (1 mL) was added to the mixture. Upon the reaction completion, the resulting mixture was poured into saturated NH4Cl solution (10 mL) and extracted the mixture with EtOAc (15 mL × 3). The combined organic layers were dried over anhydrous Na2SO4, filtered, and concentrated under reduced pressure. The resultant residue was purified by silica gel chromatography to give the desired product **D5** (47.3 mg, 50% yield).

**(2-(4-(1-hydroxy-1-(4-methoxyphenyl)ethyl)pyridin-2-yl)phenyl)(phenyl)methanone** **(D6)**: The preparation of **D6** was performed according to the literature procedure. To a 10 mL oven-dried seal tube equipped with a magnetic stir bar, PdCl2 (1.8 mg, 0.01 mmol) and **C1** (61.2 mg, 0.2 mmol) were dissolved in chlorobenzene (0.5 mL). Then benzyl alcohol (0.6 mmol, 3 equiv.) and tert-butyl hydroperoxide (77.2 mg, 0.6 mmol, 70% wt. in H2O) were sequentially added to the mixture. The tube was sealed, and the solution was stirred at 140 °C for 24 h (The reaction is less sensitive to air, no need Schlenk technique to remove the oxygen in the tube and solvent). After cooling the reaction mixture to room temperature, the mixture was filtered through a pad of silica gel and washed with ethyl acetate. The solvent was removed under reduced pressure and the residue was purified by silica gel chromatography to give desired product **D6** (31.7 mg, 39% yield). **[Caution: Care should be exercised when heating solvents above their boiling point in sealed flasks. In addition to standard engineering 51 controls (goggles, fume hood sash, thick-walled reaction vessels), a blast shield should also be utilized for this procedure.)]**

**1-(4-methoxyphenyl)-1-(2-phenylpyridin-4-yl)ethyl 2-(4-isobutylphenyl)propanoate (D7)**: To a 10 mL oven-dried seal Schlenk tube equipped with a magnetic stir bar was charged with DL-ibuprofen (49.5 mg, 0.24 mmol), **C1** (61.2 mg, 0.2 mmol) and DMAP (4.9 mg, 0.04 mmol), and placed under a nitrogen atmosphere. After dry DCM (3 mL) was added, DCC (82.5 mg, 0.4 mmol)

was slowly added to the mixture. The tube was sealed and stirred for 24 hours at room temperature. Upon the reaction completion,the resulting mixture was quenched with H2O (20 mL) and extracted with EtOAc (30 mL × 3). The combined organic layers were dried over anhydrous Na2SO4, filtered, and concentrated under reduced pressure. The resultant residue was purified by silica gel chromatography to give the desired product **D7** (50.6 mg, 51% yield, dr = 1.8:1).

**11. Characterization of the Obtained Products**

Isolated yield of major regioisomeric products is given;The regioisomeric ratio was determined by GC-MS, the regioisomeric ratio > 20:1 unless otherwise mentioned.

1-(4-methoxyphenyl)-1-(2-phenylpyridin-4-yl)ethan-1-ol (**C1**)

White
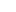
solid; (49.5
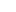
mg, 81%
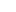
yield); 1H
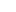
NMR (400
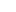
MHz,
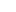
CDCl3) δ 8.59 (d,
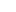
*J* = 5.2 Hz,
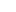
1H), 7.95 (d,
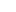
*J* = 7.4 Hz,
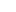
2H), 7.80 (s,
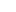
1H), 7.43 (dt,
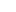
*J* = 15.1, 7.0 Hz,
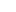
3H), 7.35 (d,
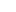
*J* = 8.7 Hz,
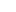
2H), 7.23 (d,
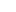
*J* = 4.9 Hz,
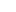
1H), 6.87 (d, *J* = 8.7 Hz, 2H), 3.80 (s, 3H), 2.41 (s, 1H), 1.96 (s, 3H). 13C NMR (126 MHz, CDCl3) δ 158.9, 157.9, 157.5, 149.5, 139.5, 138.6, 128.9, 128.7, 127.2, 127.0, 119.3, 117.6, 113.8, 75.3, 55.3, 30.4. Calcd. for C20H20NO2 [M+H]+: 306.1489; found: 306.1491.

1-phenyl-1-(2-phenylpyridin-4-yl)ethan-1-ol (**C2**)

White
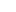
solid; (33.6
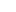
mg, 61%
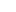
yield, **C2/C2'** = 16:1); 1H
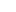
NMR (400
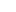
MHz,
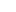
CDCl3) δ 8.57 (d,
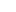
*J* = 5.2 Hz,
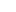
1H), 7.94 (d,
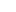
*J* = 7.1 Hz,
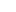
2H), 7.81 (s,
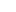
1H), 7.48
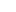
– 7.38 (m,
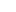
5H), 7.38
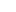
– 7.27 (m,
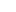
3H), 7.23 (dd, *J* = 5.2, 1.8 Hz, 1H), 2.65 (s, 1H), 1.98 (s, 3H). 13C NMR (126 MHz, CDCl3) δ 157.6, 149.5, 146.3, 139.4, 128.9, 128.6, 128.5, 127.6, 127.0, 125.8, 119.3, 117.6, 75.6, 30.2. HRMS (ESI): Calcd. for C19H18NO [M+H]+: 276.1383; found: 276.1384.

1-(4-butylphenyl)-1-(2-phenylpyridin-4-yl)ethan-1-ol (**C3**)

White
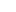
solid; (48.9
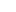
mg, 74%
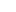
yield, **C3/C3'** = 16:1); 1H
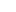
NMR (400
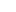
MHz,
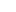
CDCl3) δ 8.58 (d,
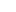
*J* = 5.2 Hz,
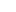
1H), 7.95 (d,
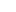
*J* = 7.0 Hz,
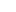
2H), 7.82 (s,
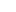
1H), 7.47
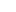
– 7.39 (m,
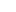
3H), 7.34 (d,
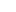
*J* = 8.3 Hz,
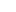
2H), 7.23 (dd,
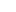
*J* = 5.2, 1.7 Hz,
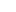
1H), 7.15 (d, *J* = 8.3 Hz, 2H), 2.61 – 2.57 (m, 2H), 2.46 (s, 1H), 1.97 (s, 3H), 1.58 (tt, *J* = 7.2, 1.7 Hz, 2H), 1.39 – 1.33 (m, 2H), 0.92 (t, *J* = 7.3 Hz, 3H). 13C NMR (126 MHz, CDCl3) δ 157.8, 157.5, 149.5, 143.6, 142.4, 139.5, 128.8, 128.6, 128.5, 127.0, 125.7, 119.3, 117.6, 75.5, 35.1, 33.4, 30.2, 22.3, 13.9.HRMS (ESI): Calcd. for C23H26NO [M+H]+: 332.2009; found: 332.2011.
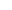


1-(4-cyclohexylphenyl)-1-(2-phenylpyridin-4-yl)ethan-1-ol (**C4**)

White
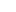
solid; (46.4
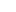
mg, 65%
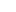
yield); 1H
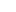
NMR (500
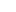
MHz,
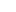
CDCl3) δ 8.56 (d,
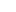
*J* = 5.2 Hz,
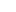
1H), 7.95 (d,
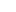
*J* = 7.1 Hz,
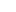
2H), 7.83 (s,
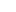
1H), 7.44 (t,
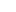
*J* = 7.3 Hz,
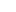
2H), 7.39 (t,
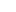
*J* = 7.3 Hz,
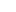
1H), 7.34 (d, *J* = 8.3 Hz, 2H), 7.23 (dd, *J* = 5.3, 1.7 Hz, 1H), 7.17 (d, *J* = 8.2 Hz, 2H), 2.79 (d, *J* = 57.7 Hz, 1H), 2.48 (qd, *J* = 7.3, 6.2, 3.2 Hz, 1H), 1.95 (s, 3H), 1.91 – 1.69 (m, 6H), 1.39 (t, *J* = 11.0 Hz, 4H). 13C NMR (126 MHz, CDCl3) δ 157.8, 157.5, 149.4, 147.4, 143.7, 139.5, 128.8, 128.6, 127.0, 126.9, 125.8, 119.4, 117.6, 75.4, 44.1, 34.3, 30.2, 26.8, 26.1. HRMS (ESI): Calcd. for C25H28NO [M+H]+: 358.2165; found: 358.2168.

1-(4-fluorophenyl)-1-(2-phenylpyridin-4-yl)ethan-1-ol (**C5**)

White
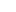
solid; (37.0 mg, 63%
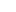
yield, **C5/C5'** = 10:1); 1H
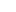
NMR (400
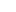
MHz,
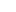
CDCl3) δ 8.56 (d,
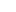
*J* = 5.2 Hz,
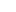
1H), 7.92 (d,
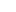
*J* = 6.8 Hz,
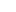
2H), 7.77 (s,
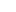
1H), 7.47
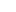
– 7.37 (m,
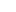
5H), 7.20 (dd,
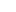
*J* = 5.2, 1.8 Hz,
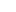
1H), 7.01 (t,
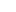
*J* = 8.7 Hz, 2H), 2.77 (s, 1H), 1.95 (s, 3H). 13C NMR (126 MHz, CDCl3) δ 162.0 (d, *J* = 246.8 Hz), 157.6 (d, *J* = 28.3 Hz), 149.5, 142.3 (d,
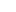
*J* = 3.2 Hz),
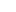
139.3, 129.0,
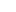
128.7, 127.7 (d,
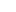
*J* = 8.2 Hz),
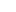
127.0, 119.2, 117.6, 115.3, 115.1, 75.2, 30.3. 19F NMR (376 MHz, CDCl3) δ -114.85. HRMS (ESI): Calcd. for C19H17FNO [M+H]+: 294.1289; found: 294.1290.

1-(4-chlorophenyl)-1-(2-phenylpyridin-4-yl)ethan-1-ol (**C6**)

White solid; (30.3 mg, 49% yield, **C6/C6'** = 9:1); 1H NMR (500 MHz, CDCl3) δ 8.61 (d, *J* = 5.2 Hz, 1H), 7.94 (d, *J* = 7.4 Hz, 2H), 7.78 (s, 1H), 7.46 (t, *J* = 7.4 Hz, 2H), 7.41 (d, *J* = 7.1 Hz, 1H), 7.38 (d, *J* = 8.6 Hz, 2H), 7.31 (d, *J* = 8.6 Hz, 2H), 7.22 (dd, *J* = 5.2, 1.8 Hz, 1H), 2.39 (s, 1H), 1.98 (s, 3H). 13C NMR (126 MHz, CDCl3) δ 157.8, 156.9, 149.7, 144.9, 139.3, 133.5, 129.0, 128.7, 128.6, 127.3, 127.0, 119.2, 117.4, 75.3, 30.3. HRMS (ESI): Calcd. for C19H17ClNO [M+H]+: 310.0993; found: 310.0996.

1-(3-methoxyphenyl)-1-(2-phenylpyridin-4-yl)ethan-1-ol (**C7**)

White solid; (37.8 mg, 62% yield); 1H NMR (400 MHz, CDCl3) δ 8.59 (d, *J* = 5.2 Hz, 1H), 7.95 (d, *J* = 7.0 Hz, 2H), 7.81 (s, 1H), 7.49 – 7.37 (m, 3H), 7.29 – 7.23 (m, 2H), 7.05 – 6.97 (m, 2H), 6.87 – 6.75 (m, 1H), 3.78 (s, 3H), 2.47 (s, 1H), 1.97 (s, 3H). 13C NMR (126 MHz, CDCl3) δ 159.7, 157.6, 157.4, 149.6, 148.1, 139.5, 129.5, 128.9, 128.7, 127.0, 119.3, 118.2, 117.5, 112.6, 112.1, 75.6, 55.3, 30.2.HRMS (ESI): Calcd. for C20H20NO2 [M+H]+: 306.1489; found: 306.1490.

1-(2-methoxyphenyl)-1-(2-phenylpyridin-4-yl)ethan-1-ol (**C8**)

Colorless oil; (46.4 mg, 76% yield, **C8/C8'** = 18:1); 1H NMR (400 MHz, CDCl3) δ 8.54 (d, *J* = 5.2 Hz, 1H), 7.94 (d, *J* = 7.1 Hz, 2H), 7.73 (s, 1H), 7.51 (dd, *J* = 7.7, 1.7 Hz, 1H), 7.47 – 7.42 (m, 2H), 7.41 – 7.37 (m, 1H), 7.37 – 7.32 (m, 1H), 7.12 – 7.05 (m, 2H), 6.90 (d, *J* = 8.1 Hz, 1H), 4.67 (s, 1H), 3.60 (s, 3H), 1.85 (s, 3H). 13C NMR (126 MHz, CDCl3) δ 159.7, 157.1, 156.8, 149.2, 139.6, 133.5, 129.4, 128.8, 128.6, 126.9, 126.9, 121.1, 118.6, 116.7, 112.0, 75.7, 55.5, 29.5. HRMS (ESI): Calcd. for C20H20NO2 [M+H]+: 306.1489; found: 306.1491.

1-(2-phenylpyridin-4-yl)-1-(o-tolyl)ethan-1-ol (**C9**)

White solid; (35.3 mg, 61% yield); 1H NMR (400 MHz, CDCl3) δ 8.56 (d, *J* = 5.2 Hz, 1H), 7.95 (d, *J* = 6.9 Hz, 2H), 7.76 (s, 1H), 7.69 – 7.62 (m, 1H), 7.48 – 7.39 (m, 3H), 7.30 – 7.27 (m, 2H), 7.17 – 7.14 (m, 1H), 7.12 (dd, *J* = 5.2, 1.7 Hz, 1H), 2.49 (s, 1H), 2.07 (s, 3H), 1.96 (s, 3H). 13C NMR (126 MHz, CDCl3) δ 157.9, 157.4, 149.5, 142.8, 139.4, 137.6, 132.7, 128.9, 128.6, 128.3, 127.0, 126.0, 125.5, 119.0, 117.1, 76.3, 32.6, 21.4.HRMS (ESI): Calcd. for C20H20NO [M+H]+: 290.1539; found: 290.1543.

1-(3,4-dimethoxyphenyl)-1-(2-phenylpyridin-4-yl)ethan-1-ol (**C10**)

Yellow solid; (31.5 mg, 47% yield); 1H NMR (500 MHz, CDCl3) δ 8.60 (d, *J* = 5.2 Hz, 1H), 7.95 (d, *J* = 7.6 Hz, 2H), 7.81 (s, 1H), 7.45 (t, *J* = 7.7 Hz, 2H), 7.41 (d, *J* = 7.3 Hz, 1H), 7.23 (d, *J* = 5.2 Hz, 1H), 6.96 (d, *J* = 7.3 Hz, 2H), 6.83 (d, *J* = 8.8 Hz, 1H), 3.87 (s, 3H), 3.83 (s, 3H), 2.42 (s, 1H), 1.96 (s, 3H). 13C NMR (126 MHz, CDCl3) δ 157.7, 157.5, 149.5, 148.9, 148.5, 139.5, 139.0, 128.9, 128.7, 127.0, 119.3, 118.1, 117.5, 110.6, 109.6, 75.5, 55.9, 55.9, 30.5.HRMS (ESI): Calcd. for C21H22NO3 [M+H]+: 336.1594; found: 336.1595.

ethyl 4-(1-hydroxy-1-(4-(trifluoromethyl)phenyl)ethyl)picolinate (**C11**)

Colorless oil; (27.1 mg, 40% yield, **C11/C11'** = 11:1); 1H NMR (400 MHz, CDCl3) δ 8.64 (d, *J* = 5.0 Hz, 1H), 8.19 – 8.11 (m, 1H), 7.62 – 7.49 (m, 5H), 4.45 (q, *J* = 7.1 Hz, 2H), 2.84 (s, 1H), 2.00 (s, 3H), 1.42 (t, *J* = 7.1 Hz, 3H). 13C NMR (126 MHz, CDCl3) δ 165.2, 157.4, 150.0, 149.7, 148.5, 129.9 (q, *J* = 32.5 Hz), 126.1, 125.5 (q, *J* = 3.7 Hz), 123.9 (q, *J* = 272.0 Hz), 123.7, 121.9, 75.1, 62.1, 30.0, 14.3. 19F NMR (376 MHz, CDCl3) δ -62.64. HRMS (ESI): Calcd. for C17H17F3NO3 [M+H]+: 340.1155; found: 340.1156.

1-(2-phenylpyridin-4-yl)-1-(thiophen-3-yl)ethan-1-ol (**C12**)

Yellow solid; (19.1 mg, 34% yield); 1H NMR (500 MHz, CDCl3) δ 8.61 (d, *J* = 4.0 Hz, 1H), 7.96 (d, *J* = 7.5 Hz, 2H), 7.83 (s, 1H), 7.47 (t, *J* = 7.2 Hz, 2H), 7.41 (t, *J* = 7.2 Hz, 1H), 7.32 – 7.29 (m, 1H), 7.27 – 7.25 (m, 2H), 7.02 (d, *J* = 5.0 Hz, 1H), 2.66 (s, 1H), 1.97 (s, 3H). 13C NMR (126 MHz, CDCl3) δ 157.6, 157.0, 149.5, 148.1, 139.4, 128.9, 128.7, 127.0, 126.6, 126.4, 121.3, 119.0, 117.3, 117.3, 73.8, 30.7.HRMS (ESI): Calcd. for C17H16NOS [M+H]+:282.0947; found: 282.0949.

4-(2-phenylpyridin-4-yl)chroman-4-ol (**C13**)

White solid; (36.1 mg, 60% yield); 1H NMR (500 MHz, CDCl3) δ 8.61 (d, *J* = 5.0 Hz, 1H), 7.96 (d, *J* = 7.6 Hz, 2H), 7.82 (s, 1H), 7.46 (t, *J* = 7.4 Hz, 2H), 7.40 (t, *J* = 7.2 Hz, 1H), 7.26 – 7.19 (m, 2H), 6.94 (d, *J* = 8.3 Hz, 1H), 6.86 (dt, *J* = 14.7, 7.7 Hz, 2H), 4.41 (td, *J* = 11.4, 2.3 Hz, 1H), 4.32 (dt, *J* = 11.2, 3.8 Hz, 1H), 2.59 (s, 1H), 2.37 – 2.31 (m, 1H), 2.20 (dt, *J* = 14.4, 3.0 Hz, 1H). 13C NMR (126 MHz, CDCl3) δ 157.6, 156.9, 155.1, 149.5, 139.4, 130.2, 129.0, 129.0, 128.7, 127.1, 126.6, 121.2, 120.0, 118.2, 117.6, 71.0, 62.8, 39.1. HRMS (ESI): Calcd. for C20H18NO2 [M+H]+: 304.1332; found: 304.1333.

1-(2-phenylpyridin-4-yl)-2,3-dihydro-1H-inden-1-ol (**C14**)

White solid; (40.7 mg, 71% yield); 1H NMR (500 MHz, CDCl3) δ 8.55 (d, *J* = 4.1 Hz, 1H), 7.94 (d, *J* = 8.0 Hz, 2H), 7.80 (s, 1H), 7.41 (dt, *J* = 24.4, 7.7 Hz, 3H), 7.33 (q, *J* = 7.5 Hz, 2H), 7.23 – 7.18 (m, 2H), 7.05 (dd, *J* = 7.7, 3.1 Hz, 1H), 3.23 (dtd, *J* = 15.6, 7.5, 3.3 Hz, 1H), 3.02 (ddd, *J* = 16.2, 7.8, 3.4 Hz, 1H), 2.84 (s, 1H), 2.50 (td, *J* = 7.4, 7.0, 3.0 Hz, 2H). 13C NMR (126 MHz, CDCl3) δ 157.4, 149.4, 146.9, 144.1, 139.4, 129.0, 128.9, 128.8, 128.6, 127.3, 127.0, 125.1, 123.9, 119.4, 117.7, 84.8, 44.5, 30.0.HRMS (ESI): Calcd. for C20H18NO [M+H]+: 288.1383; found: 288.1387.

1-(2-phenylpyridin-4-yl)-1-(p-tolyl)propan-1-ol (**C15**)

White solid; (44.9 mg, 74% yield); 1H NMR (500 MHz, CDCl3) δ 8.56 (d, *J* = 5.1 Hz, 1H), 7.96 (d, *J* = 7.3 Hz, 2H), 7.82 (s, 1H), 7.45 (t, *J* = 7.4 Hz, 2H), 7.40 (t, *J* = 7.3 Hz, 1H), 7.34 (d, *J* = 8.1 Hz, 2H), 7.23 (dd, *J* = 5.3, 1.7 Hz, 1H), 7.15 (d, *J* = 7.9 Hz, 2H), 2.44 (s, 1H), 2.33 (s, 5H), 0.91 (t, *J* = 7.3 Hz, 3H). 13C NMR (126 MHz, CDCl3) δ 157.4, 156.5, 149.3, 142.7, 139.5, 137.1, 129.1, 128.8, 128.6, 127.0, 125.9, 119.6, 117.9, 77.7, 33.9, 20.9, 7.9.HRMS (ESI): Calcd. for C21H22NO [M+H]+: 304.1696; found: 304.1699.

cyclohexyl(phenyl)(2-phenylpyridin-4-yl)methanol (**C16**)

White solid; (41.9 mg, 61% yield, **C16/C16'** = 15:1); 1H NMR (500 MHz, CDCl3) δ 8.58 (d, *J* = 5.2 Hz, 1H), 7.97 (d, *J* = 7.6 Hz, 2H), 7.89 (s, 1H), 7.55 (d, *J* = 7.8 Hz, 2H), 7.47 (t, *J* = 7.5 Hz, 2H), 7.41 (t, *J* = 7.3 Hz, 1H), 7.33 (q, *J* = 6.0, 4.4 Hz, 3H), 7.23 (t, *J* = 7.3 Hz, 1H), 2.48 (t, *J* = 11.6 Hz, 1H), 2.36 (s, 1H), 1.77 (d, *J* = 11.3 Hz, 2H), 1.74 – 1.65 (m, 2H), 1.51 (d, *J* = 12.7 Hz, 1H), 1.35 – 1.29 (m, 2H), 1.21 – 1.06 (m, 3H). 13C NMR (126 MHz, CDCl3) δ 157.3, 155.9, 149.3, 144.9, 139.5, 128.7, 128.5, 128.3, 126.9, 126.8, 125.5, 119.2, 117.6, 79.9, 45.3, 26.9, 26.8, 26.4, 26.4, 26.2. HRMS (ESI): Calcd. for C24H26NO [M+H]+: 344.2009; found: 344.2010.

1-phenyl-1-(2-phenylpyridin-4-yl)butan-1-ol (**C17**)

White solid; (35.9 mg, 59% yield); 1H NMR (500 MHz, CDCl3) δ 8.55 (d, *J* = 5.2 Hz, 1H), 7.94 (d, *J* = 7.6 Hz, 2H), 7.80 (s, 1H), 7.44 (t, *J* = 7.1 Hz, 4H), 7.39 (t, *J* = 7.2 Hz, 1H), 7.33 (t, *J* = 7.6 Hz, 2H), 7.26 – 7.20 (m, 2H), 2.48 (s, 1H), 2.27 (t, 2H), 1.42 – 1.36 (m, 1H), 1.27 – 1.24 (m, 1H), 0.94 (t, *J* = 7.3 Hz, 3H). 13C NMR (126 MHz, CDCl3) δ 157.5, 156.6, 149.4, 145.8, 139.5, 128.8, 128.6, 128.4, 127.4, 127.0, 125.9, 119.6, 117.9, 77.7, 43.6, 16.9, 14.3.HRMS (ESI): Calcd. for C21H22NO [M+H]+: 304.1696; found: 304.1699.

1-(4-fluorophenyl)-1-(2-phenylpyridin-4-yl)butan-1-ol (**C18**)

White solid; (43.0 mg, 67% yield, **C18/C18'** = 16:1); 1H NMR (500 MHz, CDCl3) δ 8.54 (d, *J* = 2.8 Hz, 1H), 7.94 (d, *J* = 7.2 Hz, 2H), 7.78 (s, 1H), 7.47 – 7.39 (m, 5H), 7.20 (d, *J* = 5.0 Hz, 1H), 7.01 (t, *J* = 8.6 Hz, 2H), 2.64 (s, 1H), 2.24 (t, *J* = 8.2 Hz, 2H), 1.42 – 1.35 (m, 1H), 1.27 – 1.21 (m, 1H), 0.94 (t, *J* = 7.3 Hz, 3H). 13C NMR (126 MHz, CDCl3) δ 162.8, 160.8, 157.5, 156.5, 149.4, 141.7, 141.6, 139.3, 128.9, 128.6, 127.7, 127.7, 127.0, 119.4, 117.8, 115.2, 115.0, 43.7, 16.8, 14.2. 19F NMR (376 MHz, CDCl3) δ -115.15. HRMS (ESI): Calcd. for C21H21FNO [M+H]+: 322.1602; found: 322.1605.

1,2-diphenyl-1-(2-phenylpyridin-4-yl)ethan-1-ol (**C19**)

White solid; (33.7 mg, 48% yield); 1H NMR (500 MHz, CDCl3) δ 8.57 (d, *J* = 5.2 Hz, 1H), 7.90 (d, *J* = 7.1 Hz, 2H), 7.75 (s, 1H), 7.50 (d, *J* = 7.3 Hz, 2H), 7.43 (t, *J* = 7.3 Hz, 2H), 7.39 (d, *J* = 7.0 Hz, 1H), 7.34 (d, *J* = 7.8 Hz, 2H), 7.28 (d, *J* = 7.2 Hz, 1H), 7.24 (dd, *J* = 3.4, 1.8 Hz, 1H), 7.20 – 7.15 (m, 3H), 6.93 (d, *J* = 7.5 Hz, 2H), 3.66 (q, *J* = 13.4 Hz, 2H), 2.55 (s, 1H). 13C NMR (126 MHz, CDCl3) δ 157.4, 156.0, 149.4, 145.2, 139.5, 134.9, 130.8, 128.9, 128.6, 128.4, 128.3, 127.5, 127.1, 127.0, 126.0, 119.7, 118.1, 77.4, 47.3.HRMS (ESI): Calcd. for C25H22NO [M+H]+: 352.1696; found: 352.1697.

1,1,1-trifluoro-3-phenyl-2-(2-phenylpyridin-4-yl)propan-2-ol (**C20**)

White solid; (30.8 mg, 45% yield, **C20/C20'** = 16:1); 1H NMR (500 MHz, CDCl3) δ 8.69 (d, *J* = 5.2 Hz, 1H), 7.95 (d, *J* = 7.4 Hz, 2H), 7.85 (s, 1H), 7.47 (t, *J* = 7.4 Hz, 2H), 7.42 (t, 1H), 7.39 (d, *J* = 5.4 Hz, 1H), 7.24 – 7.20 (m, 3H), 7.01 (d, *J* = 7.4 Hz, 2H), 3.45 (q, 2H), 2.79 (s, 1H). 13C NMR (126 MHz, CDCl3) δ 157.9, 149.7, 147.0, 139.0, 132.2, 130.6, 129.2, 128.8, 128.7, 127.9, 127.1, 125.1 (q, *J* = 286.02 Hz), 119.6, 118.3, 76.8 (q,*J* = 27.72 Hz), 41.7. 19F NMR (376 MHz, CDCl3) δ -77.75. HRMS (ESI): Calcd. for C20H17F3NO [M+H]+: 344.1257;found: 344.1262.

1,1,1-trifluoro-2-(2-phenylpyridin-4-yl)butan-2-ol (**C21**)

White solid; (27.0 mg, 48% yield, **C21/C21'** = 15:1); 1H NMR (500 MHz, CDCl3) δ 8.71 (d, *J* = 5.3 Hz, 1H), 8.00 (d, *J* = 7.6 Hz, 2H), 7.92 (s, 1H), 7.49 (t, *J* = 7.5 Hz, 2H), 7.43 (t, *J* = 7.3 Hz, 1H), 7.38 (d, *J* = 5.3 Hz, 1H), 2.99 (s, 1H), 2.28 – 2.21 (m, 1H), 2.13 – 2.05 (m, 1H), 0.81 (t, *J* = 7.5 Hz, 3H). 13C NMR (126 MHz, CDCl3) δ 158.0, 149.7, 146.3, 139.1, 129.2, 128.8, 127.1, 125.4 (q, *J* = 286.0 Hz), 119.8, 118.4, 77.3 (q, *J* = 28.0 Hz), 28.2, 6.5. 19F NMR (376 MHz, CDCl3) δ -79.47. HRMS (ESI): Calcd. for C15H15F3NO [M+H]+: 282.1100; found: 282.1102.

1-cyclohexyl-2,2,2-trifluoro-1-(2-phenylpyridin-4-yl)ethan-1-ol (**C22**)

White solid; (31.4 mg, 47% yield, **C22/C22'** = 16:1); 1H NMR (500 MHz, CDCl3) δ 8.70 (d, *J* = 5.2 Hz, 1H), 8.01 (d, *J* = 7.5 Hz, 2H), 7.91 (s, 1H), 7.49 (dd, *J* = 8.3, 6.9 Hz, 2H), 7.43 (t, *J* = 7.3 Hz, 1H), 7.38 (d, *J* = 5.3 Hz, 1H), 2.77 (s, 1H), 2.12 (t, *J* = 11.7 Hz, 1H), 2.05 (d, *J* = 13.0 Hz, 1H), 1.86 (d, *J* = 13.2 Hz, 1H), 1.67 (dd, *J* = 6.2, 3.0 Hz, 2H), 1.33 (qt, *J* = 12.9, 3.6 Hz, 2H), 1.20 – 1.06 (m, 4H). 13C NMR (126 MHz, CDCl3) δ 157.8, 149.7, 147.8, 139.2, 129.2, 128.8, 127.1, 125.5 (q, *J* = 287.8 Hz), 119.2, 117.7, 79.7 (q, *J* = 27.1 Hz), 43.7, 26.49, 26.47, 26.3, 26.1, 25.8. 19F NMR (376 MHz, CDCl3) δ -77.75. HRMS (ESI): Calcd. for C19H21F3NO [M+H]+: 336.1570; found: 336.1573.

2-(2-phenylpyridin-4-yl)pent-3-en-2-ol (**C23a**)

Light yellow solid; (11.0 mg, 23% yield); 1H NMR (500 MHz, CDCl3) δ 8.63 (d, *J* = 5.1 Hz, 1H), 7.99 (d, *J* = 7.5 Hz, 2H), 7.82 (s, 1H), 7.47 (t, *J* = 7.5 Hz, 2H), 7.41 (t, *J* = 7.3 Hz, 1H), 7.29 (dd, *J* = 5.2, 1.8 Hz, 1H), 5.85 – 5.68 (m, 2H), 2.01 (s, 1H), 1.74 (d, *J* = 5.6 Hz, 3H), 1.66 (s, 3H). 13C NMR (126 MHz, CDCl3) δ 157.6, 156.9, 149.5, 139.6, 136.9, 128.9, 128.7, 127.1, 125.4, 118.9, 117.3, 74.0, 29.6, 17.7.HRMS (ESI): Calcd. for C16H18NO [M+H]+: 240.1383; found: 240.1384.

4-(2-phenylpyridin-4-yl)pentan-2-one (**C23b**)

Light yellow oil; (20.7 mg, 43% yield); 1H NMR (500 MHz, CDCl3) δ 8.58 (d, *J* = 5.1 Hz, 1H), 7.96 (d, *J* = 7.2 Hz, 2H), 7.56 (s, 1H), 7.47 (t, *J* = 7.5 Hz, 2H), 7.40 (t, *J* = 7.3 Hz, 1H), 7.08 (dd, *J* = 5.2, 1.7 Hz, 1H), 3.43 – 3.33 (m, 1H), 2.81 (dd, *J* = 17.0, 6.5 Hz, 1H), 2.72 (dd, *J* = 17.1, 7.5 Hz, 1H), 2.11 (s, 3H), 1.30 (d, *J* = 7.0 Hz, 3H). 13C NMR (126 MHz, CDCl3) δ 206.6, 157.8, 155.8, 149.8, 139.5, 128.9, 128.7, 126.9, 120.6, 119.3, 50.9, 34.7, 30.5, 21.2.HRMS (ESI): Calcd. for C16H18NO [M+H]+: 240.1383; found: 240.1384.

phenyl(2-phenylpyridin-4-yl)methanol (**C24**)

Colorless oil; (18.1 mg, 35% yield); 1H NMR (400 MHz, CDCl3) δ 8.56 (d, *J* = 5.1 Hz, 1H), 7.93 (d, *J* = 7.0 Hz, 2H), 7.75 (s, 1H), 7.47 – 7.39 (m, 3H), 7.37 – 7.29 (m, 5H), 7.21 (dd, *J* = 5.0, 1.7 Hz, 1H), 5.81 (s, 1H), 3.09 (s, 1H). 13C NMR (126 MHz, CDCl3) δ 157.6, 153.3, 149.6, 142.6, 139.3, 129.0, 128.8, 128.7, 128.2, 127.0, 126.8, 119.8, 118.1, 75.2. HRMS (ESI): Calcd. for C18H16NO [M+H]+: 262.1226; found: 262.1228.

(4-methoxyphenyl)(2-phenylpyridin-4-yl)methanol (**C25**)

Light yellow oil; (40.7 mg, 70% yield); 1H NMR (400 MHz, CDCl3) δ 8.60 (d, *J* = 5.1 Hz, 1H), 7.95 (d, *J* = 7.1 Hz, 2H), 7.76 (s, 1H), 7.48 – 7.37 (m, 3H), 7.28 (d, *J* = 8.7 Hz, 2H), 7.22 (dd, *J* = 5.1, 1.6 Hz, 1H), 6.87 (s, 2H), 5.80 (s, 1H), 3.79 (s, 3H), 2.59 (s, 1H). 13C NMR (126 MHz, CDCl3) δ 159.5, 157.6, 153.5, 149.5, 139.3, 134.9, 128.9, 128.6, 128.2, 127.0, 119.7, 118.0, 114.1, 74.7, 55.2.HRMS (ESI): Calcd. for C19H18NO2 [M+H]+: 292.1332; found: 292.1333.

(2-phenylpyridin-4-yl)(p-tolyl)methanol (**C26**)

White solid; (26.3 mg, 48% yield, **C26/C26'** = 17:1); 1H NMR (500 MHz, Chloroform-*d*) δ 8.56 (d, *J* = 4.9 Hz, 1H), 7.93 (d, *J* = 8.3 Hz, 2H), 7.75 (s, 1H), 7.46 – 7.38 (m, 3H), 7.24 (d, *J* = 8.4 Hz, 2H), 7.20 (d, *J* = 5.2 Hz, 1H), 7.15 (d, *J* = 7.8 Hz, 2H), 5.78 (s, 1H), 3.04 (s, 1H), 2.33 (s, 3H). 13C NMR (126 MHz, CDCl3) δ 157.6, 153.5, 149.5, 139.8, 139.3, 138.1, 129.5, 128.9, 128.6, 127.0, 126.8, 119.7, 118.1, 75.0, 21.1. HRMS (ESI): Calcd. for C19H18NO [M+H]+: 276.1383; found: 276.1387.

(4-(tert-butyl)phenyl)(2-phenylpyridin-4-yl)methanol (**C27**)

White solid; (42.4 mg, 67% yield, **C8/C8'** = 18:1); 1H NMR (500 MHz, CDCl3) δ 8.63 (d, *J* = 5.1 Hz, 1H), 7.98 (d, *J* = 7.3 Hz, 2H), 7.80 (s, 1H), 7.46 (t, *J* = 7.4 Hz, 2H), 7.43 – 7.36 (m, 3H), 7.31 (d, *J* = 8.3 Hz, 2H), 7.25 (d, *J* = 1.4 Hz, 1H), 5.85 (s, 1H), 2.35 (s, 1H), 1.30 (s, 9H). 13C NMR (126 MHz, CDCl3) δ 157.6, 153.4, 151.3, 149.5, 139.7, 139.3, 128.9, 128.7, 127.0, 126.6, 125.8, 119.8, 118.1, 75.0, 34.6, 31.3.HRMS (ESI): Calcd. for C22H24NO [M+H]+: 318.1852; found: 318.1854.

(2-phenylpyridin-4-yl)(thiophen-3-yl)methanol (**C28**)

Yellow oil; (15.1 mg, 28% yield); 1H NMR (500 MHz, CDCl3) δ 8.62 (d, *J* = 3.0 Hz, 1H), 7.95 (d, *J* = 6.2 Hz, 2H), 7.77 (s, 1H), 7.46 (t, *J* = 7.7 Hz, 2H), 7.40 (t, *J* = 7.3 Hz, 1H), 7.30 (dd, *J* = 5.1, 2.9 Hz, 1H), 7.26 – 7.20 (m, 2H), 7.02 (t, *J* = 3.9 Hz, 1H), 5.92 (s, 1H). 13C NMR (126 MHz, CDCl3) δ 157.76, 149.71, 149.66, 143.85, 139.22, 129.03, 128.71, 127.03, 126.87, 126.12, 122.61, 119.72, 118.08, 71.31. HRMS (ESI): Calcd. for C16H13NOS[M+H]+: 268.0791; found: 268.0792.

1-(4-methoxyphenyl)-1-(2-(4-methoxyphenyl)pyridin-4-yl)ethan-1-ol (**C29**)

Yellow solid; (38.7 mg, 58% yield); 1H NMR (500 MHz, CDCl3) δ 8.51 (d, *J* = 5.0 Hz, 1H), 7.89 (d, *J* = 6.8 Hz, 2H), 7.74 (s, 1H), 7.34 (d, *J* = 8.7 Hz, 2H), 7.15 (d, *J* = 5.3 Hz, 1H), 6.96 (d, *J* = 8.7 Hz, 2H), 6.85 (d, *J* = 8.2 Hz, 2H), 3.84 (s, 4H), 3.78 (s, 3H), 2.71 (s, 1H), 1.93 (s, 3H). 13C NMR (126 MHz, CDCl3) δ 160.4, 158.9, 157.9, 157.1, 149.3, 138.7, 132.1, 128.3, 127.2, 118.7, 116.8, 114.0, 113.7, 75.3, 55.3, 55.2, 30.3.HRMS (ESI): Calcd. for C21H22NO3 [M+H]+:336.1594; found: 336.1596.

1-(2-(4-chlorophenyl)pyridin-4-yl)-1-(4-methoxyphenyl)ethan-1-ol (**C30**)

White solid; (49.1 mg, 72% yield); 1H NMR (400 MHz, CDCl3) δ 8.55 (d, *J* = 5.2 Hz, 1H), 7.89 (d, *J* = 8.6 Hz, 2H), 7.78 (s, 1H), 7.40 (d, *J* = 8.6 Hz, 2H), 7.34 (d, *J* = 8.8 Hz, 2H), 7.21 (dd, *J* = 5.2, 1.7 Hz, 1H), 6.86 (d, *J* = 8.8 Hz, 2H), 3.79 (s, 3H), 2.60 (s, 1H), 1.94 (s, 3H). 13C NMR (126 MHz, CDCl3) δ 158.9, 158.1, 156.3, 149.5, 138.5, 137.9, 135.0, 128.8, 128.3, 127.2, 119.6, 117.3, 113.8, 75.3, 55.3, 30.3. HRMS (ESI): Calcd. for C20H19ClNO2 [M+H]+: 340.1099; found: 340.1102.

1-(2-(3-isopropylphenyl)pyridin-4-yl)-1-(4-methoxyphenyl)ethan-1-ol (**C31**)

White solid; (51.9 mg, 75% yield); 1H NMR (400 MHz, CDCl3) δ 8.57 (d, *J* = 5.2 Hz, 1H), 7.85 (s, 1H), 7.80 (s, 1H), 7.71 (d, *J* = 7.7 Hz, 1H), 7.41 – 7.31 (m, 3H), 7.28 (d, *J* = 7.7 Hz, 1H), 7.20 (dd, *J* = 5.2, 1.7 Hz, 1H), 6.86 (d, *J* = 8.8 Hz, 2H), 3.79 (s, 3H), 3.05 – 2.94 (m, 1H), 2.51 (s, 1H), 1.95 (s, 3H), 1.30 (d, *J* = 6.9 Hz, 6H). 13C NMR (126 MHz, CDCl3) δ 158.8, 157.9, 157.8, 149.4, 149.3, 139.5, 138.6, 128.6, 127.2, 126.9, 125.4, 124.6, 119.2, 117.7, 113.7, 75.3, 55.2, 34.2, 30.3, 24.0.HRMS (ESI): Calcd. for C23H26NO2 [M+H]+: 348.1958; found: 348.1959.

1-(4-methoxyphenyl)-1-(2-(3-methoxyphenyl)pyridin-4-yl)ethan-1-ol(**C32**)

Yellow solid; (36.8 mg, 55% yield, **C32/C32'** = 17:1); 1H NMR (500 MHz, CDCl3) δ 8.56 (d, *J* = 5.2 Hz, 1H), 7.78 (s, 1H), 7.54 (s, 1H), 7.49 (d, *J* = 7.7 Hz, 1H), 7.35 (t, *J* = 8.4 Hz, 3H), 7.22 (dd, *J* = 5.2, 1.7 Hz, 1H), 6.95 (dd, *J* = 8.2, 2.6 Hz, 1H), 6.85 (d, *J* = 8.9 Hz, 2H), 3.87 (s, 3H), 3.79 (s, 3H), 2.54 (d, *J* = 5.8 Hz, 1H), 1.94 (s, 3H). 13C NMR (126 MHz, CDCl3) δ 160.0, 158.9, 157.9, 157.9, 157.3, 149.4, 141.0, 138.6, 129.6, 127.2, 119.4, 117.7, 114.9, 113.7, 112.2, 75.3, 55.4, 55.2, 30.3. HRMS (ESI): Calcd. for C21H22NO3 [M+H]+: 336.1594; found: 336.1595.

ethyl 3-(4-(1-hydroxy-1-(4-methoxyphenyl)ethyl)pyridin-2-yl)benzoate (**C33**)

White solid; (62.2 mg, 82% yield); 1H NMR (500 MHz, CDCl3) δ 8.59 (s, 2H), 8.17 (d, *J* = 7.8 Hz, 1H), 8.07 (d, *J* = 7.7 Hz, 1H), 7.87 (s, 1H), 7.52 (t, *J* = 7.8 Hz, 1H), 7.35 (d, *J* = 8.8 Hz, 2H), 7.24 (d, *J* = 3.6 Hz, 1H), 6.86 (d, *J* = 8.9 Hz, 2H), 4.40 (q, *J* = 7.2 Hz, 2H), 3.79 (s, 3H), 2.61 (s, 1H), 1.96 (s, 3H), 1.41 (t, *J* = 7.1 Hz, 3H). 13C NMR (126 MHz, CDCl3) δ 166.5, 158.9, 158.2, 156.5, 149.6, 139.8, 138.5, 131.5, 130.9, 129.9, 128.7, 128.0, 127.2, 119.8, 117.6, 113.8, 75.3, 61.1, 55.2, 30.3, 14.3.HRMS (ESI): Calcd. for C23H24NO4 [M+H]+: 378.1700; found: 378.1703.

1-(4-methoxyphenyl)-1-(2-(o-tolyl)pyridin-4-yl)ethan-1-ol (3-**C34**)

White solid; (40.1 mg, 63% yield); 1H NMR (500 MHz, CDCl3) δ 8.55 (d, *J* = 5.6 Hz, 1H), 7.39 (s, 1H), 7.37 – 7.31 (m, 3H), 7.29 – 7.23 (m, 4H), 6.85 (d, *J* = 7.9 Hz, 2H), 3.79 (s, 3H), 2.79 (s, 1H), 2.28 (s, 3H), 1.91 (s, 3H). 13C NMR (126 MHz, CDCl3) δ 159.7, 158.8, 157.4, 149.0, 140.4, 138.7, 135.7, 130.6, 129.6, 128.2, 127.1, 125.8, 121.2, 118.7, 113.7, 75.1, 55.2, 30.2, 20.2. HRMS (ESI): Calcd. for C21H22NO2 [M+H]+: 320.1645; found: 320.1646.

1-(4-(tert-butyl)phenyl)-1-(2-(4-(trimethylsilyl)phenyl)pyridin-4-yl)ethan-1-ol (**C35**)

White solid; (61.4 mg, 76% yield); 1H NMR (500 MHz, CDCl3) δ 8.48 (d, *J* = 5.2 Hz, 1H), 7.83 (d, *J* = 7.7 Hz, 2H), 7.72 (d, *J* = 1.6 Hz, 1H), 7.50 (d, *J* = 7.8 Hz, 2H), 7.25 (s, 4H), 7.15 (d, *J* = 4.1 Hz, 1H), 2.50 (s, 1H), 1.86 (s, 3H), 1.20 (s, 9H), 0.19 (s, 9H). 13C NMR (126 MHz, CDCl3) δ 157.7, 157.5, 150.5, 149.5, 143.3, 141.3, 139.8, 133.7, 126.2, 125.5, 125.4, 119.4, 117.7, 75.4, 34.4, 31.2, 30.2, -1.2.HRMS (ESI): Calcd. for C26H34NOSi [M+H]+ 404.2404; found: 404.2406.

1-(2-(2,4-difluorophenyl)pyridin-4-yl)-1-(4-methoxyphenyl)ethan-1-ol (**C36**)

White solid; (40.8 mg, 60% yield); 1H NMR (500 MHz, CDCl3) δ 8.57 (d, *J* = 5.7 Hz, 1H), 7.95 – 7.86 (m, 1H), 7.77 (s, 1H), 7.34 (d, *J* = 8.8 Hz, 2H), 7.27 (d, *J* = 3.5 Hz, 1H), 6.99 – 6.94 (m, 1H), 6.90 – 6.84 (m, 3H), 3.79 (s, 3H), 2.71 (s, 1H), 1.94 (s, 3H). 13C NMR (126 MHz, CDCl3) δ 162.9 (dd, *J* = 251.0, 12.0 Hz), 160.4 (dd, *J* = 253.6, 11.4 Hz), 158.9 (d, *J* = 2.1 Hz), 157.7 (dd, *J* = 4.8, 3.2 Hz), 152.5, 149.6 (d, *J* = 2.6 Hz), 138.5 (d, *J* = 2.0 Hz), 132.2 (dd, *J* = 9.7, 4.5 Hz), 127.1, 124.0 (dd, *J* = 11.6, 3.9 Hz), 121.2 (d, *J* = 8.4 Hz), 119.6, 113.7, 111.8 (dd, *J* = 21.1, 3.7 Hz), 104.3 (dd, *J* = 26.6, 25.6 Hz), 75.2, 55.2, 30.3. 19F NMR (471 MHz, CDCl3) δ -109.35, -112.72. HRMS (ESI): Calcd. for C20H18F2NO2 [M+H]+: 342.1300; found: 342.1304.

1-(4-(tert-butyl)phenyl)-1-(2-(3,5-dimethylphenyl)pyridin-4-yl)ethan-1-ol (**C37**)

White solid; (32.3 mg, 45% yield, **C37/C37'** = 16:1); 1H NMR (500 MHz, CDCl3) δ 8.57 (d, *J* = 5.2 Hz, 1H), 7.82 (d, *J* = 1.9 Hz, 1H), 7.57 (s, 2H), 7.36 (s, 4H), 7.21 (dd, *J* = 5.2, 1.8 Hz, 1H), 7.05 (s, 1H), 2.47 (s, 1H), 2.39 (s, 6H), 1.98 (s, 3H), 1.31 (s, 9H). 13C NMR (126 MHz, CDCl3) δ 157.8, 157.6, 150.5, 149.3, 143.3, 139.5, 138.2, 130.5, 125.5, 125.4, 124.9, 119.2, 117.6, 75.5, 34.4, 31.2, 30.2, 21.3.HRMS (ESI): Calcd. for C25H30NO [M+H]+: 360.2322; found: 360.2323.

1-(2-(benzo[d][1,3]dioxol-5-yl)pyridin-4-yl)-1-(4-(tert-butyl)phenyl)ethan-1-ol (**C38**)

White solid; (28.0 mg, 37% yield, **C38/C38'** = 11:1); 1H NMR (500 MHz, CDCl3) δ 8.54 (d, *J* = 5.1 Hz, 1H), 7.75 (s, 1H), 7.51 – 7.45 (m, 2H), 7.36 (s, 4H), 7.19 (dd, *J* = 5.2, 1.5 Hz, 1H), 6.88 (d, *J* = 8.0 Hz, 1H), 6.00 (s, 2H), 2.35 (s, 1H), 1.96 (s, 3H), 1.30 (s, 9H). 13C NMR (126 MHz, CDCl3) δ 157.5, 156.9, 150.5, 149.3, 148.3, 148.1, 143.2, 134.0, 125.4, 125.3, 121.0, 118.9, 116.8, 108.3, 107.4, 101.2, 75.4, 34.4, 31.2, 30.2.HRMS (ESI): Calcd. for C24H26NO3 [M+H]+: 376.1907; found: 376.1907.

1-(4-(tert-butyl)phenyl)-1-(2-(thiophen-3-yl)pyridin-4-yl)ethan-1-ol (**C39**)

Yellow solid; (23.1 mg, 34% yield); 1H NMR (500 MHz, CDCl3) δ 8.50 (d, *J* = 5.2 Hz, 1H), 7.87 (dd, *J* = 3.0, 1.3 Hz, 1H), 7.72 (s, 1H), 7.64 (dd, *J* = 5.0, 1.3 Hz, 1H), 7.36 (dd, *J* = 5.1, 3.0 Hz, 1H), 7.32 (d, *J* = 8.3 Hz, 2H), 7.15 (d, *J* = 8.1 Hz, 3H), 2.59 (t, 2H), 2.42 (s, 1H), 1.95 (s, 3H), 1.61 – 1.55 (m, 2H), 1.37 – 1.32 (m, 2H), 0.92 (t, *J* = 7.3 Hz, 3H). 13C NMR (126 MHz, CDCl3) δ 157.7, 153.5, 149.4, 143.5, 142.4, 142.3, 128.5, 126.3, 126.1, 125.7, 123.6, 119.1, 117.2, 75.5, 35.2, 33.5, 30.2, 22.3, 13.9.HRMS (ESI): Calcd. for C21H24NOS [M+H]+: 338.1573; found: 338.1575.

1-(4-butylphenyl)-1-(2-(thiophen-2-yl)pyridin-4-yl)ethan-1-ol (**C40**)

White solid; (30.4 mg, 45% yield); 1H NMR (500 MHz, CDCl3) δ 8.46 (d, *J* = 5.2 Hz, 1H), 7.78 (s, 1H), 7.57 (dd, *J* = 3.6, 1.1 Hz, 1H), 7.37 (d, *J* = 5.0 Hz, 1H), 7.32 (d, *J* = 8.2 Hz, 2H), 7.15 (d, *J* = 8.2 Hz, 2H), 7.14 – 7.07 (m, 2H), 2.59 (t, 2H), 2.33 (s, 1H), 1.95 (s, 3H), 1.60 – 1.55 (m, 2H), 1.37 – 1.32 (m, 2H), 0.92 (t, *J* = 7.3 Hz, 3H). 13C NMR (126 MHz, CDCl3) δ 157.7, 152.6, 149.4, 145.0, 143.4, 142.5, 128.5, 127.9, 127.5, 125.7, 124.6, 119.3, 115.6, 75.5, 35.2, 33.5, 30.2, 22.3, 13.9. HRMS (ESI): Calcd. for C21H24NOS [M+H]+: 338.1573; found: 338.1575.

ethyl-4-(hydroxy(phenyl)methyl)picolinate (**C41**)

Colorless oil; (21.7 mg, 42% yield, **C44/C44'** = 13:1); 1H NMR (500 MHz, CDCl3) δ 8.65 (d, *J* = 5.0 Hz, 1H), 8.14 (s, 1H), 7.51 (d, *J* = 5.0 Hz, 1H), 7.36 – 7.30 (m, 5H), 5.86 (s, 1H), 4.45 (q, *J* = 7.2 Hz, 2H), 2.83 (s, 1H), 1.42 (t, *J* = 7.2 Hz, 3H). 13C NMR (126 MHz, CDCl3) δ 165.2, 153.9, 149.9, 148.3, 142.2, 129.0, 128.5, 126.8, 124.1, 122.6, 74.9, 62.0, 14.3.HRMS (ESI): Calcd. for C15H16NO3 [M+H]+: 258.1125; found: 258.1128.

1-(4-methoxyphenyl)-1-(2-(trifluoromethyl)pyridin-4-yl)ethan-1-ol (**C42**)

White solid; (32.7 mg, 55% yield); 1H NMR (500 MHz, CDCl3) δ 8.58 (d, *J* = 5.1 Hz, 1H), 7.77 (s, 1H), 7.47 (d, *J* = 5.1 Hz, 1H), 7.31 (d, *J* = 8.7 Hz, 2H), 6.87 (d, *J* = 8.7 Hz, 2H), 3.80 (s, 3H), 2.62 (s, 1H), 1.94 (s, 3H). 13C NMR (126 MHz, CDCl3) δ 159.4, 159.2, 149.8, 148.2 (q, *J* = 34.0 Hz), 137.7, 127.2, 123.4, 121.6 (q, *J* = 274.4 Hz), 117.4 (q, *J* = 2.6 Hz), 114.0, 75.1, 55.3, 30.2. 19F NMR (376 MHz, CDCl3) δ -67.81. HRMS (ESI): Calcd. for C15H15F3NO2 [M+H]+: 298.1049; found: 298.1051.

1-(4-(tert-butyl)phenyl)-1-(2-vinylpyridin-4-yl)ethan-1-ol (**C43**)

White solid; (19.0 mg, 34% yield); 1H NMR (500 MHz, CDCl3) δ 8.44 (d, *J* = 4.8 Hz, 1H), 7.44 (s, 1H), 7.38 – 7.29 (m, 4H), 7.16 (dd, *J* = 5.2, 1.8 Hz, 1H), 6.79 (dd, *J* = 17.5, 10.8 Hz, 1H), 6.19 (dd, *J* = 17.5, 1.3 Hz, 1H), 5.45 (dd, *J* = 10.8, 1.3 Hz, 1H), 2.58 (s, 1H), 1.93 (s, 3H), 1.30 (s, 9H). 13C NMR (126 MHz, CDCl3) δ 157.47, 157.46, 155.6, 150.6, 149.3, 143.3, 137.0, 125.5, 125.4, 119.7, 118.2, 75.3, 34.5, 31.3, 30.2.HRMS (ESI): Calcd. for C19H24NO [M+H]+: 282.1852; found: 282.1853.

1-(4-(tert-butyl)phenyl)-1-(2-(3,3-dimethylbut-1-yn-1-yl)pyridin-4-yl)ethan-1-ol(**C44**)

White solid; (30.8 mg, 46% yield); 1H NMR (500 MHz, CDCl3) δ 8.40 (d, *J* = 5.2 Hz, 1H), 7.49 (d, *J* = 1.8 Hz, 1H), 7.34 (d, *J* = 8.6 Hz, 2H), 7.30 (d, *J* = 8.7 Hz, 2H), 7.18 (dd, *J* = 5.3, 1.8 Hz, 1H), 2.56 (s, 1H), 1.91 (s, 3H), 1.33 (s, 9H), 1.30 (s, 9H). 13C NMR (126 MHz, CDCl3) δ 157.1, 150.6, 149.5, 143.7, 143.1, 125.5, 125.4, 123.7, 119.5, 98.5, 79.1, 75.1, 34.4, 31.2, 30.7, 30.0, 27.8. HRMS (ESI): Calcd. for C23H30NO [M+H]+: 336.2322; found: 336.2323.

1,1'-([2,2'-bipyridine]-4,4'-diyl)bis(1-(4-methoxyphenyl)ethan-1-ol) (**C45**)

White solid; (36.7 mg, 40% yield, mixture of isomer); 1H NMR (500 MHz, CDCl3) δ 8.68 – 8.56 (m, 1H), 8.56 – 8.47 (m, 1H), 8.46 – 8.43 (m, 1H), 8.31 – 8.20 (m, 1H), 7.81 (d, *J* = 8.1 Hz, 1H), 7.37 – 7.28 (m, 5H), 6.88 – 6.79 (m, 4H), 3.78 (s, 3H), 3.77 (s, 3H), 2.86 (s, 1H), 2.64 (d, *J* = 61.1 Hz, 1H), 1.98 – 1.91 (m, 6H). 13C NMR (126 MHz, CDCl3) δ 158.8, 158.2, 156.3, 155.91, 155.89, 154.55, 154.54, 149.14, 149.05, 147.1, 147.0, 139.2, 138.8, 134.5, 134.4, 127.2, 127.1, 120.9, 120.8, 120.7, 120.4, 118.3, 118.2, 118.00, 117.96, 113.7, 75.4, 74.73, 74.69, 55.3, 55.2, 30.8, 30.7, 30.21.HRMS (ESI): Calcd. for C28H29N2O4 [M+H]+: 457.2122; found: 457.2127.

1-(4-methoxyphenyl)-1-(pyridin-4-yl)ethan-1-ol (**C46**)

White solid; (18.2 mg, 40% yield), 1H NMR (400 MHz, CDCl3) δ 8.49 (d, *J* = 5.4 Hz, 2H), 7.38 – 7.28 (m, 4H), 6.89 – 6.82 (m, 2H), 3.79 (s, 3H), 1.91 (s, 3H). 13C NMR (101 MHz, CDCl3) δ 158.8, 157.6, 149.2, 138.7, 127.1, 120.8, 113.6, 74.9, 55.2, 30.2. HRMS (ESI): Calcd. for C14H16NO2 [M+H]+: 230.1176; found: 230.1177.

*N*-(phenyl(2-phenylpyridin-4-yl)methyl)cyclohexanamine (**C47**)

Yellow oil; (17.0 mg, 25% yield); 1H NMR (500 MHz, CDCl3) δ 8.59 (d, *J* = 5.0 Hz, 1H), 7.96 (d, *J* = 7.1 Hz, 2H), 7.80 (s, 1H), 7.46 (t, *J* = 7.4 Hz, 2H), 7.42 – 7.36 (m, 3H), 7.33 – 7.28 (m, 3H), 7.26 – 7.21 (m, 1H), 5.06 (s, 1H), 2.42 (s, 1H), 1.99 – 1.92 (m, 2H), 1.69 – 1.59 (m, 4H), 1.18 – 1.10 (m, 4H). 13C NMR (126 MHz, CDCl3) δ 157.6, 154.4, 149.7, 139.6, 128.8, 128.7, 128.7, 127.5, 127.4, 127.0, 121.1, 119.4, 63.3, 54.3, 34.0, 33.8, 26.1, 25.04, 25.02.HRMS (ESI): Calcd. for C24H27N2 [M+H]+: 343.2169; found: 343.2172.

*N*-(1-(2-phenylpyridin-4-yl)butyl)aniline (**C48**)

Brown oil; (19.5 mg, 32% yield); 1H NMR (500 MHz, CDCl3) δ 8.62 (d, *J* = 5.0 Hz, 1H), 7.98 (d, *J* = 7.1 Hz, 2H), 7.72 (s, 1H), 7.47 (t, *J* = 7.4 Hz, 2H), 7.41 (t, *J* = 7.3 Hz, 1H), 7.23 (d, *J* = 5.0 Hz, 1H), 7.10 (t, *J* = 7.9 Hz, 2H), 6.68 (t, *J* = 7.3 Hz, 1H), 6.51 (d, *J* = 8.5 Hz, 2H), 4.36 (t, *J* = 6.8 Hz, 1H), 4.13 (s, 1H), 1.84 – 1.77 (m, 2H), 1.52 – 1.40 (m, 2H), 0.97 (t, *J* = 7.3 Hz, 3H). 13C NMR (126 MHz, CDCl3) δ 157.8, 154.5, 149.9, 146.9, 139.4, 129.2, 128.9, 128.7, 127.0, 120.2, 118.5, 117.7, 113.2, 57.5, 40.6, 19.4, 13.9. HRMS (ESI): Calcd. for C21H23N2 [M+H]+: 303.1856; found: 303.1858.

1-(4-methoxyphenyl)-1-(4-phenylpyridin-2-yl)ethan-1-ol (**C49'**)

White solid; (25.0 mg, 41% yield); 1H NMR (500 MHz, CDCl3) δ 8.55 (d, *J* = 5.2 Hz, 1H), 7.56 (d, *J* = 7.5 Hz, 2H), 7.48 – 7.40 (m, 6H), 7.39 (d, *J* = 5.1 Hz, 1H), 6.85 (d, *J* = 8.6 Hz, 2H), 5.76 (s, 1H), 3.77 (s, 3H), 1.96 (s, 3H). 13C NMR (126 MHz, CDCl3) δ 165.7, 158.5, 149.5, 147.7, 139.3, 138.2, 129.1, 129.1, 127.1, 127.1, 120.2, 118.1, 113.5, 74.9, 55.2, 29.4. HRMS (ESI): Calcd. for C20H20NO2 [M+H]+: 306.1489; found: 306.1451.

1,1'-(4-phenylpyridine-2,6-diyl)bis(1-(4-methoxyphenyl)ethan-1-ol) (**C50'**)

White solid; (22.7 mg, 25% yield); 1H NMR (500 MHz, CDCl3) δ 7.50 (d, *J* = 7.2 Hz, 2H), 7.46 – 7.36 (m, 9H), 6.85 (dd, *J* = 8.7, 4.0 Hz, 4H), 4.75 (s, 2H), 3.79 (s, 6H), 1.99 (s, 6H). 13C NMR (126 MHz, CDCl3) δ 164.2, 158.5, 138.9, 138.3, 129.12, 129.11, 129.0, 127.2, 127.08, 127.05, 116.66, 116.65, 113.5, 75.5, 75.5, 55.2, 29.6, 29.5.HRMS (ESI): Calcd. for C29H30NO4 [M+H]+: 456.2169; found: 456.2172.

1-(4-methoxyphenyl)-1-(5-phenylpyridin-2-yl)ethan-1-ol (**C51'**)

White solid; (21.2 mg, 35% yield); 1H NMR (500 MHz, CDCl3) δ 8.73 (s, 1H), 7.83 (d, *J* = 8.2 Hz, 1H), 7.55 (d, *J* = 8.0 Hz, 2H), 7.47 (t, *J* = 7.5 Hz, 2H), 7.42 (t, *J* = 7.8 Hz, 3H), 7.33 (d, *J* = 8.2 Hz, 1H), 6.86 (d, *J* = 8.0 Hz, 2H), 5.70 (s, 1H), 3.79 (s, 3H), 1.95 (s, 3H). 13C NMR (126 MHz, CDCl3) δ 163.9, 158.6, 145.8, 139.3, 137.4, 135.5, 135.1, 129.1, 128.1, 127.13, 127.08, 120.1, 113.5, 74.8, 55.2, 29.4.HRMS (ESI): Calcd. for C20H20NO2 [M+H]+: 306.1489; found: 306.1451.

1-(4-methoxyphenyl)-1-(2-methyl-6-phenylpyridin-4-yl)ethan-1-ol (**C52**)

White solid; (53.0 mg, 83% yield); 1H NMR (500 MHz, CDCl3) δ 7.93 (d, *J* = 7.7 Hz, 2H), 7.55 (s, 1H), 7.43 (t, *J* = 7.5 Hz, 2H), 7.38 (d, *J* = 7.4 Hz, 1H), 7.34 (d, *J* = 8.8 Hz, 2H), 7.12 (s, 1H), 6.86 (d, *J* = 8.7 Hz, 2H), 3.79 (s, 3H), 2.59 (s, 3H), 2.43 (d, *J* = 31.6 Hz, 1H), 1.92 (s, 3H). 13C NMR (126 MHz, CDCl3) δ 158.8, 158.3, 158.0, 157.1, 139.9, 138.8, 128.6, 128.6, 127.1, 127.1, 118.7, 115.0, 113.7, 75.3, 55.2, 30.3, 24.8. HRMS (ESI): Calcd. for C21H22NO2 [M+H]+: 320.1645; found: 320.1649.

1-(4-methoxyphenyl)-1-(5-methyl-2-phenylpyridin-4-yl)ethan-1-ol (**C53**)

White solid; (34.8 mg, 54% yield); 1H NMR (500 MHz, CDCl3) δ 8.35 (s, 1H), 8.15 (s, 1H), 8.03 (d, *J* = 7.5 Hz, 2H), 7.48 (t, *J* = 7.5 Hz, 2H), 7.41 (t, *J* = 7.6 Hz, 1H), 7.25 (d, *J* = 8.7 Hz, 2H), 6.85 (d, *J* = 8.6 Hz, 2H), 3.80 (s, 3H), 2.27 (s, 1H), 1.96 (s, 3H), 1.94 (s, 3H). 13C NMR (126 MHz, CDCl3) δ 158.8, 155.5, 154.6, 152.5, 139.6, 138.0, 129.6, 128.7, 128.6, 126.9, 126.8, 117.1, 113.8, 75.6, 55.3, 29.2, 17.8.HRMS (ESI): Calcd. for C21H22NO2 [M+H]+: 320.1645; found: 320.1648.

1-(4-(tert-butyl)phenyl)-1-(thieno[3,2-b]pyridin-7-yl)ethan-1-ol (**C54**)

White solid; (23.7 mg, 38% yield); 1H NMR (500 MHz, CDCl3) δ 8.61 (d, *J* = 4.9 Hz, 1H), 7.68 (d, *J* = 5.7 Hz, 1H), 7.52 (d, *J* = 5.6 Hz, 1H), 7.42 – 7.38 (m, 2H), 7.37 – 7.33 (m, 2H), 7.19 (d, *J* = 5.0 Hz, 1H), 2.60 (s, 1H), 2.08 (s, 3H), 1.30 (s, 9H). 13C NMR (126 MHz, CDCl3) δ 157.5, 151.4, 151.0, 147.3, 142.1, 132.0, 129.7, 125.7, 125.4, 124.6, 115.8, 76.6, 34.5, 31.3, 29.1.HRMS (ESI): Calcd. for C19H22NOS [M+H]+: 312.1417; found: 312.1418.

1-(4-(tert-butyl)phenyl)-1-(thieno[3,2-b]pyridin-5-yl)ethan-1-ol (**C54'**)

White solid; (8.9 mg, 14% yield); 1H NMR (500 MHz, CDCl3) δ 8.11 (dd, *J* = 8.5, 0.8 Hz, 1H), 7.76 (d, *J* = 5.5 Hz, 1H), 7.55 (dd, *J* = 5.5, 0.8 Hz, 1H), 7.42 (d, *J* = 8.5 Hz, 2H), 7.32 (d, *J* = 8.5 Hz, 2H), 7.24 (d, *J* = 8.4 Hz, 1H), 6.08 (s, 1H), 1.98 (s, 3H), 1.28 (s, 9H). 13C NMR (126 MHz, CDCl3) δ 162.8, 153.6, 149.8, 144.1, 131.5, 131.2, 131.0, 125.7, 125.1, 124.7, 116.0, 74.9, 34.4, 31.3, 29.4.HRMS (ESI): Calcd. for C19H22NOS [M+H]+: 312.1417; found: 312.1418.

1-(4-(tert-butyl)phenyl)-1-(furo[3,2-b]pyridin-7-yl)ethan-1-ol (**C55**)

White solid; (23.0 mg, 39% yield); 1H NMR (500 MHz, CDCl3) δ 8.50 (d, *J* = 1.8 Hz, 1H), 7.74 (d, *J* = 2.2 Hz, 1H), 7.40 – 7.36 (m, 3H), 7.32 (d, *J* = 8.6 Hz, 2H), 6.92 (d, *J* = 2.4 Hz, 1H), 3.22 (s, 1H), 2.12 (s, 3H), 1.29 (s, 9H). 13C NMR (126 MHz, CDCl3) δ 150.5, 148.2, 147.8, 146.3, 144.7, 142.6, 139.8, 125.3, 125.2, 116.0, 108.0, 74.7, 34.4, 31.2, 28.9.HRMS (ESI): Calcd. for C19H22NO2 [M+H]+: 296.1645; found: 296.1647.

1-(4-(tert-butyl)phenyl)-1-(furo[3,2-b]pyridin-5-yl)ethan-1-ol (**C55'**)

White solid; (12.3 mg, 21% yield); 1H NMR (500 MHz, CDCl3) δ 7.86 (d, *J* = 2.3 Hz, 1H), 7.71 (d, *J* = 8.6 Hz, 1H), 7.40 (d, *J* = 8.4 Hz, 2H), 7.31 (d, *J* = 8.5 Hz, 2H), 7.22 (d, *J* = 8.7 Hz, 1H), 6.98 (dd, *J* = 2.5, 0.9 Hz, 1H), 5.82 (s, 1H), 1.97 (s, 3H), 1.32 (s, 3H), 1.28 (s, 9H). 13C NMR (126 MHz, CDCl3) δ 161.6, 149.7, 149.3, 146.9, 145.1, 144.4, 125.6, 125.1, 119.1, 116.1, 107.9, 75.2, 34.4, 31.3, 29.7.HRMS (ESI): Calcd. for C19H22NO2 [M+H]+: 296.1645; found: 296.1647.

1-(4-butylphenyl)-1-(4-methylquinolin-2-yl)ethan-1-ol (**C56'**)

Colorless oil; (32.4 mg, 51% yield); 1H NMR (500 MHz, CDCl3) δ 8.13 (d, *J* = 8.4 Hz, 1H), 7.95 (d, *J* = 8.3 Hz, 1H), 7.73 (t, *J* = 7.6 Hz, 1H), 7.56 (t, *J* = 7.6 Hz, 1H), 7.45 (d, *J* = 8.1 Hz, 2H), 7.17 – 7.12 (m, 3H), 6.80 (s, 1H), 2.64 (s, 3H), 2.58 (t, *J* = 7.8 Hz, 2H), 2.00 (s, 3H), 1.61 – 1.54 (m, 2H), 1.37 – 1.31 (m, 2H), 0.92 (t, *J* = 7.4 Hz, 3H). 13C NMR (126 MHz, Chloroform-*d*) δ 164.0, 145.4, 145.2, 143.7, 141.6, 129.4, 129.3, 128.2, 127.1, 126.2, 126.1, 123.5, 118.9, 74.5, 35.1, 33.4, 28.5, 22.3, 19.0, 13.8.HRMS (ESI): Calcd. for C22H26NO [M+H]+: 320.2009; found: 320.2010.

1-(4-(tert-butyl)phenyl)-1-(quinolin-2-yl)ethan-1-ol (**C57'**)

Yellow oil; (25.6 mg, 42% yield); 1H NMR (500 MHz, CDCl3) δ 8.11 (d, *J* = 8.5 Hz, 1H), 8.07 (d, *J* = 8.6 Hz, 1H), 7.79 (d, *J* = 8.1 Hz, 1H), 7.76 – 7.71 (m, 1H), 7.54 (t, *J* = 7.5 Hz, 1H), 7.41 (d, *J* = 8.3 Hz, 2H), 7.30 (d, *J* = 8.6 Hz, 1H), 7.12 (d, *J* = 8.2 Hz, 2H), 6.67 (s, 1H), 2.56 (t, *J* = 7.7 Hz, 2H), 1.99 (s, 3H), 1.57 – 1.52 (m, 2H), 1.35 – 1.30 (m, 2H), 0.89 (t, *J* = 7.4 Hz, 3H). 13C NMR (126 MHz, CDCl3) δ 164.5, 145.5, 143.7, 141.8, 137.2, 129.8, 128.8, 128.3, 127.4, 127.1, 126.5, 126.1, 118.5, 74.9, 35.2, 33.5, 28.6, 22.3, 13.9.HRMS (ESI): Calcd. for C21H24NO [M+H]+: 306.1852; found: 306.1856.

1-(4-(tert-butyl)phenyl)-1-(4,7-phenanthrolin-3-yl)ethan-1-ol (**C5****8'**)

Light yellow solid; (19.4 mg, 27% yield); 1H NMR (500 MHz, CDCl3) δ 9.03 (dd, *J* = 4.4, 1.6 Hz, 1H), 8.86 – 8.82 (m, 2H), 8.28 (s, 2H), 7.61 (dd, *J* = 8.4, 4.4 Hz, 1H), 7.58 (d, *J* = 8.7 Hz, 1H), 7.47 (d, *J* = 8.5 Hz, 2H), 7.34 (d, *J* = 8.5 Hz, 2H), 6.38 (s, 1H), 2.05 (s, 3H), 1.28 (s, 9H). 13C NMR (126 MHz, CDCl3) δ 165.2, 150.4, 150.1, 147.7, 145.2, 143.5, 132.5, 131.8, 131.6, 130.6, 125.8, 125.2, 124.5, 123.4, 121.8, 119.1, 75.0, 34.4, 31.3, 29.0.HRMS (ESI): Calcd. for C24H25N2O [M+H]+: 357.1961; found: 357.1964.

1,4-diphenyl-1-(2-phenylpyridin-4-yl)butan-1-ol (**C59**)

White solid; (16.3 mg, 21% yield); 1H NMR (500 MHz, CDCl3) δ 8.57 (d, *J* = 5.2 Hz, 1H), 7.92 (d, *J* = 7.2 Hz, 2H), 7.75 (s, 1H), 7.45 (t, *J* = 7.3 Hz, 2H), 7.40 (dd, *J* = 7.4, 1.8 Hz, 3H), 7.32 (t, *J* = 7.6 Hz, 2H), 7.25 (dd, *J* = 7.4, 5.4 Hz, 3H), 7.18 (dt, *J* = 5.6, 2.8 Hz, 2H), 7.12 (d, *J* = 6.8 Hz, 2H), 2.66 (h, *J* = 6.6 Hz, 2H), 2.33 (dd, *J* = 9.2, 7.2 Hz, 2H), 2.25 (s, 1H), 1.79 – 1.72 (m, 1H), 1.58 – 1.52 (m, 1H). 13C NMR (126 MHz, CDCl3) δ 157.5, 156.3, 149.6, 145.7, 141.7, 139.5, 128.9, 128.7, 128.5, 128.4, 128.4, 127.5, 127.0, 125.9, 125.9, 119.5, 117.8, 77.7, 40.6, 35.8, 25.2. HRMS (ESI): Calcd. for C27H26NO [M+H]+: 380.2009; found: 380.2010.

3,5,5-trimethyl-1-(2-phenylpyridin-4-yl)cyclohex-2-en-1-ol (**C60a**)

Yellow oil; (9.5 mg, 16% yield); 1H NMR (500 MHz, CDCl3) δ 8.60 (d, *J* = 4.9 Hz, 1H), 7.98 (d, *J* = 7.0 Hz, 2H), 7.80 (s, 1H), 7.47 (t, *J* = 7.5 Hz, 2H), 7.40 (t, *J* = 7.3 Hz, 1H), 7.25 (d, *J* = 1.6 Hz, 1H), 5.50 (s, 1H), 1.97 (s, 1H), 1.90 – 1.85 (m, 2H), 1.83 (s, 3H), 1.66 (s, 1H), 1.17 (s, 3H), 0.97 (s, 3H). 13C NMR (126 MHz, CDCl3) δ 159.1, 157.5, 149.4, 139.7, 138.4, 128.8, 128.6, 127.0, 124.0, 119.1, 117.4, 73.4, 51.2, 44.2, 31.7, 30.5, 27.2, 24.2. HRMS (ESI): Calcd. for C20H24NO [M+H]+: 294.1853; found: 294.1857.

3,3,5-trimethyl-5-(2-phenylpyridin-4-yl)cyclohexan-1-one (**C60b**)

Colorless oil; (33.0 mg, 56% yield); 1H NMR (500 MHz, CDCl3) δ 8.59 (d, *J* = 5.3 Hz, 1H), 7.97 (d, *J* = 7.1 Hz, 2H), 7.74 (s, 1H), 7.48 (t, *J* = 7.5 Hz, 2H), 7.41 (t, *J* = 7.3 Hz, 1H), 7.24 (dd, *J* = 5.3, 1.9 Hz, 1H), 3.08 (dt, *J* = 14.1, 2.1 Hz, 1H), 2.46 (d, *J* = 14.0 Hz, 1H), 2.29 (dd, *J* = 14.6, 11.5 Hz, 2H), 2.15 – 2.11 (m, 1H), 1.99 (d, *J* = 14.3 Hz, 1H), 1.40 (s, 3H), 1.07 (s, 3H), 0.44 (s, 3H). 13C NMR (126 MHz, CDCl3) δ 210.5, 157.8, 157.8, 157.7, 149.7, 139.4, 129.0, 128.7, 127.0, 119.8, 118.3, 54.3, 51.0, 50.6, 42.8, 36.3, 34.4, 32.9, 28.5. HRMS (ESI): Calcd. for C20H24NO [M+H]+: 294.1853; found: 294.1855.

1-(3,5,5,6,8,8-hexamethyl-5,6,7,8-tetrahydronaphthalen-2-yl)-1-(2-phenylpyridin-4-yl)ethan-1-ol (**C61**)

White solid, (43.2 mg, 52% yield); 1H NMR (500 MHz, CDCl3) δ 8.55 (dd, *J* = 5.2, 2.1 Hz, 1H), 7.97 (d, *J* = 7.8 Hz, 2H), 7.83 (dd, *J* = 6.7, 1.6 Hz, 1H), 7.53 (d, *J* = 6.1 Hz, 1H), 7.47 (t, *J* = 7.5 Hz, 2H), 7.41 (t, *J* = 7.3 Hz, 1H), 7.10 – 7.02 (m, 2H), 2.35 (s, 1H), 2.0 1(s, 3H), 1.94 (s, 3H), 1.92 – 1.83 (m, 1H), 1.72 – 1.63 (m, 1H), 1.46 – 1.38 (m, 1H), 1.36 (s, 3H), 1.31 (d, *J* = 10.7 Hz, 6H), 1.07 (d, *J* = 12.0 Hz, 3H), 1.01 (d, *J* = 6.8 Hz, 3H). 13C NMR (126 MHz, CDCl3) δ 158.0, 157.2, 149.3, 145.77, 145.75, 141.6, 141.5, 139.7, 139.5, 134.0, 131.1, 131.0, 128.8, 128.6, 126.9, 124.1, 124.0, 119.1, 117.1, 76.3, 43.6, 43.6, 37.28, 37.26, 34.5, 34.4, 34.11, 34.10, 32.8, 32.7, 32.5, 32.3, 32.2, 32.0, 28.5, 28.2, 24.9, 24.6, 21.03, 21.02, 16.73, 16.69.HRMS (ESI): Calcd. for C29H36NO [M+H]+: 414.2791; found: 414.2796.

1-((4R,6aR,6bS,8aS,8bS,9aR,10aS,10bR)-4-hydroxy-6a,8a-dimethyl-4-(2-phenylpyridin-4-yl)-1,2,4,5,6,6a,6b,7,8,8a,9a,10,10a,10b-tetradecahydro-8bH-naphtho[2',1':4,5]indeno[1,2-b]oxiren-8b-yl)ethan-1-one (**C62**)

Colorless oil; (58.3 mg, 60% yield); 1H NMR (500 MHz, CDCl3) δ 8.63 (d, *J* = 5.1 Hz, 1H), 7.97 (d, *J* = 7.3 Hz, 2H), 7.89 (s, 1H), 7.48 (t, *J* = 7.5 Hz, 2H), 7.41 (t, *J* = 7.4 Hz, 1H), 7.29 (dd, *J* = 5.1, 1.6 Hz, 1H), 5.33 (s, 1H), 3.69 (s, 1H), 2.36 – 2.31 (m, 1H), 2.23 – 2.14 (m, 2H), 2.02 (s, 3H), 1.96 – 1.90 (m, 2H), 1.82 – 1.79 (m, 1H), 1.66 – 1.52 (m, 4H), 1.39 – 1.32 (m, 3H), 1.22 – 1.16 (m, 2H), 1.12 (s, 3H), 1.09 – 1.03 (m, 5H), 0.93 (dd, *J* = 15.8, 4.8 Hz, 1H). 13C NMR (126 MHz, CDCl3) δ 204.8, 157.3, 156.5, 149.2, 149.0, 139.5, 128.9, 128.8, 127.0, 123.5, 120.1, 118.3, 73.5, 70.8, 60.4, 54.7, 45.1, 41.7, 37.6, 35.8, 33.7, 33.5, 33.2, 32.3, 31.2, 29.7, 27.4, 26.0, 20.5, 18.8, 15.3.HRMS (ESI): Calcd. for C32H38NO3 [M+H]+: 484.2846; found: 484.2850.

1-(4-(((1R,2R,4R)-2-isopropyl-4-methylcyclohexyl)oxy)phenyl)-1-(2-phenylpyridin-4-yl)ethan-1-ol (**C63**)

White solid; (48.8 mg, 57% yield); 1H NMR (500 MHz, CDCl3) δ 8.57 (d, *J* = 5.1 Hz, 1H), 7.95 (d, *J* = 7.5 Hz, 2H), 7.82 (s, 1H), 7.45 (t, *J* = 7.5 Hz, 2H), 7.41 – 7.37 (m, 1H), 7.31 (d, *J* = 8.3 Hz, 2H), 7.24 (d, *J* = 5.2 Hz, 1H), 6.84 (d, *J* = 8.3 Hz, 2H), 4.61 (s, 1H), 2.53 (s, 1H), 2.06 (d, *J* = 16.1 Hz, 1H), 1.94 (s, 3H), 1.81 – 1.51 (m, 6H), 1.06 – 0.96 (m, 2H), 0.91 (d, *J* = 6.6 Hz, 3H), 0.84 (d, *J* = 6.7 Hz, 3H), 0.80 (d, *J* = 6.6 Hz, 3H). 13C NMR (126 MHz, CDCl3) δ 158.0, 157.6, 157.4, 149.4, 139.5, 137.8, 128.8, 128.6, 127.2, 127.0, 119.4, 117.6, 115.3, 115.2, 75.3, 73.1, 47.7, 37.5, 34.9, 30.3, 29.2, 26.1, 24.7, 22.3, 21.0, 20.8.HRMS (ESI): Calcd. for C29H36NO2 [M+H]+: 430.2741; found: 430.2742.

1-(2-(4-(((1R,5S)-6,6-dimethylbicyclo[3.1.1]hept-2-en-2-yl)methoxy)phenyl)pyridin-4-yl)-1-(4-methoxyphenyl)ethan-1-ol (**C64**)

Colorless oil; (55.6 mg, 61% yield); 1H NMR (500 MHz, CDCl3) δ 8.51 (d, *J* = 5.0 Hz, 1H), 7.88 (d, *J* = 8.4 Hz, 2H), 7.74 (s, 1H), 7.34 (d, *J* = 8.7 Hz, 2H), 7.14 (d, *J* = 4.6 Hz, 1H), 6.96 (d, *J* = 8.7 Hz, 2H), 6.85 (d, *J* = 8.5 Hz, 2H), 5.63 – 5.59 (m, 1H), 4.46 – 4.40 (m, 2H), 3.79 (s, 3H), 2.44 – 2.40 (m, 1H), 2.36 – 2.23 (m, 3H), 2.13 – 2.10 (m, 1H), 1.93 (s, 3H), 1.30 (s, 3H), 1.21 (d, *J* = 8.7 Hz, 1H), 0.85 (s, 3H). 13C NMR (126 MHz, CDCl3) δ 159.8, 158.9, 157.8, 157.2, 149.2, 143.7, 138.7, 131.9, 128.1, 127.2, 120.4, 118.7, 116.8, 115.0, 113.7, 75.3, 70.6, 55.2, 43.2, 40.8, 38.1, 31.5, 31.2, 30.3, 26.1, 21.1.HRMS (ESI): Calcd. for C30H34NO3 [M+H]+: 456.2533; found: 456.2536.

1-(5,5'-dimethyl-[2,2'-bipyridin]-4-yl)-1-(4-methoxyphenyl)ethan-1-ol (**C65**)

Yellow solid; (13.4 mg, 20% yield); 1H NMR (600 MHz, Chloroform-*d*) δ 8.72 (s, 1H), 8.47 – 8.45 (m, 1H), 8.31 (s, 1H), 8.26 (d, *J* = 8.1 Hz, 1H), 7.61 (dd, *J* = 8.1, 2.3 Hz, 1H), 7.26 – 7.22 (m, 2H), 6.83 – 6.79 (m, 2H), 3.78 (s, 3H), 2.65 (s, 1H), 2.38 (s, 3H), 1.98 (s, 3H), 1.96 (s, 3H). 13C NMR (151 MHz, Chloroform-*d*) δ 158.6, 154.7, 154.3, 153.8, 152.1, 149.5, 138.3, 137.5, 133.1, 131.6, 126.8, 120.5, 117.3, 113.6, 75.8, 55.2, 30.1, 18.3, 18.0. HRMS (ESI): Calcd. for C21H23N2O2 [M+H]+: 335.1754; found: 335.1760.

4-(1-(4-methoxyphenyl)vinyl)-2-phenylpyridine (**D3**)

Yellow oil; (49.1 mg, 85% yield); 1H NMR (500 MHz, CDCl3) δ 8.66 (d, *J* = 5.0 Hz, 1H), 7.97 (d, *J* = 7.5 Hz, 2H), 7.68 (s, 1H), 7.47 (t, *J* = 7.5 Hz, 2H), 7.41 (t, *J* = 7.3 Hz, 1H), 7.29 (d, *J* = 8.3 Hz, 2H), 7.21 (d, *J* = 5.1 Hz, 1H), 6.90 (d, *J* = 8.4 Hz, 2H), 5.56 (d, *J* = 16.7 Hz, 2H), 3.84 (s, 3H). 13C NMR (126 MHz, CDCl3) δ 159.6, 157.6, 150.1, 149.6, 147.6, 139.3, 132.2, 129.3, 128.9, 128.7, 127.0, 121.5, 119.9, 115.3, 113.8, 55.3.HRMS (ESI): Calcd. for C20H18NO [M+H]+: 288.1383; found: 288.1387.

2-(4-methoxyphenyl)-2-(2-phenylpyridin-4-yl)ethan-1-ol (**D4**)

White solid; (53.7 mg, 88% yield); 1H NMR (500 MHz, CDCl3) δ 8.56 (d, *J* = 7.9 Hz, 1H), 7.92 (d, *J* = 7.5 Hz, 2H), 7.59 (d, *J* = 3.1 Hz, 1H), 7.46 (t, *J* = 7.5 Hz, 2H), 7.41 (t, *J* = 7.3 Hz, 1H), 7.20 – 7.14 (m, 2H), 7.11 (t, *J* = 5.2 Hz, 1H), 6.88 (d, *J* = 7.7 Hz, 2H), 4.20 – 4.13 (m, 3H), 3.79 (s, 3H). 13C NMR (126 MHz, CDCl3) δ 158.7, 157.6, 152.0, 149.7, 139.2, 131.7, 129.3, 129.0, 128.7, 127.0, 121.9, 120.7, 114.3, 65.5, 55.3, 52.3.HRMS (ESI): Calcd. for C20H20NO2 [M+H]+: 306.1489; found: 306.1491.

4-(1-((3-chlorobenzoyl)oxy)-2-hydroxy-1-(4-methoxyphenyl)ethyl)-2-phenylpyridine 1-oxide (**D5**)

Yellow solid; (47.3 mg, 50% yield); 1H NMR (500 MHz, CDCl3) δ 8.19 (d, *J* = 8.0 Hz, 1H), 7.90 (s, 1H), 7.79 (d, *J* = 7.8 Hz, 1H), 7.74 – 7.70 (m, 2H), 7.55 – 7.50 (m, 2H), 7.45 – 7.40 (m, 3H), 7.34 (tq, *J* = 8.8, 5.6, 4.6 Hz, 3H), 7.26 – 7.23 (m, 1H), 6.89 (d, *J* = 8.9 Hz, 2H), 4.86 (s, 2H), 3.80 (s, 3H). 13C NMR (126 MHz, CDCl3) δ 165.1, 159.4, 148.6, 143.9, 139.9, 134.7, 133.8, 133.5, 132.2, 130.9, 129.9, 129.8, 129.7, 129.3, 128.3, 127.8, 127.5, 125.5, 122.6, 114.1, 76.2, 69.9, 55.3.HRMS (ESI): Calcd. for C27H23ClNO5 [M+H]+: 476.1259; found: 476.1263.

(2-(4-(1-hydroxy-1-(4-methoxyphenyl)ethyl)pyridin-2-yl)phenyl)(phenyl)methanone (**D6**)

White solid; (31.7 mg, 39% yield) 1H NMR (500 MHz, CDCl3) δ 8.29 (d, *J* = 5.2 Hz, 1H), 7.75 (d, *J* = 7.7 Hz, 1H), 7.64 – 7.57 (m, 3H), 7.55 – 7.50 (m, 2H), 7.49 (s, 1H), 7.36 (t, *J* = 7.5 Hz, 1H), 7.22 (t, *J* = 7.6 Hz, 2H), 7.15 (d, *J* = 8.7 Hz, 2H), 7.01 (dd, *J* = 5.3, 1.8 Hz, 1H), 6.81 (d, *J* = 8.8 Hz, 2H), 3.80 (s, 3H), 2.15 (s, 1H), 1.79 (s, 3H). 13C NMR (126 MHz, CDCl3) δ 198.2, 158.9, 157.3, 156.8, 149.1, 139.8, 139.4, 138.4, 137.7, 132.2, 130.2, 129.5, 129.0, 128.9, 128.5, 127.9, 127.1, 120.1, 119.0, 113.7, 75.1, 55.3, 30.1.HRMS (ESI): Calcd. for C27H24NO3 [M+H]+: 410.1751; found: 410.1753.

1-((4-nitrophenyl)sulfonyl)-2-phenethyl-1,2,3,4-tetrahydroquinoline (**D7**)

White solid; (50.6 mg, 51% yield, dr = 1.8 : 1); 1H NMR (500 MHz, CDCl3) δ 8.55 (d, *J* = 5.2 Hz, 0.36H), 8.49 (d, *J* = 5.1 Hz, 0.64H), 7.88 (d, *J* = 7.2 Hz, 0.72H), 7.82 (d, *J* = 7.0 Hz, 1.28H), 7.56 (s, 0.36H), 7.47 – 7.39 (m, 3.64H), 7.23 (t, *J* = 8.4 Hz, 2H), 7.18 – 7.11 (m, 3.28H), 7.01 – 6.97 (m, 1H), 6.87 – 6.79 (m, 2H), 6.73 (d, *J* = 8.8 Hz, 0.72H), 3.77 (d, *J* = 8.1 Hz, 3H), 2.48 (d, *J* = 7.1 Hz, 2H), 2.15 (d, *J* = 10.2 Hz, 3H), 1.93 – 1.63 (m, 2H), 1.50 (dd, *J* = 7.2, 3.1 Hz, 3H), 0.90 (d, *J* = 6.7 Hz, 6H). 13C NMR (126 MHz, CDCl3) δ 172.4, 172.2, 158.81, 158.77, 157.6, 157.5, 155.7, 155.5, 149.6, 149.5, 140.7, 140.6, 139.4, 139.3, 137.6, 137.5, 136.0, 135.6, 129.43, 129.37, 128.91, 128.86, 128.62, 128.58, 127.4, 127.3, 127.1, 127.00, 126.98, 119.0, 118.9, 117.3, 117.2, 113.6, 113.5, 83.3, 55.2, 55.1, 46.12, 46.07, 45.04, 45.01, 30.20, 30.18, 26.11, 26.06, 22.33, 22.30, 17.9, 17.7. HRMS (ESI): Calcd. for C33H36NO3 [M+H]+: 494.2690; found: 494.2691.

2-(4-(((1R,5S)-6,6-dimethylbicyclo[3.1.1]hept-2-en-2-yl)methoxy)phenyl)pyridine (**A28**)

Light yellow oil; (254 mg, 83% yield); 1H NMR (500 MHz, CDCl3) δ 8.66 (d, *J* = 4.7 Hz, 1H), 7.90 (d, *J* = 8.9 Hz, 2H), 7.70 (t, *J* = 7.9 Hz, 1H), 7.65 (d, *J* = 7.9 Hz, 1H), 7.18 – 7.15 (m, 1H), 7.00 (d, *J* = 8.8 Hz, 2H), 5.64 – 5.60 (m, 1H), 4.47 – 4.41 (m, 2H), 2.42 (dt, *J* = 8.7, 5.6 Hz, 1H), 2.36 – 2.22 (m, 3H), 2.14 – 2.10 (m, 1H), 1.30 (s, 3H), 1.22 (d, *J* = 8.7 Hz, 1H), 0.85 (s, 3H). 13C NMR (126 MHz, CDCl3) δ 159.8, 157.1, 149.3, 143.7, 136.8, 131.6, 128.1, 121.4, 120.4, 120.0, 115.0, 70.6, 43.2, 40.8, 38.0, 31.5, 31.2, 26.1, 21.0. HRMS (ESI): Calcd. for C21H24NO [M+H]+: 306.1852; found: 306.1855.

**12. NMR Spectra of Products**

**1H NMR spectrum of C1** (400 MHz, CDCl3)

**13C NMR spectrum of C1** (126 MHz, CDCl3)

**1H NMR spectrum of C2** (400 MHz, CDCl3)

**13C NMR spectrum of C2** (126 MHz, CDCl3)

**1H NMR spectrum of C3** (400 MHz, CDCl3)

**13C NMR spectrum of C3** (126 MHz, CDCl3)

**1H NMR spectrum of C4** (500 MHz, CDCl3)

**13C NMR spectrum of C4** (126 MHz, CDCl3)

**1H NMR spectrum of C5** (400 MHz, CDCl3)

**13C NMR spectrum of C5** (126 MHz, CDCl3)

**19F NMR spectrum of C5** (376 MHz, CDCl3)

**1H NMR spectrum of C6** (500 MHz, CDCl3)

**13C NMR spectrum of C6** (126 MHz, CDCl3)

**1H NMR spectrum of C7** (400 MHz, CDCl3)

**13C NMR spectrum of C7** (126 MHz, CDCl3)

**1H NMR spectrum of C8** (400 MHz, CDCl3)

**13C NMR spectrum of C8** (126 MHz, CDCl3)

**1H NMR spectrum of C9** (400 MHz, CDCl3)

**13C NMR spectrum of C9** (126 MHz, CDCl3)

**1H NMR spectrum of C10** (500 MHz, CDCl3)

**13C NMR spectrum of C10** (126 MHz, CDCl3)

**1H NMR spectrum of C11** (400 MHz, CDCl3)

**13C NMR spectrum of C11** (126 MHz, CDCl3)

**19F NMR spectrum of C11** (376 MHz, CDCl3)

**1H NMR spectrum of C12** (500 MHz, CDCl3)

**13C NMR spectrum of C12** (126 MHz, CDCl3)

**1H NMR spectrum of C13** (500 MHz, CDCl3)

**13C NMR spectrum of C13** (126 MHz, CDCl3)

**1H NMR spectrum of C14** (500 MHz, CDCl3)

**13C NMR spectrum of C14** (126 MHz, CDCl3)

**1H NMR spectrum of C15** (500 MHz, CDCl3)

**13C NMR spectrum of C15** (126 MHz, CDCl3)

**1H NMR spectrum of C16** (500 MHz, CDCl3)

**13C NMR spectrum of C16** (126 MHz, CDCl3)

**1H NMR spectrum of C17** (500 MHz, CDCl3)

**13C NMR spectrum of C17** (126 MHz, CDCl3)

**1H NMR spectrum of C18** (500 MHz, CDCl3)

**13C NMR spectrum of C18** (126 MHz, CDCl3)

**19F NMR spectrum of C18** (376 MHz, CDCl3)

**1H NMR spectrum of C19** (500 MHz, CDCl3)

**13C NMR spectrum of C19** (126 MHz, CDCl3)

**1H NMR spectrum of C20** (500 MHz, CDCl3)

**13C NMR spectrum of C20** (126 MHz, CDCl3)

**19F NMR spectrum of C20** (376 MHz, CDCl3)

**1H NMR spectrum of C21** (500 MHz, CDCl3)

**13C NMR spectrum of C21** (126 MHz, CDCl3)

**19F NMR spectrum of C21** (376 MHz, CDCl3)

**1H NMR spectrum of C22** (500 MHz, CDCl3)

**13C NMR spectrum of C22** (126 MHz, CDCl3)

**19F NMR spectrum of C22** (376 MHz, CDCl3)

**1H NMR spectrum of C23a** (500 MHz, CDCl3)

**13C NMR spectrum of C23a** (126 MHz, CDCl3)

**1H NMR spectrum of C23b** (500 MHz, CDCl3)

**13C NMR spectrum of C23b** (126 MHz, CDCl3)

**1H NMR spectrum of C24** (400 MHz, CDCl3)

**13C NMR spectrum of C24** (126 MHz, CDCl3)

**1H NMR spectrum of C25** (400 MHz, CDCl3)

**13C NMR spectrum of C25** (126 MHz, CDCl3)

**1H NMR spectrum of C26** (500 MHz, CDCl3)

**13C NMR spectrum of C26** (126 MHz, CDCl3)

**1H NMR spectrum of C27** (500 MHz, CDCl3)

**13C NMR spectrum of C27** (126 MHz, CDCl3)

**1H NMR spectrum of C28** (500 MHz, CDCl3)

**13C NMR spectrum of C28** (126 MHz, CDCl3)

**1H NMR spectrum of C29** (500 MHz, CDCl3)

**13C NMR spectrum of C29** (126 MHz, CDCl3)

**1H NMR spectrum of C30** (400 MHz, CDCl3)

**13C NMR spectrum of C30** (126 MHz, CDCl3)

**1H NMR spectrum of C31** (400 MHz, CDCl3)

**13C NMR spectrum of C31** (126 MHz, CDCl3)

**1H NMR spectrum of C32** (500 MHz, CDCl3)

**13C NMR spectrum of C32** (126 MHz, CDCl3)

**1H NMR spectrum of C33** (500 MHz, CDCl3)

**13C NMR spectrum of C33** (126 MHz, CDCl3)

**1H NMR spectrum of C34** (500 MHz, CDCl3)

**13C NMR spectrum of C34** (126 MHz, CDCl3)

**1H NMR spectrum of C35** (500 MHz, CDCl3)

**13C NMR spectrum of C35** (126 MHz, CDCl3)

**1H NMR spectrum of C36** (500 MHz, CDCl3)

**13C NMR spectrum of C36** (126 MHz, CDCl3)

**19F NMR spectrum of C36** (471 MHz, CDCl3)

**1H NMR spectrum of C37** (500 MHz, CDCl3)

**13C NMR spectrum of C37** (126 MHz, CDCl3)

**1H NMR spectrum of C38** (500 MHz, CDCl3)

**13C NMR spectrum of C38** (126 MHz, CDCl3)

**1H NMR spectrum of C39** (500 MHz, CDCl3)

**13C NMR spectrum of C39** (126 MHz, CDCl3)

**1H NMR spectrum of C40** (500 MHz, CDCl3)

**13C NMR spectrum of C40** (126 MHz, CDCl3)

**1H NMR spectrum of C41** (500 MHz, CDCl3)

**13C NMR spectrum of C41** (126 MHz, CDCl3)

**1H NMR spectrum of C42** (500 MHz, CDCl3)

**13C NMR spectrum of C42** (126 MHz, CDCl3)

**19F NMR spectrum of C42** (376 MHz, CDCl3)

**1H NMR spectrum of C43** (500 MHz, CDCl3)

**13C NMR spectrum of C43** (126 MHz, CDCl3)

**1H NMR spectrum of C44** (500 MHz, CDCl3)

**13C NMR spectrum of C44** (126 MHz, CDCl3)

**1H NMR spectrum of C45** (mixture of diastereoisomers, 500 MHz, CDCl3)

**13C NMR spectrum of C45** (mixture of diastereoisomers, 126 MHz, CDCl3)

**1H NMR spectrum of C46** (400 MHz, CDCl3)

**13C NMR spectrum of C46** (101 MHz, CDCl3)

**1H NMR spectrum of C47** (500 MHz, CDCl3)

**13C NMR spectrum of C47** (126 MHz, CDCl3)

**1H NMR spectrum of C48** (500 MHz, CDCl3)

**13C NMR spectrum of C48** (126 MHz, CDCl3)

**1H NMR spectrum of C49'** (500 MHz, CDCl3)

**13C NMR spectrum of C49'** (126 MHz, CDCl3)

**1H NMR spectrum of C50'** (500 MHz, CDCl3)

**13C NMR spectrum of C50'** (126 MHz, CDCl3)

**1H NMR spectrum of C51'** (500 MHz, CDCl3)

**13C NMR spectrum of C51'** (126 MHz, CDCl3)

**1H NMR spectrum of C52** (500 MHz, CDCl3)

**13C NMR spectrum of C52** (126 MHz, CDCl3)

**1H NMR spectrum of C53** (500 MHz, CDCl3)

**13C NMR spectrum of C53** (126 MHz, CDCl3)

**1H NMR spectrum of C54** (500 MHz, CDCl3)

**13C NMR spectrum of C54** (126 MHz, CDCl3)

**1H NMR spectrum of C54'** (500 MHz, CDCl3)

**13C NMR spectrum of C54'** (126 MHz, CDCl3)

**1H NMR spectrum of C55** (500 MHz, CDCl3)

**13C NMR spectrum of C55** (126 MHz, CDCl3)

**1H NMR spectrum of C55'** (500 MHz, CDCl3)

**13C NMR spectrum of C55'** (126 MHz, CDCl3)

**1H NMR spectrum of C56'** (500 MHz, CDCl3)

**13C NMR spectrum of C56'** (126 MHz, CDCl3)

**1H NMR spectrum of C57'** (500 MHz, CDCl3)

**13C NMR spectrum of C57'** (126 MHz, CDCl3)

**1H NMR spectrum of C58'** (500 MHz, CDCl3)

**13C NMR spectrum of C58'** (126 MHz, CDCl3)

**1H NMR spectrum of C59** (500 MHz, CDCl3)

**13C NMR spectrum of C59** (126 MHz, CDCl3)

**1H NMR spectrum of C60a** (500 MHz, CDCl3)

**13C NMR spectrum of C60a** (126 MHz, CDCl3)

**1H NMR spectrum of C60b** (500 MHz, CDCl3)

**13C NMR spectrum of C60b** (126 MHz, CDCl3)

**1H NMR spectrum of C61** (500 MHz, CDCl3)

**13C NMR spectrum of C61** (126 MHz, CDCl3)

**1H NMR spectrum of C62** (500 MHz, CDCl3)

**13C NMR spectrum of C62** (126 MHz, CDCl3)

**1H NMR spectrum of C63** (500 MHz, CDCl3)

**13C NMR spectrum of C63** (126 MHz, CDCl3)

**1H NMR spectrum of C64** (500 MHz, CDCl3)

**13C NMR spectrum of C64** (126 MHz, CDCl3)

**1H NMR spectrum of C65** (600 MHz, CDCl3)

**13C NMR spectrum of C64** (151 MHz, CDCl3)

**1H NMR spectrum of D1** (400 MHz, CDCl3)

**13C NMR spectrum of D1** (126 MHz, CDCl3)

**1H NMR spectrum of D2** (500 MHz, CDCl3)

**13C NMR spectrum of D2** (126 MHz, CDCl3)

**1H NMR spectrum of D3** (500 MHz, CDCl3)

**13C NMR spectrum of D3** (126 MHz, CDCl3)

**1H NMR spectrum of D4** (500 MHz, CDCl3)

**13C NMR spectrum of D4** (126 MHz, CDCl3)

**1H NMR spectrum of D5** (500 MHz, CDCl3)

**13C NMR spectrum of D5** (126 MHz, CDCl3)

**1H NMR spectrum of D6** (500 MHz, CDCl3)

**13C NMR spectrum of D6** (126 MHz, CDCl3)

**1H NMR spectrum of D7** (500 MHz, CDCl3)

**13C NMR spectrum of D7** (126 MHz, CDCl3)

**1H NMR spectrum of A28** (500 MHz, CDCl3)

**13C NMR spectrum of A28** (126 MHz, CDCl3)
